# Supplementary material for: Cyclic changes in gene expression induced by Peg-interferon alfa-2b plus ribavirin in peripheral blood monocytes (PBMC) of hepatitis C patients during the first 10 weeks of treatment
Source: PubMed Central journal article supplement (PMC2613871; doi:10.1186/1479-5876-6-66), 2008-11-05
Supplement: 1479-5876-6-66-S2.pdf [file 1479-5876-6-66-S2.pdf]

**Supplementary Table 2: Comparison of fold-changes at day 3, Pegasys vs. Peg-intron**

| Gene Symbol                  | Probe Set ID | Gene Title                                                                                                     | Pegasys | Peg-intron |
|------------------------------|--------------|----------------------------------------------------------------------------------------------------------------|---------|------------|
| <i>ABCA1</i>                 | 203505_at    | ATP-binding cassette, sub-family A (ABC1), member 1<br>ATP-binding cassette, sub-family C (CFTR/MRP), member 3 | 1.43    | 1.75       |
| <i>ABCC3</i>                 | 208161_s_at  | 3                                                                                                              | -1.16   | 1.66       |
| <i>ADAR</i>                  | 201786_s_at  | adenosine deaminase, RNA-specific                                                                              | 1.58    | 1.68       |
| <i>ADK</i>                   | 204120_s_at  | adenosine kinase                                                                                               | -1.01   | -1.54      |
| <i>ADM</i>                   | 202912_at    | adrenomedullin                                                                                                 | 1.67    | 1.84       |
| <i>AGRN</i>                  | 212285_s_at  | agrin                                                                                                          | 1.82    | 2.11       |
| <i>AGRN</i>                  | 217419_x_at  | agrin                                                                                                          | 1.60    | 1.42       |
| <i>AIF1</i>                  | 213095_x_at  | allograft inflammatory factor 1                                                                                | 1.50    | 1.21       |
| <i>AIM2</i>                  | 206513_at    | absent in melanoma 2                                                                                           | 1.47    | 1.64       |
| <i>AKAP2 /// PALM2-AKAP2</i> | 202760_s_at  | A kinase (PRKA) anchor protein 2 /// PALM2-AKAP2 protein<br>apolipoprotein B mRNA editing enzyme, catalytic    | 1.42    | 1.53       |
| <i>APOBEC3A</i>              | 210873_x_at  | polypeptide-like 3A                                                                                            | 3.23    | 2.94       |
| <i>APOL1</i>                 | 209546_s_at  | apolipoprotein L, 1                                                                                            | 1.40    | 1.42       |
| <i>APOL6</i>                 | 219716_at    | apolipoprotein L, 6                                                                                            | 1.66    | 1.43       |
| <i>ARRB1</i>                 | 218832_x_at  | arrestin, beta 1                                                                                               | 2.04    | 1.68       |
| <i>ATG12</i>                 | 204833_at    | ATG12 autophagy related 12 homolog ( <i>S. cerevisiae</i> )                                                    | -1.00   | 1.93       |
| <i>ATOX1</i>                 | 203454_s_at  | ATX1 antioxidant protein 1 homolog (yeast)                                                                     | 1.42    | 1.58       |
| <i>ATXN1</i>                 | 203231_s_at  | ataxin 1                                                                                                       | -1.27   | -1.58      |
| <i>BCL11A</i>                | 219497_s_at  | B-cell CLL/lymphoma 11A (zinc finger protein)                                                                  | -1.51   | -1.09      |
| <i>BLVRA</i>                 | 203771_s_at  | biliverdin reductase A                                                                                         | 1.91    | 1.63       |
| <i>BLVRA</i>                 | 211729_x_at  | biliverdin reductase A                                                                                         | 1.72    | 1.61       |
| <i>BLVRA</i>                 | 203773_x_at  | biliverdin reductase A                                                                                         | 1.59    | 1.55       |
| <i>BST2</i>                  | 201641_at    | bone marrow stromal cell antigen 2                                                                             | 2.23    | 2.06       |
| <i>C11orf2</i>               | 217969_at    | chromosome 11 open reading frame 2                                                                             | -1.42   | -1.63      |
| <i>C13orf18</i>              | 44790_s_at   | chromosome 13 open reading frame 18                                                                            | -1.49   | -1.26      |
| <i>C1GALT1</i>               | 219439_at    | core 1 synthase, glycoprotein-N-acetylgalactosamine 3-beta-galactosyltransferase, 1                            | 1.53    | 1.55       |
| <i>C1GALT1C1</i>             | 219283_at    | C1GALT1-specific chaperone 1                                                                                   | 1.47    | 1.37       |
| <i>C1QA</i>                  | 218232_at    | complement component 1, q subcomponent, A chain                                                                | 1.88    | 1.63       |
| <i>C1QB</i>                  | 202953_at    | complement component 1, q subcomponent, B chain                                                                | 2.04    | 1.97       |
| <i>C2</i>                    | 203052_at    | complement component 2                                                                                         | 1.63    | 1.66       |
| <i>C2orf47</i>               | 219176_at    | chromosome 2 open reading frame 47                                                                             | 1.57    | 1.71       |
| <i>C3AR1</i>                 | 209906_at    | complement component 3a receptor 1                                                                             | 2.12    | 2.27       |
| <i>CALML4</i>                | 64408_s_at   | calmodulin-like 4                                                                                              | 1.91    | 1.83       |
| <i>CALML4</i>                | 221879_at    | calmodulin-like 4                                                                                              | 1.81    | 1.72       |
| <i>CASP1</i>                 | 211368_s_at  | caspace 1, apoptosis-related cysteine peptidase (interleukin 1, beta, convertase)                              | 1.47    | 1.36       |
| <i>CASP1</i>                 | 211367_s_at  | caspace 1, apoptosis-related cysteine peptidase (interleukin 1, beta, convertase)                              | 1.48    | 1.34       |
| <i>CASP5</i>                 | 207500_at    | caspace 5, apoptosis-related cysteine peptidase                                                                | 1.68    | 1.48       |
| <i>CBR1</i>                  | 209213_at    | carbonyl reductase 1                                                                                           | 1.86    | 1.73       |
| <i>CCL2</i>                  | 216598_s_at  | chemokine (C-C motif) ligand 2                                                                                 | 15.11   | 13.36      |
| <i>CCR1</i>                  | 205099_s_at  | chemokine (C-C motif) receptor 1                                                                               | 2.10    | 2.06       |
| <i>CCR1</i>                  | 205098_at    | chemokine (C-C motif) receptor 1                                                                               | 2.55    | 1.89       |
| <i>CCR5</i>                  | 206991_s_at  | chemokine (C-C motif) receptor 5                                                                               | 1.52    | 1.43       |
| <i>CD164</i>                 | 208653_s_at  | CD164 molecule, sialomucin                                                                                     | 1.59    | 1.36       |
| <i>CD1C</i>                  | 205987_at    | CD1c molecule                                                                                                  | -1.76   | -2.51      |
| <i>CD2AP</i>                 | 203593_at    | CD2-associated protein                                                                                         | 1.31    | 1.63       |
| <i>CD38</i>                  | 205692_s_at  | CD38 molecule                                                                                                  | 1.68    | 1.95       |
| <i>CD44</i>                  | 212014_x_at  | CD44 molecule (Indian blood group)                                                                             | -1.23   | -1.50      |
| <i>CD44</i>                  | 209835_x_at  | CD44 molecule (Indian blood group)                                                                             | -1.18   | -1.56      |
| <i>CD86</i>                  | 205685_at    | CD86 molecule                                                                                                  | 1.53    | 1.33       |
| <i>CDKN1A</i>                | 202284_s_at  | cyclin-dependent kinase inhibitor 1A (p21, Cip1)                                                               | 1.72    | 1.50       |
| <i>CDKN1C</i>                | 216894_x_at  | cyclin-dependent kinase inhibitor 1C (p57, Kip2)                                                               | 2.04    | 2.21       |
| <i>CDKN1C</i>                | 219534_x_at  | cyclin-dependent kinase inhibitor 1C (p57, Kip2)                                                               | 2.19    | 2.20       |

|                      |             |                                                                                                                                           |       |       |
|----------------------|-------------|-------------------------------------------------------------------------------------------------------------------------------------------|-------|-------|
| <i>CDKN1C</i>        | 213348_at   | cyclin-dependent kinase inhibitor 1C (p57, Kip2)                                                                                          | 2.41  | 1.88  |
| <i>CDKN1C</i>        | 213182_x_at | cyclin-dependent kinase inhibitor 1C (p57, Kip2)                                                                                          | 1.74  | 1.81  |
| <i>CDKN1C</i>        | 213183_s_at | Cyclin-dependent kinase inhibitor 1C (p57, Kip2)<br>carboxylesterase 1 (monocyte/macrophage serine esterase<br>1)                         | 1.50  | 1.17  |
| <i>CES1</i>          | 209616_s_at | complement factor D (adipsin)                                                                                                             | 1.83  | 2.06  |
| <i>CFD</i>           | 205382_s_at | chromatin modifying protein 5                                                                                                             | 1.43  | 1.44  |
| <i>CHMP5</i>         | 219356_s_at | chromatin modifying protein 5                                                                                                             | 2.32  | 2.78  |
| <i>CHMP5</i>         | 218085_at   | chromatin modifying protein 5                                                                                                             | 2.39  | 2.56  |
| <i>CHST12</i>        | 218927_s_at | carbohydrate (chondroitin 4) sulfotransferase 12                                                                                          | 1.42  | 1.58  |
| <i>CIITA</i>         | 205101_at   | class II, major histocompatibility complex, transactivator                                                                                | -1.45 | -1.74 |
| <i>CISH</i>          | 221223_x_at | cytokine inducible SH2-containing protein                                                                                                 | 1.36  | 1.24  |
| <i>CLIC5</i>         | 213317_at   | chloride intracellular channel 5                                                                                                          | -1.24 | -1.79 |
| <i>CLU</i>           | 208792_s_at | clusterin                                                                                                                                 | 1.10  | 1.62  |
| <i>CMKLR1</i>        | 207652_s_at | chemokine-like receptor 1                                                                                                                 | 1.37  | 2.03  |
| <i>CMKLR1</i>        | 210659_at   | chemokine-like receptor 1                                                                                                                 | 1.27  | 1.69  |
| <i>CRIM1</i>         | 202551_s_at | cysteine rich transmembrane BMP regulator 1 (chordin-like)                                                                                | -1.06 | -1.60 |
| <i>CRTAP</i>         | 201380_at   | cartilage associated protein                                                                                                              | -1.12 | -1.52 |
| <i>CST3</i>          | 201360_at   | cystatin C (amyloid angiopathy and cerebral hemorrhage)                                                                                   | 1.55  | 1.16  |
| <i>CTSL1</i>         | 202087_s_at | cathepsin L1                                                                                                                              | 2.45  | 2.40  |
| <i>CUTL1</i>         | 202367_at   | cut-like 1, CCAAT displacement protein (Drosophila)                                                                                       | 1.52  | 1.53  |
| <i>CX3CR1</i>        | 205898_at   | chemokine (C-X3-C motif) receptor 1                                                                                                       | 1.41  | 1.40  |
| <i>CXCL1</i>         | 204470_at   | chemokine (C-X-C motif) ligand 1 (melanoma growth<br>stimulating activity, alpha)                                                         | -1.71 | -1.26 |
| <i>CXCL10</i>        | 204533_at   | chemokine (C-X-C motif) ligand 10                                                                                                         | 5.79  | 3.95  |
| <i>CXCR4</i>         | 211919_s_at | chemokine (C-X-C motif) receptor 4                                                                                                        | -1.40 | -1.39 |
| <i>CXCR4</i>         | 209201_x_at | chemokine (C-X-C motif) receptor 4                                                                                                        | -1.39 | -1.43 |
| <i>DDB2</i>          | 203409_at   | damage-specific DNA binding protein 2, 48kDa                                                                                              | 1.23  | 1.82  |
| <i>DDIT4</i>         | 202887_s_at | DNA-damage-inducible transcript 4                                                                                                         | -1.46 | -1.19 |
| <i>DDX58</i>         | 218943_s_at | DEAD (Asp-Glu-Ala-Asp) box polypeptide 58                                                                                                 | 2.63  | 2.83  |
| <i>DHX58</i>         | 219364_at   | DEXH (Asp-Glu-X-His) box polypeptide 58                                                                                                   | 2.60  | 2.97  |
| <i>DRAP1</i>         | 203258_at   | DR1-associated protein 1 (negative cofactor 2 alpha)                                                                                      | 1.53  | 1.45  |
| <i>DUSP6</i>         | 208893_s_at | dual specificity phosphatase 6                                                                                                            | 1.89  | 1.53  |
| <i>DUSP6</i>         | 208892_s_at | dual specificity phosphatase 6                                                                                                            | 1.62  | 1.29  |
| <i>ECGF1</i>         | 217497_at   | endothelial cell growth factor 1 (platelet-derived)                                                                                       | 1.81  | 2.03  |
| <i>ECGF1</i>         | 204858_s_at | endothelial cell growth factor 1 (platelet-derived)                                                                                       | 1.66  | 1.71  |
| <i>EEF1B2 ///</i>    |             | eukaryotic translation elongation factor 1 beta 2 ///                                                                                     |       |       |
| <i>hCG_19809 ///</i> |             | hCG1983058 /// eukaryotic translation elongation factor 1<br>beta 2-like                                                                  |       |       |
| <i>hCG_1983058</i>   | 200705_s_at | eukaryotic translation elongation factor 1 delta (guanine<br>nucleotide exchange protein)                                                 | -1.53 | -1.67 |
| <i>EEF1D</i>         | 203113_s_at | eukaryotic translation elongation factor 1 delta (guanine<br>nucleotide exchange protein)                                                 | -1.35 | -1.50 |
| <i>EEF2</i>          | 204102_s_at | eukaryotic translation elongation factor 2                                                                                                | -1.33 | -1.58 |
| <i>EEF2</i>          | 200094_s_at | eukaryotic translation elongation factor 2                                                                                                | -1.41 | -1.88 |
| <i>EIF2AK2</i>       | 204211_x_at | eukaryotic translation initiation factor 2-alpha kinase 2<br>eukaryotic translation initiation factor 3, subunit E interacting<br>protein | 2.09  | 2.59  |
| <i>EIF3EIP</i>       | 217719_at   | eukaryotic translation initiation factor 3, subunit E interacting<br>protein                                                              | -1.70 | -2.02 |
| <i>EIF4B</i>         | 219599_at   | eukaryotic translation initiation factor 4B                                                                                               | -1.30 | -1.58 |
| <i>EIF4B</i>         | 211938_at   | eukaryotic translation initiation factor 4B                                                                                               | -1.64 | -1.88 |
| <i>EIF4B</i>         | 211937_at   | eukaryotic translation initiation factor 4B                                                                                               | -1.64 | -1.97 |
| <i>ENC1</i>          | 201341_at   | ectodermal-neural cortex (with BTB-like domain)                                                                                           | -1.43 | -1.10 |
| <i>EPB41L3</i>       | 206710_s_at | erythrocyte membrane protein band 4.1-like 3                                                                                              | 1.60  | 1.63  |
| <i>EPHB2</i>         | 209589_s_at | EPH receptor B2                                                                                                                           | 2.24  | 3.25  |
| <i>ETV7</i>          | 221680_s_at | ets variant gene 7 (TEL2 oncogene)                                                                                                        | 1.62  | 1.55  |
| <i>FAM46A</i>        | 221766_s_at | family with sequence similarity 46, member A                                                                                              | 1.52  | 1.60  |
| <i>FAM46C</i>        | 220306_at   | family with sequence similarity 46, member C                                                                                              | -1.43 | -1.32 |
| <i>FAM70A</i>        | 219895_at   | family with sequence similarity 70, member A                                                                                              | 3.29  | 3.57  |
| <i>FANCL</i>         | 218397_at   | Fanconi anemia, complementation group L                                                                                                   | 1.33  | 1.63  |
| <i>FBL</i>           | 211623_s_at | fibrillarin                                                                                                                               | -1.62 | -1.74 |
| <i>FCGR1A</i>        | 216950_s_at | Fc fragment of IgG, high affinity Ia, receptor (CD64)                                                                                     | 1.83  | 1.54  |

|                       |             |                                                                                                                                       |       |       |
|-----------------------|-------------|---------------------------------------------------------------------------------------------------------------------------------------|-------|-------|
| <i>FCGR1B</i>         | 214511_x_at | Fc fragment of IgG, high affinity lb, receptor (CD64)                                                                                 | 1.85  | 1.69  |
| <i>FCN1</i>           | 205237_at   | ficolin (collagen/fibrinogen domain containing) 1                                                                                     | 1.55  | 1.19  |
| <i>FER1L3</i>         | 201798_s_at | fer-1-like 3, myoferlin (C. elegans)                                                                                                  | 1.64  | 1.43  |
| <i>FER1L3</i>         | 211864_s_at | fer-1-like 3, myoferlin (C. elegans)                                                                                                  | 1.86  | 1.34  |
| <i>FFAR2</i>          | 221345_at   | free fatty acid receptor 2                                                                                                            | 1.94  | 2.68  |
| <i>FGL2</i>           | 204834_at   | fibrinogen-like 2                                                                                                                     | 1.57  | 1.36  |
| <i>FLJ11286</i>       | 218429_s_at | hypothetical protein FLJ11286                                                                                                         | 1.46  | 1.78  |
| <i>FLJ11286</i>       | 53720_at    | hypothetical protein FLJ11286                                                                                                         | 1.61  | 1.71  |
| <i>FLJ20035</i>       | 218986_s_at | hypothetical protein FLJ20035                                                                                                         | 3.34  | 3.75  |
| <i>FOXO1</i>          | 202723_s_at | forkhead box O1                                                                                                                       | -1.58 | -1.25 |
| <i>FPRL1</i>          | 210773_s_at | formyl peptide receptor-like 1                                                                                                        | 1.51  | 1.57  |
| <i>FXYD6</i>          | 217897_at   | FXYD domain containing ion transport regulator 6                                                                                      | 1.59  | 1.36  |
| <i>GAS7</i>           | 202192_s_at | growth arrest-specific 7                                                                                                              | -1.38 | -1.55 |
| <i>GATM</i>           | 203178_at   | glycine amidinotransferase (L-arginine:glycine amidinotransferase)                                                                    | -1.55 | -1.61 |
| <i>GBP1</i>           | 202270_at   | guanylate binding protein 1, interferon-inducible, 67kDa                                                                              | 2.30  | 2.32  |
| <i>GBP1</i>           | 202269_x_at | guanylate binding protein 1, interferon-inducible, 67kDa                                                                              | 1.81  | 1.80  |
| <i>GIMAP4</i>         | 219243_at   | GTPase, IMAP family member 4                                                                                                          | 1.51  | 1.53  |
| <i>GLS</i>            | 203159_at   | glutaminase                                                                                                                           | -1.56 | -1.51 |
| <i>GLUL</i>           | 200648_s_at | glutamate-ammonia ligase (glutamine synthetase)                                                                                       | 1.02  | 1.56  |
| <i>GMPR</i>           | 204187_at   | guanosine monophosphate reductase                                                                                                     | 1.38  | 1.86  |
| <i>GRN</i>            | 216041_x_at | granulin                                                                                                                              | 1.68  | 1.50  |
| <i>GRN</i>            | 200678_x_at | granulin                                                                                                                              | 1.61  | 1.44  |
| <i>GRN</i>            | 211284_s_at | granulin                                                                                                                              | 1.70  | 1.41  |
| <i>GZMB</i>           | 210164_at   | granzyme B (granzyme 2, cytotoxic T-lymphocyte-associated serine esterase 1)                                                          | 1.34  | 1.61  |
| <i>H1F0</i>           | 208886_at   | H1 histone family, member 0                                                                                                           | 2.08  | 3.13  |
| <i>H2BFS</i>          | 208579_x_at | H2B histone family, member S                                                                                                          | 1.05  | 1.94  |
| <i>HADHA</i>          | 208631_s_at | hydroxyacyl-Coenzyme A dehydrogenase/3-ketoacyl-Coenzyme A thiolase/enoyl-Coenzyme A hydratase (trifunctional protein), alpha subunit | -1.15 | -1.51 |
| <i>hCG_1776259</i>    | 206548_at   | hypothetical protein FLJ23556                                                                                                         | 1.54  | 1.91  |
| <i>HERC5</i>          | 219863_at   | hect domain and RLD 5                                                                                                                 | 4.42  | 4.54  |
| <i>HERC6</i>          | 219352_at   | hect domain and RLD 6                                                                                                                 | 4.24  | 5.88  |
| <i>HESX1</i>          | 211267_at   | HESX homeobox 1                                                                                                                       | 14.74 | 11.52 |
| <i>HIST1H1C</i>       | 209398_at   | histone cluster 1, H1c                                                                                                                | 1.26  | 2.56  |
| <i>HIST1H2AE</i>      | 214469_at   | histone cluster 1, H2ae                                                                                                               | 1.13  | 2.40  |
| <i>HIST1H2AJ</i>      | 208583_x_at | histone cluster 1, H2aj                                                                                                               | 1.10  | 1.77  |
| <i>HIST1H2BC ///</i>  |             |                                                                                                                                       |       |       |
| <i>HIST1H2BG</i>      | 214455_at   | histone cluster 1, H2bg /// histone cluster 1, H2bc                                                                                   | 1.17  | 2.52  |
| <i>HIST1H2BD</i>      | 222067_x_at | histone cluster 1, H2bd                                                                                                               | 1.27  | 3.37  |
| <i>HIST1H2BD</i>      | 209911_x_at | histone cluster 1, H2bd                                                                                                               | 1.39  | 2.14  |
| <i>HIST1H2BE</i>      | 208527_x_at | histone cluster 1, H2be                                                                                                               | 1.11  | 1.90  |
| <i>HIST1H2BF</i>      | 208490_x_at | histone cluster 1, H2bf                                                                                                               | 1.14  | 2.40  |
| <i>HIST1H2BG</i>      | 210387_at   | histone cluster 1, H2bg                                                                                                               | -1.00 | 4.25  |
| <i>HIST1H2BG</i>      | 215779_s_at | histone cluster 1, H2bg                                                                                                               | 1.24  | 3.13  |
| <i>HIST1H2BH</i>      | 208546_x_at | histone cluster 1, H2bh                                                                                                               | 1.10  | 2.10  |
| <i>HIST1H2BI</i>      | 208523_x_at | histone cluster 1, H2bi                                                                                                               | 1.29  | 2.35  |
| <i>HIST1H3D</i>       | 214472_at   | histone cluster 1, H3d                                                                                                                | 1.26  | 3.11  |
| <i>HIST2H2AA3 ///</i> |             |                                                                                                                                       |       |       |
| <i>HIST2H2AA4</i>     | 214290_s_at | histone cluster 2, H2aa3 /// histone cluster 2, H2aa4                                                                                 | 1.52  | 3.14  |
| <i>HIST2H2AA3 ///</i> |             |                                                                                                                                       |       |       |
| <i>HIST2H2AA4</i>     | 218280_x_at | histone cluster 2, H2aa3 /// histone cluster 2, H2aa4                                                                                 | 1.33  | 2.89  |
| <i>HIST2H2BE</i>      | 202708_s_at | histone cluster 2, H2be                                                                                                               | -1.02 | 2.62  |
| <i>HNRNPA1 ///</i>    |             |                                                                                                                                       |       |       |
| <i>LOC728844</i>      | 222040_at   | heterogeneous nuclear ribonucleoprotein A1 /// hypothetical protein LOC728844                                                         | -1.60 | -1.07 |
| <i>HPSE</i>           | 219403_s_at | heparanase                                                                                                                            | 1.70  | 1.70  |
| <i>HSPA1A ///</i>     |             |                                                                                                                                       |       |       |
| <i>HSPA1B</i>         | 200800_s_at | heat shock 70kDa protein 1A /// heat shock 70kDa protein 1B                                                                           | 1.55  | 3.00  |

|                            |             |                                                             |       |       |
|----------------------------|-------------|-------------------------------------------------------------|-------|-------|
| <i>IFI16</i>               | 206332_s_at | interferon, gamma-inducible protein 16                      | 1.65  | 1.78  |
| <i>IFI16</i>               | 208966_x_at | interferon, gamma-inducible protein 16                      | 1.78  | 1.76  |
| <i>IFI16</i>               | 208965_s_at | interferon, gamma-inducible protein 16                      | 1.92  | 1.74  |
| <i>IFI27</i>               | 202411_at   | interferon, alpha-inducible protein 27                      | 46.60 | 73.30 |
| <i>IFI30</i>               | 201422_at   | interferon, gamma-inducible protein 30                      | 1.51  | 1.21  |
| <i>IFI35</i>               | 209417_s_at | interferon-induced protein 35                               | 2.91  | 3.19  |
| <i>IFI44</i>               | 214059_at   | Interferon-induced protein 44                               | 4.82  | 7.09  |
| <i>IFI44</i>               | 214453_s_at | interferon-induced protein 44                               | 4.50  | 5.97  |
| <i>IFI44L</i>              | 204439_at   | interferon-induced protein 44-like                          | 6.47  | 10.07 |
| <i>IFI6</i>                | 204415_at   | interferon, alpha-inducible protein 6                       | 2.80  | 3.00  |
| <i>IFIH1</i>               | 219209_at   | interferon induced with helicase C domain 1                 | 3.08  | 3.31  |
| <i>IFIH1</i>               | 216020_at   | Interferon induced with helicase C domain 1                 | 3.20  | 2.11  |
| <i>IFIT1</i>               | 203153_at   | interferon-induced protein with tetratricopeptide repeats 1 | 11.25 | 12.23 |
| <i>IFIT2</i>               | 217502_at   | interferon-induced protein with tetratricopeptide repeats 2 | 4.67  | 4.16  |
| <i>IFIT3</i>               | 204747_at   | interferon-induced protein with tetratricopeptide repeats 3 | 7.59  | 7.11  |
| <i>IFIT5</i>               | 203596_s_at | interferon-induced protein with tetratricopeptide repeats 5 | 2.69  | 2.74  |
| <i>IFIT5</i>               | 203595_s_at | interferon-induced protein with tetratricopeptide repeats 5 | 2.44  | 2.25  |
| <i>IFITM1</i>              | 201601_x_at | interferon induced transmembrane protein 1 (9-27)           | 1.83  | 2.01  |
| <i>IFITM1</i>              | 214022_s_at | interferon induced transmembrane protein 1 (9-27)           | 1.62  | 1.71  |
| <i>IFITM2</i>              | 201315_x_at | interferon induced transmembrane protein 2 (1-8D)           | 1.52  | 1.70  |
| <i>IFITM3</i>              | 212203_x_at | interferon induced transmembrane protein 3 (1-8U)           | 2.11  | 2.15  |
| <i>IFT81</i>               | 219372_at   | intraflagellar transport 81 homolog (Chlamydomonas)         | -1.13 | -1.51 |
| <i>IGF2BP3</i>             | 203820_s_at | insulin-like growth factor 2 mRNA binding protein 3         | 1.23  | 1.67  |
| <i>IGFBP7</i>              | 201162_at   | insulin-like growth factor binding protein 7                | 1.71  | 1.40  |
| <i>IGHA1</i>               | 215118_s_at | Immunoglobulin heavy constant alpha 1                       | -2.13 | -1.84 |
| <i>IGHD</i>                | 213674_x_at | immunoglobulin heavy constant delta                         | -1.66 | -1.44 |
| <i>IGHG1 /// IGHG2 ///</i> |             | immunoglobulin heavy constant gamma 1 (G1m marker) ///      |       |       |
| <i>IGHG3 /// IGHM ///</i>  |             | gamma 2 (G2m marker) /// gamma 3 (G3m marker) /// mu ///    |       |       |
| <i>IGHV4-31</i>            | 211430_s_at | immunoglobulin heavy variable 4-31                          | -1.77 | -1.39 |
| <i>IGSF6</i>               | 206420_at   | immunoglobulin superfamily, member 6                        | 1.54  | 1.38  |
| <i>IL13RA1</i>             | 201887_at   | interleukin 13 receptor, alpha 1                            | -1.25 | -1.53 |
| <i>IL1R2</i>               | 205403_at   | interleukin 1 receptor, type II                             | -2.05 | -1.36 |
| <i>IL1RN</i>               | 212657_s_at | interleukin 1 receptor antagonist                           | 2.20  | 2.12  |
| <i>IL1RN</i>               | 216243_s_at | interleukin 1 receptor antagonist                           | 1.63  | 1.56  |
| <i>IL1RN</i>               | 212659_s_at | interleukin 1 receptor antagonist                           | 1.48  | 1.51  |
| <i>IRF2</i>                | 203275_at   | interferon regulatory factor 2                              | 1.49  | 1.24  |
| <i>IRF7</i>                | 208436_s_at | interferon regulatory factor 7                              | 3.24  | 3.65  |
| <i>IRS2</i>                | 209184_s_at | insulin receptor substrate 2                                | -1.45 | -1.54 |
| <i>IRS2</i>                | 209185_s_at | insulin receptor substrate 2                                | -1.67 | -1.69 |
| <i>ISG15</i>               | 205483_s_at | ISG15 ubiquitin-like modifier                               | 6.16  | 6.76  |
| <i>ISG20</i>               | 204698_at   | interferon stimulated exonuclease gene 20kDa                | 1.92  | 2.54  |
| <i>ISG20</i>               | 33304_at    | interferon stimulated exonuclease gene 20kDa                | 1.65  | 1.79  |
|                            |             | integrin, alpha E (antigen CD103, human mucosal             |       |       |
| <i>ITGAE</i>               | 205055_at   | lymphocyte antigen 1; alpha polypeptide)                    | -1.42 | -1.57 |
| <i>ITM2C</i>               | 221004_s_at | integral membrane protein 2C                                | -1.51 | -1.34 |
| <i>JAK2</i>                | 205841_at   | Janus kinase 2 (a protein tyrosine kinase)                  | 1.55  | 1.65  |
| <i>JAK2</i>                | 205842_s_at | Janus kinase 2 (a protein tyrosine kinase)                  | 1.68  | 1.64  |
| <i>JUP</i>                 | 201015_s_at | junction plakoglobin                                        | 2.04  | 3.39  |
| <i>KCTD14</i>              | 58916_at    | potassium channel tetramerisation domain containing 14      | 1.49  | 1.82  |
| <i>KIAA0082</i>            | 212380_at   | KIAA0082                                                    | 1.48  | 1.35  |
| <i>KIAA0125</i>            | 206478_at   | KIAA0125                                                    | -1.64 | -1.57 |
| <i>KIAA1466</i>            | 222139_at   | KIAA1466 gene                                               | 1.06  | 1.64  |
| <i>KLRD1</i>               | 207795_s_at | killer cell lectin-like receptor subfamily D, member 1      | 1.27  | 1.51  |
| <i>KMO</i>                 | 211138_s_at | kynurenine 3-monooxygenase (kynurenine 3-hydroxylase)       | 1.66  | 1.77  |

|                          |             |                                                                                          |       |       |
|--------------------------|-------------|------------------------------------------------------------------------------------------|-------|-------|
| <i>KMO</i>               | 205306_x_at | kynurenine 3-monooxygenase (kynurenine 3-hydroxylase)                                    | 1.57  | 1.73  |
| <i>KRT10</i>             | 207023_x_at | keratin 10 (epidermolytic hyperkeratosis; keratosis palmaris et plantaris)               | -1.34 | -1.54 |
| <i>KRT10</i>             | 210633_x_at | keratin 10 (epidermolytic hyperkeratosis; keratosis palmaris et plantaris)               | -1.46 | -1.63 |
| <i>LAG3</i>              | 206486_at   | lymphocyte-activation gene 3                                                             | 1.33  | 1.75  |
| <i>LAMP3</i>             | 205569_at   | lysosomal-associated membrane protein 3                                                  | 4.10  | 6.02  |
| <i>LAP3</i>              | 217933_s_at | leucine aminopeptidase 3                                                                 | 2.16  | 2.04  |
| <i>LBA1</i>              | 213261_at   | lupus brain antigen 1                                                                    | 1.45  | 1.52  |
| <i>LDLR</i>              | 202068_s_at | low density lipoprotein receptor (familial hypercholesterolemia)                         | 1.48  | 1.70  |
| <i>LGALS3BP</i>          | 200923_at   | lectin, galactoside-binding, soluble, 3 binding protein                                  | 2.78  | 3.99  |
| <i>LGALS9</i>            | 203236_s_at | lectin, galactoside-binding, soluble, 9 (galectin 9)                                     | 1.99  | 1.88  |
| <i>LILRA3</i>            | 206881_s_at | leukocyte immunoglobulin-like receptor, subfamily A (without TM domain), member 3        | 1.96  | 1.57  |
| <i>LILRB1</i>            | 207104_x_at | leukocyte immunoglobulin-like receptor, subfamily B (with TM and ITIM domains), member 1 | 1.69  | 1.36  |
| <i>LILRB1</i>            | 211336_x_at | leukocyte immunoglobulin-like receptor, subfamily B (with TM and ITIM domains), member 1 | 1.52  | 1.29  |
| <i>LILRB2</i>            | 210146_x_at | leukocyte immunoglobulin-like receptor, subfamily B (with TM and ITIM domains), member 2 | 1.75  | 1.54  |
| <i>LILRB2</i>            | 207697_x_at | leukocyte immunoglobulin-like receptor, subfamily B (with TM and ITIM domains), member 2 | 1.49  | 1.49  |
| <i>LILRB3</i>            | 210225_x_at | leukocyte immunoglobulin-like receptor, subfamily B (with TM and ITIM domains), member 3 | 1.48  | 1.28  |
| <i>LILRB3</i>            | 211135_x_at | leukocyte immunoglobulin-like receptor, subfamily B (with TM and ITIM domains), member 3 | 1.61  | 1.22  |
| <i>LILRB3</i>            | 211133_x_at | leukocyte immunoglobulin-like receptor, subfamily B (with TM and ITIM domains), member 3 | 1.48  | 1.16  |
| <i>LMO2</i>              | 204249_s_at | LIM domain only 2 (rhombotin-like 1)                                                     | 1.56  | 1.36  |
| <i>LOC161527 /// PML</i> | 211012_s_at | promyelocytic leukemia /// hypothetical protein LOC161527                                | 1.91  | 2.34  |
| <i>LOC26010</i>          | 222154_s_at | viral DNA polymerase-transactivated protein 6                                            | 3.96  | 4.32  |
| <i>LOC391020</i>         | 216565_x_at | interferon induced transmembrane protein pseudogene                                      | 2.17  | 2.68  |
| <i>LOC442171</i>         | 217379_at   | similar to ribosomal protein L10                                                         | -1.50 | -1.65 |
| <i>LOC442215</i>         | 217142_at   | similar to Elongation Factor family member (eft-4)                                       | -1.49 | -1.63 |
| <i>LOC642741</i>         | 215963_x_at | similar to ribosomal protein L3 isoform a                                                | -1.50 | -1.36 |
| <i>LTA4H</i>             | 208771_s_at | leukotriene A4 hydrolase                                                                 | -1.36 | -1.73 |
| <i>LY6E</i>              | 202145_at   | lymphocyte antigen 6 complex, locus E                                                    | 3.40  | 4.11  |
| <i>LY96</i>              | 206584_at   | lymphocyte antigen 96                                                                    | 1.71  | 1.49  |
| <i>MAFB</i>              | 218559_s_at | v-maf musculoaponeurotic fibrosarcoma oncogene homolog B (avian)                         | 1.98  | 1.65  |
| <i>MARCH1</i>            | 219574_at   | membrane-associated ring finger (C3HC4) 1                                                | 1.58  | 1.55  |
| <i>MARCKS</i>            | 201670_s_at | myristoylated alanine-rich protein kinase C substrate                                    | 2.57  | 2.43  |
| <i>MARCKS</i>            | 201669_s_at | myristoylated alanine-rich protein kinase C substrate                                    | 2.29  | 2.07  |
| <i>MARCKS</i>            | 201668_x_at | myristoylated alanine-rich protein kinase C substrate                                    | -1.04 | 1.93  |
| <i>MARCKS</i>            | 213002_at   | myristoylated alanine-rich protein kinase C substrate                                    | 1.48  | 1.74  |
| <i>MARCO</i>             | 205819_at   | macrophage receptor with collagenous structure                                           | 3.20  | 2.58  |
| <i>MICAL2</i>            | 212473_s_at | microtubule associated monooxygenase, calponin and LIM domain containing 2               | -1.25 | -1.63 |
| <i>MICAL2</i>            | 212472_at   | microtubule associated monooxygenase, calponin and LIM domain containing 2               | -1.21 | -1.68 |
| <i>MRPL42</i>            | 217919_s_at | mitochondrial ribosomal protein L42                                                      | 1.54  | 1.53  |
| <i>MS4A4A</i>            | 219607_s_at | membrane-spanning 4-domains, subfamily A, member 4                                       | 4.27  | 3.86  |
| <i>MT1A /// MT1M ///</i> |             | metallothionein 1A /// metallothionein 1M /// metallothionein                            |       |       |
| <i>MT1P2</i>             | 216336_x_at | 1 pseudogene 2                                                                           | 1.58  | 1.72  |
| <i>MT1E</i>              | 212859_x_at | metallothionein 1E                                                                       | 1.51  | 1.74  |
| <i>MT1F</i>              | 217165_x_at | metallothionein 1F                                                                       | 1.44  | 1.80  |
| <i>MT1G</i>              | 204745_x_at | metallothionein 1G                                                                       | 1.42  | 1.63  |

|                       |             |                                                                                      |       |       |
|-----------------------|-------------|--------------------------------------------------------------------------------------|-------|-------|
| <i>MT1H /// MT1P2</i> | 206461_x_at | metallothionein 1H /// metallothionein 1 pseudogene 2                                | 2.27  | 2.28  |
| <i>MT1P2</i>          | 211456_x_at | metallothionein 1 pseudogene 2                                                       | 2.42  | 2.38  |
| <i>MT1X</i>           | 208581_x_at | metallothionein 1X                                                                   | 2.36  | 2.49  |
| <i>MT1X</i>           | 204326_x_at | metallothionein 1X                                                                   | 1.43  | 1.56  |
| <i>MT2A</i>           | 212185_x_at | metallothionein 2A                                                                   | 2.05  | 2.03  |
|                       |             | myxovirus (influenza virus) resistance 1, interferon-inducible                       |       |       |
| <i>MX1</i>            | 202086_at   | protein p78 (mouse)                                                                  | 4.33  | 5.02  |
| <i>MX2</i>            | 204994_at   | myxovirus (influenza virus) resistance 2 (mouse)                                     | 3.02  | 3.13  |
| <i>N4BP1</i>          | 204601_at   | Nedd4 binding protein 1                                                              | 1.69  | 1.92  |
| <i>N4BP1</i>          | 32069_at    | Nedd4 binding protein 1                                                              | 1.58  | 1.83  |
| <i>N4BP1</i>          | 221867_at   | Nedd4 binding protein 1                                                              | 1.53  | 1.54  |
| <i>NAGK</i>           | 218231_at   | N-acetylglucosamine kinase                                                           | 1.74  | 1.46  |
|                       |             | NDC80 homolog, kinetochore complex component (S. cerevisiae)                         | -1.01 | 1.51  |
| <i>NDC80</i>          | 204162_at   |                                                                                      |       |       |
| <i>NELL2</i>          | 203413_at   | NEL-like 2 (chicken)                                                                 | -1.52 | -1.51 |
|                       |             | nerve growth factor receptor (TNFRSF16) associated protein 1                         | -1.07 | 1.67  |
| <i>NGFRAP1</i>        | 217963_s_at |                                                                                      |       |       |
| <i>NMI</i>            | 203964_at   | N-myc (and STAT) interactor                                                          | 1.77  | 1.86  |
| <i>NR4A2</i>          | 204621_s_at | nuclear receptor subfamily 4, group A, member 2                                      | -2.04 | -1.61 |
| <i>NRG1</i>           | 206343_s_at | neuregulin 1                                                                         | -1.37 | -2.73 |
| <i>OAS1</i>           | 205552_s_at | 2',5'-oligoadenylate synthetase 1, 40/46kDa                                          | 4.98  | 4.29  |
| <i>OAS1</i>           | 202869_at   | 2',5'-oligoadenylate synthetase 1, 40/46kDa                                          | 4.08  | 3.91  |
| <i>OAS2</i>           | 204972_at   | 2'-5'-oligoadenylate synthetase 2, 69/71kDa                                          | 3.89  | 3.50  |
| <i>OAS2</i>           | 206553_at   | 2'-5'-oligoadenylate synthetase 2, 69/71kDa                                          | 1.99  | 1.93  |
| <i>OAS3</i>           | 218400_at   | 2'-5'-oligoadenylate synthetase 3, 100kDa                                            | 4.12  | 4.48  |
| <i>OASL</i>           | 205660_at   | 2'-5'-oligoadenylate synthetase-like                                                 | 4.88  | 4.56  |
| <i>OASL</i>           | 210797_s_at | 2'-5'-oligoadenylate synthetase-like                                                 | 2.90  | 4.02  |
| <i>OLFM1</i>          | 213131_at   | olfactomedin 1                                                                       | -1.62 | -2.34 |
| <i>OSBPL10</i>        | 219073_s_at | oxysterol binding protein-like 10                                                    | -1.88 | -1.47 |
| <i>P2RX5</i>          | 210448_s_at | purinergic receptor P2X, ligand-gated ion channel, 5                                 | -1.63 | -1.33 |
| <i>P2RY5</i>          | 218589_at   | purinergic receptor P2Y, G-protein coupled, 5                                        | 1.46  | 1.24  |
| <i>PABPC4</i>         | 201064_s_at | poly(A) binding protein, cytoplasmic 4 (inducible form)                              | -1.40 | -1.53 |
| <i>PAPSS2</i>         | 203060_s_at | 3'-phosphoadenosine 5'-phosphosulfate synthase 2                                     | -1.40 | -1.73 |
| <i>PARP11</i>         | 220315_at   | poly (ADP-ribose) polymerase family, member 11                                       | 1.14  | 1.60  |
| <i>PARP12</i>         | 218543_s_at | poly (ADP-ribose) polymerase family, member 12                                       | 2.06  | 2.44  |
| <i>PCBP2</i>          | 213264_at   | poly(rC) binding protein 2                                                           | -1.53 | -1.16 |
|                       |             | phosphodiesterase 4B, cAMP-specific (phosphodiesterase E4 dunce homolog, Drosophila) | -1.42 | 1.01  |
| <i>PDE4B</i>          | 215671_at   |                                                                                      |       |       |
|                       |             | phosphodiesterase 4B, cAMP-specific (phosphodiesterase E4 dunce homolog, Drosophila) | -1.39 | -1.13 |
| <i>PDE4B</i>          | 203708_at   |                                                                                      |       |       |
| <i>PF4</i>            | 206390_x_at | platelet factor 4 (chemokine (C-X-C motif) ligand 4)                                 | 1.12  | 1.70  |
| <i>PGAP1</i>          | 213469_at   | GPI deacylase                                                                        | 2.05  | 2.00  |
| <i>PGAP1</i>          | 220576_at   | GPI deacylase                                                                        | 1.92  | 1.91  |
| <i>PHF11</i>          | 221816_s_at | PHD finger protein 11                                                                | 1.44  | 1.80  |
| <i>PID1</i>           | 219093_at   | phosphotyrosine interaction domain containing 1                                      | -1.35 | -1.96 |
| <i>PLAC8</i>          | 219014_at   | placenta-specific 8                                                                  | 1.57  | 1.85  |
| <i>PLAGL2</i>         | 202925_s_at | pleiomorphic adenoma gene-like 2                                                     | 1.56  | 1.33  |
| <i>PLSCR1</i>         | 202446_s_at | phospholipid scramblase 1                                                            | 3.03  | 3.06  |
| <i>PLSCR1</i>         | 202430_s_at | phospholipid scramblase 1                                                            | 3.09  | 2.60  |
| <i>POU2AF1</i>        | 205267_at   | POU class 2 associating factor 1                                                     | -1.70 | -1.51 |
| <i>PTPRO</i>          | 208121_s_at | protein tyrosine phosphatase, receptor type, O                                       | 1.76  | 1.72  |
| <i>QARS</i>           | 217846_at   | glutamyl-tRNA synthetase                                                             | -1.34 | -1.56 |
| <i>RABGAP1L</i>       | 213982_s_at | RAB GTPase activating protein 1-like                                                 | 1.13  | 1.61  |
| <i>RGL1</i>           | 209568_s_at | ral guanine nucleotide dissociation stimulator-like 1                                | 1.58  | 1.54  |
| <i>RGS1</i>           | 216834_at   | regulator of G-protein signaling 1                                                   | -1.77 | -1.43 |
| <i>RHOB</i>           | 212099_at   | ras homolog gene family, member B                                                    | 1.37  | 1.65  |
| <i>RHOBTB1</i>        | 212651_at   | Rho-related BTB domain containing 1                                                  | 1.13  | 2.50  |
| <i>RIN2</i>           | 209684_at   | Ras and Rab interactor 2                                                             | 2.24  | 1.53  |
|                       |             | ribonuclease, RNase A family, 2 (liver, eosinophil-derived neurotoxin)               | 2.38  | 2.86  |
| <i>RNASE2</i>         | 206111_at   |                                                                                      |       |       |
| <i>RPL10L</i>         | 217559_at   | ribosomal protein L10-like                                                           | -1.52 | -1.76 |

|                  |               |                                                                                             |       |       |
|------------------|---------------|---------------------------------------------------------------------------------------------|-------|-------|
| <i>RPL22</i>     | 214042_s_at   | ribosomal protein L22                                                                       | -1.38 | -1.52 |
| <i>RPL3</i>      | 211666_x_at   | ribosomal protein L3                                                                        | -1.37 | -1.51 |
| <i>RPL4</i>      | 200089_s_at   | ribosomal protein L4                                                                        | -1.45 | -1.56 |
| <i>RPL4</i>      | 211710_x_at   | ribosomal protein L4                                                                        | -1.53 | -1.58 |
| <i>RPL4</i>      | 201154_x_at   | ribosomal protein L4                                                                        | -1.56 | -1.63 |
| <i>RPS5</i> ///  |               |                                                                                             |       |       |
| <i>LOC392424</i> | 200024_at     | ribosomal protein S5 /// similar to ribosomal protein S5                                    | -1.45 | -1.56 |
| <i>RRAS</i>      | 212647_at     | related RAS viral (r-ras) oncogene homolog                                                  | 1.59  | 1.92  |
| <i>RSAD2</i>     | 213797_at     | radical S-adenosyl methionine domain containing 2                                           | 11.73 | 12.78 |
| <i>RTN1</i>      | 210222_s_at   | reticulon 1                                                                                 | -1.26 | -2.05 |
| <i>RTN1</i>      | 203485_at     | reticulon 1                                                                                 | -1.32 | -2.17 |
| <i>RTP4</i>      | 219684_at     | receptor (chemosensory) transporter protein 4                                               | 3.33  | 3.13  |
| <i>S100A11</i>   | 200660_at     | S100 calcium binding protein A11                                                            | 1.78  | 1.34  |
| <i>SAMD4A</i>    | 212845_at     | sterile alpha motif domain containing 4A                                                    | 2.78  | 2.77  |
| <i>SAMD4A</i>    | 215495_s_at   | sterile alpha motif domain containing 4A                                                    | 3.51  | 2.56  |
| <i>SAMD9</i>     | 219691_at     | sterile alpha motif domain containing 9                                                     | 3.74  | 3.82  |
| <i>SCARB2</i>    | 201646_at     | scavenger receptor class B, member 2                                                        | 1.62  | 1.13  |
| <i>SCO2</i>      | 205241_at     | SCO cytochrome oxidase deficient homolog 2 (yeast)                                          | 2.34  | 2.28  |
| <i>SEMA3C</i>    | 203789_s_at   | sema domain, immunoglobulin domain (Ig), short basic domain, secreted, (semaphorin) 3C      | -1.46 | -1.66 |
| <i>SEN3</i>      | 215114_at     | SUMO1/sentrin/SMT3 specific peptidase 3                                                     | -1.39 | -1.05 |
| <i>SERPING1</i>  | 200986_at     | serpin peptidase inhibitor, clade G (C1 inhibitor), member 1, (angioedema, hereditary)      | 4.04  | 4.93  |
| <i>SIGLEC1</i>   | 219519_s_at   | sialic acid binding Ig-like lectin 1, sialoadhesin                                          | 15.65 | 27.14 |
| <i>SIGLEC1</i>   | 44673_at      | sialic acid binding Ig-like lectin 1, sialoadhesin                                          | 5.48  | 6.41  |
| <i>SLC25A6</i>   | 212085_at     | solute carrier family 25 (mitochondrial carrier; adenine nucleotide translocator), member 6 | -1.32 | -1.57 |
| <i>SLC27A3</i>   | 222217_s_at   | solute carrier family 27 (fatty acid transporter), member 3                                 | 1.50  | 1.24  |
| <i>SLC31A2</i>   | 204204_at     | solute carrier family 31 (copper transporters), member 2                                    | 2.20  | 1.74  |
| <i>SMCHD1</i>    | 212569_at     | structural maintenance of chromosomes flexible hinge domain containing 1                    | 1.39  | 1.66  |
| <i>SMCHD1</i>    | 212577_at     | structural maintenance of chromosomes flexible hinge domain containing 1                    | 1.41  | 1.58  |
| <i>SMCHD1</i>    | 212579_at     | structural maintenance of chromosomes flexible hinge domain containing 1                    | 1.34  | 1.53  |
| <i>SMOX</i>      | 210357_s_at   | spermine oxidase                                                                            | 1.18  | 1.84  |
| <i>SP100</i>     | 202864_s_at   | SP100 nuclear antigen                                                                       | 1.64  | 1.93  |
| <i>SP100</i>     | 210218_s_at   | SP100 nuclear antigen                                                                       | 1.73  | 1.85  |
| <i>SP100</i>     | 202863_at     | SP100 nuclear antigen                                                                       | 1.53  | 1.77  |
| <i>SP100</i>     | 210985_s_at   | SP100 nuclear antigen                                                                       | 1.42  | 1.66  |
| <i>SP110</i>     | 208012_x_at   | SP110 nuclear body protein                                                                  | 1.75  | 1.94  |
| <i>SP110</i>     | 209762_x_at   | SP110 nuclear body protein                                                                  | 1.80  | 1.87  |
| <i>SP110</i>     | 208392_x_at   | SP110 nuclear body protein                                                                  | 1.64  | 1.72  |
| <i>SP110</i>     | 209761_s_at   | SP110 nuclear body protein                                                                  | 1.60  | 1.70  |
| <i>SPN</i>       | 206057_x_at   | sialophorin (leukosialin, CD43)                                                             | 1.45  | 1.10  |
| <i>SPTLC2</i>    | 216202_s_at   | serine palmitoyltransferase, long chain base subunit 2                                      | 1.68  | 1.92  |
| <i>SPTLC2</i>    | 203127_s_at   | serine palmitoyltransferase, long chain base subunit 2                                      | 1.50  | 1.56  |
| <i>STAT1</i>     | AFFX-HUMISGF3 | signal transducer and activator of transcription 1, 91kDa                                   | 2.38  | 2.57  |
| <i>STAT1</i>     | AFFX-HUMISGF3 | signal transducer and activator of transcription 1, 91kDa                                   | 2.70  | 2.56  |
| <i>STAT1</i>     | AFFX-HUMISGF3 | signal transducer and activator of transcription 1, 91kDa                                   | 2.65  | 2.46  |
| <i>STAT1</i>     | 209969_s_at   | signal transducer and activator of transcription 1, 91kDa                                   | 2.22  | 2.37  |
| <i>STAT1</i>     | AFFX-HUMISGF3 | signal transducer and activator of transcription 1, 91kDa                                   | 1.71  | 1.78  |
| <i>STAT1</i>     | 200887_s_at   | signal transducer and activator of transcription 1, 91kDa                                   | 1.56  | 1.69  |

|                          |             |                                                                                                        |       |       |
|--------------------------|-------------|--------------------------------------------------------------------------------------------------------|-------|-------|
| <i>TAP1</i>              | 202307_s_at | transporter 1, ATP-binding cassette, sub-family B (MDR/TAP)                                            | 1.83  | 2.09  |
| <i>TBC1D9</i>            | 212956_at   | TBC1 domain family, member 9 (with GRAM domain)                                                        | -1.67 | -1.51 |
| <i>TCF3</i>              | 209153_s_at | transcription factor 3 (E2A immunoglobulin enhancer binding factors E12/E47)                           | -1.54 | -1.29 |
| <i>TCF7L2</i>            | 216511_s_at | transcription factor 7-like 2 (T-cell specific, HMG-box)                                               | 1.42  | 1.43  |
| <i>TCF7L2</i>            | 212761_at   | transcription factor 7-like 2 (T-cell specific, HMG-box)                                               | 1.49  | 1.38  |
| <i>TCF7L2</i>            | 212762_s_at | transcription factor 7-like 2 (T-cell specific, HMG-box)                                               | 1.56  | 1.30  |
| <i>TCF7L2</i>            | 216037_x_at | transcription factor 7-like 2 (T-cell specific, HMG-box)                                               | 1.44  | 1.30  |
| <i>TCF7L2</i>            | 216035_x_at | transcription factor 7-like 2 (T-cell specific, HMG-box)                                               | 1.46  | 1.25  |
| <i>TCN2</i>              | 204043_at   | transcobalamin II; macrocytic anemia                                                                   | 1.57  | 2.16  |
| <i>TDRD7</i>             | 213361_at   | tudor domain containing 7                                                                              | 1.77  | 1.64  |
| <i>TFEC</i>              | 206715_at   | transcription factor EC                                                                                | 1.60  | 1.48  |
| <i>THBS1</i>             | 201110_s_at | thrombospondin 1                                                                                       | -1.54 | -1.61 |
| <i>TLR1</i>              | 210176_at   | toll-like receptor 1                                                                                   | 1.61  | 1.59  |
| <i>TLR7</i>              | 220146_at   | toll-like receptor 7                                                                                   | 2.65  | 2.24  |
| <i>TMEM140</i>           | 218999_at   | transmembrane protein 140                                                                              | 1.73  | 2.41  |
| <i>TMOD3</i>             | 220800_s_at | tropomodulin 3 (ubiquitous)                                                                            | 1.29  | 1.63  |
| <i>TNFAIP3</i>           | 202643_s_at | tumor necrosis factor, alpha-induced protein 3                                                         | -1.74 | -1.09 |
| <i>TNFAIP3</i>           | 202644_s_at | tumor necrosis factor, alpha-induced protein 3                                                         | -1.40 | -1.16 |
| <i>TNFAIP6</i>           | 206026_s_at | tumor necrosis factor, alpha-induced protein 6                                                         | 1.81  | 2.07  |
| <i>TNFSF10</i>           | 202687_s_at | tumor necrosis factor (ligand) superfamily, member 10                                                  | 3.10  | 2.34  |
| <i>TNFSF10</i>           | 202688_at   | tumor necrosis factor (ligand) superfamily, member 10                                                  | 2.36  | 2.04  |
| <i>TNFSF10</i>           | 214329_x_at | tumor necrosis factor (ligand) superfamily, member 10                                                  | 2.96  | 2.01  |
| <i>TOR1B</i>             | 209593_s_at | torsin family 1, member B (torsin B)                                                                   | 1.98  | 1.89  |
| <i>TPD52</i>             | 201690_s_at | tumor protein D52                                                                                      | -1.46 | -1.09 |
| <i>TPMT</i>              | 203672_x_at | thiopurine S-methyltransferase                                                                         | 1.63  | 1.22  |
| <i>TRAFD1</i>            | 202837_at   | TRAF-type zinc finger domain containing 1                                                              | 1.91  | 1.99  |
| <i>TREX1</i>             | 205875_s_at | three prime repair exonuclease 1                                                                       | 2.17  | 1.97  |
| <i>TREX1</i>             | 34689_at    | three prime repair exonuclease 1                                                                       | 1.70  | 1.39  |
| <i>TRIM14</i>            | 203148_s_at | tripartite motif-containing 14                                                                         | 1.57  | 1.51  |
| <i>TRIM21</i>            | 204804_at   | tripartite motif-containing 21                                                                         | 1.54  | 1.64  |
| <i>TRIM22</i>            | 213293_s_at | tripartite motif-containing 22                                                                         | 1.61  | 1.72  |
| <i>TRIM34 /// TRIM6-</i> |             | tripartite motif-containing 34 /// tripartite motif-containing 6                                       |       |       |
| <i>TRIM34</i>            | 221044_s_at | and tripartite motif-containing 34                                                                     | 1.69  | 1.69  |
| <i>TRIM38</i>            | 203610_s_at | tripartite motif-containing 38                                                                         | 1.64  | 1.82  |
| <i>TRIM38</i>            | 203567_s_at | tripartite motif-containing 38                                                                         | 1.59  | 1.63  |
| <i>TRIM5</i>             | 210705_s_at | tripartite motif-containing 5                                                                          | 2.41  | 1.81  |
| <i>TRIP6</i>             | 209129_at   | thyroid hormone receptor interactor 6                                                                  | 1.19  | 1.57  |
| <i>UBE2L6</i>            | 201649_at   | ubiquitin-conjugating enzyme E2L 6                                                                     | 1.92  | 1.91  |
| <i>UNC119B</i>           | 202365_at   | unc-119 homolog B (C. elegans)                                                                         | -1.31 | -1.58 |
| <i>USP18 ///</i>         |             |                                                                                                        |       |       |
| <i>LOC727996 ///</i>     |             |                                                                                                        |       |       |
| <i>LOC728216 ///</i>     |             | ubiquitin specific peptidase 18 /// similar to ubiquitin specific                                      |       |       |
| <i>LOC728438</i>         | 219211_at   | peptidase 18                                                                                           | 5.64  | 7.43  |
| <i>UTRN</i>              | 213023_at   | utrophin                                                                                               | 1.44  | 1.51  |
| <i>VDR</i>               | 204255_s_at | vitamin D (1,25- dihydroxyvitamin D3) receptor                                                         | 1.23  | 1.60  |
| <i>WSB1</i>              | 210561_s_at | WD repeat and SOCS box-containing 1                                                                    | 1.35  | 1.52  |
| <i>XAF1</i>              | 206133_at   | XIAP associated factor-1                                                                               | 3.15  | 4.25  |
| <i>ZBP1</i>              | 208087_s_at | Z-DNA binding protein 1                                                                                | 2.29  | 3.03  |
| <i>ZCCHC2</i>            | 219062_s_at | zinc finger, CCHC domain containing 2                                                                  | 1.94  | 2.26  |
| <i>ZNF322B</i>           | 219376_at   | zinc finger protein 322B                                                                               | 1.36  | 1.46  |
| ---                      | 213294_at   | Full-length cDNA clone CS0DK002YF13 of HeLa cells Cot                                                  | 2.83  | 3.34  |
| ---                      | 215617_at   | 25-normalized of Homo sapiens (human)<br>CDNA FLJ11754 fis, clone HEMBA1005588                         | 2.01  | 3.12  |
| ---                      | 216297_at   | MRNA; cDNA DKFZp564C156 (from clone DKFZp564C156)<br>AF034176 Human mRNA (Tripodis and Ragoussis) Homo | -1.40 | -1.11 |
| ---                      | 212605_s_at | sapiens cDNA clone ntcon5 contig                                                                       | -1.15 | -1.60 |

Note: all genes were significantly affected by the interferon at day 3 (p<0.001)
