# Supplementary material for: Cyclic changes in gene expression induced by Peg-interferon alfa-2b plus ribavirin in peripheral blood monocytes (PBMC) of hepatitis C patients during the first 10 weeks of treatment
Source: J Transl Med. 2008 Nov 5;6:66. doi: 10.1186/1479-5876-6-66 (PMC2613871; doi:10.1186/1479-5876-6-66)
Supplement: Additional file 1 — List of genes with significant differential expression for at least one time point [file 1479-5876-6-66-S1.pdf]

Supplementary table 1 (a)\_h\_1

| Genes with significant differential expression for at least one time point. |              |                                                                                                                                                                                                                               | Day 1<br>mean<br>signal | Day 3    |         | Day 6    |         | Day 10   |         | Day 13   |         | Day 27   |         | Day 42   |         | Day 70   |         |
|-----------------------------------------------------------------------------|--------------|-------------------------------------------------------------------------------------------------------------------------------------------------------------------------------------------------------------------------------|-------------------------|----------|---------|----------|---------|----------|---------|----------|---------|----------|---------|----------|---------|----------|---------|
| Gene Symbol                                                                 | Probe Set ID | Gene Title                                                                                                                                                                                                                    |                         | Fold Chg | p-value |
| ABCA1                                                                       | 203505_at    | ATP-binding cassette, sub-family A (ABC1), member 1                                                                                                                                                                           | 359                     | 1.75     | 0.00006 | 1.18     | 0.16047 | 1.37     | 0.00645 | 1.13     | 0.18533 | 1.15     | 0.17553 | 1.12     | 0.29663 | 1.29     | 0.03224 |
| ABCC3                                                                       | 208161_s_at  | ATP-binding cassette, sub-family C (CFTR/MRP), member 3                                                                                                                                                                       | 432                     | 1.66*    | 0.00006 | ND       |         |
| ABHD2                                                                       | 63825_at     | abhydrolase domain containing 2                                                                                                                                                                                               | 997                     | -1.29    | 0.00497 | -1.19    | 0.03054 | -1.47    | 0.00001 | -1.51    | 0.00030 | -1.64    | 0.00016 | -1.61    | 0.00001 | -1.75    | 0.00001 |
| ADAR                                                                        | 201786_s_at  | adenosine deaminase, RNA-specific                                                                                                                                                                                             | 7548                    | 1.68     | 0.00000 | 1.5      | 0.00000 | 1.64     | 0.00000 | 1.47     | 0.00000 | 1.43     | 0.00000 | 1.38     | 0.00019 | 1.42     | 0.00000 |
| ADK                                                                         | 204120_s_at  | adenosine kinase                                                                                                                                                                                                              | 162                     | -1.54    | 0.00007 | -1.33    | 0.01659 | -1.27    | 0.01893 | -1.39    | 0.01355 | -1.14    | 0.21761 | -1.14    | 0.28551 | -1.42    | 0.00116 |
| ADM                                                                         | 202912_at    | adrenomedullin                                                                                                                                                                                                                | 770                     | 1.84     | 0.00097 | 1.27     | 0.12805 | 1.47     | 0.02847 | 1        | 0.98585 | 1.28     | 0.07742 | 1.13     | 0.31173 | 1.55     | 0.00139 |
| AGRN                                                                        | 212285_s_at  | agrin                                                                                                                                                                                                                         | 432                     | 2.11     | 0.00000 | 1.69     | 0.00016 | 2.07     | 0.00000 | 1.86     | 0.00000 | 1.59     | 0.00003 | 1.73     | 0.00004 | 2.14     | 0.00000 |
| AHR                                                                         | 202820_at    | aryl hydrocarbon receptor                                                                                                                                                                                                     | 609                     | -1.26    | 0.02184 | -1.27    | 0.02097 | -1.34    | 0.01917 | -1.48    | 0.00341 | -1.56    | 0.00052 | -1.29    | 0.01896 | -1.63    | 0.00021 |
| AIM2                                                                        | 206513_at    | absent in melanoma 2                                                                                                                                                                                                          | 1078                    | 1.64     | 0.00000 | -1.04    | 0.57488 | 1.18     | 0.01329 | -1.06    | 0.43730 | -1.06    | 0.45846 | -1.02    | 0.71671 | -1.07    | 0.45239 |
| AKAP2 /// PALM2-AKAP2                                                       | 202760_s_at  | A kinase (PRKA) anchor protein 2 /// PALM2-AKAP2 protein                                                                                                                                                                      | 711                     | 1.53     | 0.00010 | 1.42     | 0.00023 | 1.74     | 0.00003 | 1.33     | 0.00679 | 1.45     | 0.00081 | 1.17     | 0.17255 | 1.53     | 0.00002 |
| ALDH1A1                                                                     | 212224_at    | aldehyde dehydrogenase 1 family, member A1                                                                                                                                                                                    | 729                     | -1.45    | 0.00001 | -1.72    | 0.00000 | -1.74    | 0.00000 | -2.03    | 0.00000 | -2.48    | 0.00000 | -2.47    | 0.00000 | -2.57    | 0.00000 |
| ALDH2                                                                       | 201425_at    | aldehyde dehydrogenase 2 family (mitochondrial)                                                                                                                                                                               | 6406                    | -1.45    | 0.00000 | -1.46    | 0.00000 | -1.55    | 0.00000 | -1.48    | 0.00000 | -1.52    | 0.00001 | -1.52    | 0.00004 | -1.45    | 0.00001 |
| AMY1A /// AMY1B /// AMY1C /// AMY2A /// AMY2B /// LOC730924                 | 208498_s_at  | amylase, alpha 1A (salivary) /// alpha 1B (salivary) /// alpha 1C (salivary) /// alpha 2A (pancreatic) /// alpha 2B (pancreatic) /// similar to Pancreatic alpha-amylase precursor (PA) (1,4-alpha-D-glucan glucanohydrolase) | 407                     | 1.05     | 0.35348 | 1.52     | 0.00082 | 1.22     | 0.05446 | 1.17     | 0.18637 | 1.26     | 0.00578 | 1.27     | 0.06444 | 1.21     | 0.12182 |
| ANP32A                                                                      | 201043_s_at  | acidic (leucine-rich) nuclear phosphoprotein 32 family, member A                                                                                                                                                              | 575                     | -1.08    | 0.41214 | -1.07    | 0.52163 | -1.3     | 0.03065 | -1.21    | 0.14439 | -1.44    | 0.00388 | -1.34    | 0.02000 | -1.73    | 0.00004 |
| APOBEC3A                                                                    | 210873_x_at  | apolipoprotein B mRNA editing enzyme, catalytic polypeptide-like 3A                                                                                                                                                           | 2075                    | 2.94     | 0.00000 | 2.01     | 0.00001 | 2.72     | 0.00000 | 1.88     | 0.00103 | 1.87     | 0.00011 | 1.81     | 0.00009 | 2        | 0.00000 |
| ARRB1                                                                       | 218832_x_at  | arrestin, beta 1                                                                                                                                                                                                              | 350                     | 1.68*    | 0.00008 | ND       |         |
| ASGR1                                                                       | 206743_s_at  | asialoglycoprotein receptor 1                                                                                                                                                                                                 | 478                     | -1.08    | 0.23139 | -1.19#   | 0.02344 | -1.18#   | 0.04365 | -1.31#   | 0.00360 | -1.56#   | 0.00003 | -1.37#   | 0.01383 | -1.41#   | 0.00072 |
| ATG12                                                                       | 204833_at    | ATG12 autophagy related 12 homolog (S. cerevisiae)                                                                                                                                                                            | 205                     | 1.93*    | 0.00002 | 1.58*    | 0.00012 | ND       |         |
| ATOX1                                                                       | 203454_s_at  | ATX1 antioxidant protein 1 homolog (yeast)                                                                                                                                                                                    | 909                     | 1.58*    | 0.00000 | 1.12*    | 0.12292 | 1.47*    | 0.00190 | 1.13*    | 0.17205 | ND       |         | 1.24*    | 0.02927 | 1.18*    | 0.03486 |
| ATP10A                                                                      | 214255_at    | ATPase, Class V, type 10A                                                                                                                                                                                                     | 447                     | 1.43     | 0.00189 | 1.39     | 0.00500 | 1.47     | 0.00030 | 1.48     | 0.00005 | 1.5      | 0.00014 | 1.66     | 0.00042 | 1.4      | 0.00304 |
| ATP6V1B2                                                                    | 201089_at    | ATPase, H+ transporting, lysosomal 56/58kDa, V1 subunit B2                                                                                                                                                                    | 6801                    | -1.23    | 0.01018 | -1.43    | 0.00054 | -1.37    | 0.00105 | -1.27    | 0.00003 | -1.65    | 0.00000 | -1.42    | 0.00008 | -1.82    | 0.00000 |
| ATXN1                                                                       | 203231_s_at  | ataxin 1                                                                                                                                                                                                                      | 656                     | -1.58    | 0.00004 | -1.08    | 0.20372 | -1.31    | 0.00049 | -1.2     | 0.04337 | -1.26    | 0.07173 | -1.15    | 0.20957 | -1.2     | 0.08740 |
| AXL                                                                         | 202686_s_at  | AXL receptor tyrosine kinase                                                                                                                                                                                                  | 192                     | ND       |         | ND       |         | 2.36*    | 0.00000 | ND       |         | ND       |         | ND       |         | ND       |         |
| BCAT2                                                                       | 203576_at    | branched chain aminotransferase 2, mitochondrial                                                                                                                                                                              | 535                     | -1.31#   | 0.00241 | -1.27#   | 0.00908 | -1.65#   | 0.00005 | -1.18    | 0.06991 | -1.29#   | 0.00872 | -1.22#   | 0.10360 | -1.56#   | 0.00025 |
| BICD2                                                                       | 212702_s_at  | bicaudal D homolog 2 (Drosophila)                                                                                                                                                                                             | 1493                    | -1.25    | 0.00026 | -1.2     | 0.03693 | -1.28    | 0.00086 | -1.28    | 0.02563 | -1.51    | 0.00001 | -1.47    | 0.00046 | -1.48    | 0.00097 |
| BID                                                                         | 204493_at    | BH3 interacting domain death agonist                                                                                                                                                                                          | 1429                    | 1.09     | 0.16140 | -1.14    | 0.07514 | -1.19    | 0.01781 | -1.29    | 0.00477 | -1.38    | 0.00007 | -1.38    | 0.00005 | -1.54    | 0.00000 |
| BLVRA                                                                       | 203771_s_at  | biliverdin reductase A                                                                                                                                                                                                        | 591                     | 1.63     | 0.00000 | 1.35     | 0.00077 | 1.74     | 0.00000 | 1.33     | 0.04107 | 1.33     | 0.00430 | 1.37     | 0.00428 | 1.43     | 0.00015 |
| BLVRA                                                                       | 211729_x_at  | biliverdin reductase A                                                                                                                                                                                                        | 4388                    | 1.61     | 0.00000 | 1.2      | 0.04307 | 1.63     | 0.00003 | 1.34     | 0.01107 | 1.34     | 0.00366 | 1.39     | 0.00650 | 1.37     | 0.00038 |
| BLVRA                                                                       | 203773_x_at  | biliverdin reductase A                                                                                                                                                                                                        | 4704                    | 1.55     | 0.00003 | 1.15     | 0.20750 | 1.52     | 0.00050 | 1.28     | 0.09852 | 1.19     | 0.11865 | 1.3      | 0.04536 | 1.19     | 0.13127 |
| BST2                                                                        | 201641_at    | bone marrow stromal cell antigen 2                                                                                                                                                                                            | 2224                    | 2.06     | 0.00000 | 1.59     | 0.00000 | 1.96     | 0.00000 | 1.6      | 0.00007 | 1.41     | 0.00138 | 1.55     | 0.00128 | 1.5      | 0.00015 |
| C11orf2                                                                     | 217969_at    | chromosome 11 open reading frame2                                                                                                                                                                                             | 5350                    | -1.63    | 0.00000 | -1.43    | 0.00000 | -1.68    | 0.00000 | -1.42    | 0.00001 | -1.32    | 0.00005 | -1.3     | 0.00022 | -1.44    | 0.00001 |
| C14orf147                                                                   | 213508_at    | chromosome 14 open reading frame 147                                                                                                                                                                                          | 1049                    | -1.34    | 0.00122 | -1.41    | 0.00038 | -1.54#   | 0.00007 | -1.34    | 0.00225 | -1.58#   | 0.00000 | -1.45#   | 0.00029 | -1.75#   | 0.00001 |
| C1GALT1                                                                     | 219439_at    | core 1 synthase, glycoprotein-N-acetylglucosamine 3-beta-galactosyltransferase, 1                                                                                                                                             | 425                     | 1.55     | 0.00000 | 1.35     | 0.00002 | 1.48     | 0.00001 | 1.34     | 0.00003 | 1.31     | 0.00000 | 1.31     | 0.00006 | 1.31     | 0.00008 |
| C1QA                                                                        | 218232_at    | complement component 1, q subcomponent, A chain                                                                                                                                                                               | 381                     | 1.63*    | 0.00048 | ND       |         | 1.35*    | 0.02319 | ND       |         | ND       |         | ND       |         | 1.10*    | 0.25983 |
| C1QB                                                                        | 202953_at    | complement component 1, q subcomponent, B chain                                                                                                                                                                               | 269                     | 1.97*    | 0.00000 | ND       |         |
| C2                                                                          | 203052_at    | complement component 2                                                                                                                                                                                                        | 389                     | 1.66*    | 0.00000 | 1.14*    | 0.21241 | 1.46*    | 0.00022 | 1.14*    | 0.14268 | 1.08*    | 0.40375 | 1.20*    | 0.09251 | 1.18*    | 0.01252 |
| C2orf47                                                                     | 219176_at    | chromosome 2 open reading frame 47                                                                                                                                                                                            | 851                     | 1.71     | 0.00000 | 1.41     | 0.00014 | 1.72     | 0.00000 | 1.54     | 0.00000 | 1.32     | 0.00025 | 1.27     | 0.00202 | 1.34     | 0.00234 |
| C3AR1                                                                       | 209906_at    | complement component 3a receptor 1                                                                                                                                                                                            | 2635                    | 2.27     | 0.00001 | 1.3      | 0.09530 | 1.92     | 0.00240 | 1.39     | 0.03361 | 1.11     | 0.41143 | 1.31     | 0.07757 | 1.16     | 0.31333 |
| C4orf18                                                                     | 219872_at    | chromosome 4 open reading frame 18                                                                                                                                                                                            | 419                     | -1.32    | 0.00813 | -1.31    | 0.05437 | -1.39    | 0.01428 | -1.59    | 0.00315 | -1.72    | 0.00049 | -1.53    | 0.01376 | -1.95    | 0.00044 |
| C9orf40                                                                     | 218904_s_at  | chromosome 9 open reading frame 40                                                                                                                                                                                            | 155                     | 1.15*    | 0.16058 | 1.11*    | 0.28196 | 1.27*    | 0.02975 | 1.80*    | 0.00039 | 1.47*    | 0.00856 | 1.56*    | 0.00990 | 1.42*    | 0.07017 |
| CA1                                                                         | 205950_s_at  | carbonic anhydrase I                                                                                                                                                                                                          | 679                     | -1.41    | 0.08929 | 1.11     | 0.62325 | 3.83     | 0.00466 | 8.88     | 0.04929 | 13.87    | 0.00135 | 15.16    | 0.00727 | 21.24    | 0.00074 |
| CALML4                                                                      | 221879_at    | calmodulin-like 4                                                                                                                                                                                                             | 1012                    | 1.72*    | 0.00000 | ND       |         | 1.34*    | 0.00241 | ND       |         | ND       |         | ND       |         | ND       |         |
| CALML4                                                                      | 64408_s_at   | calmodulin-like 4                                                                                                                                                                                                             | 223                     | 1.83     | 0.00001 | 1.03     | 0.60859 | 1.4      | 0.00131 | 1.01     | 0.86013 | 1.04     | 0.67167 | 1.02     | 0.89067 | 1.12     | 0.25042 |
| CAPN3                                                                       | 214475_x_at  | calpain 3, (p94)                                                                                                                                                                                                              | 301                     | 1.49*    | 0.00024 | 1.54*    | 0.00025 | 1.37*    | 0.01667 | ND       |         | ND       |         | ND       |         | ND       |         |
| CBR1                                                                        | 209213_at    | carbonyl reductase 1                                                                                                                                                                                                          | 410                     | 1.73     | 0.00009 | 1.21     | 0.15141 | 1.58     | 0.00015 | 1.48     | 0.00354 | 1.07     | 0.60176 | 1.19     | 0.23581 | 1.12     | 0.42149 |
| CCNG2                                                                       | 202770_s_at  | cyclin G2                                                                                                                                                                                                                     | 793                     | -1.18    | 0.03832 | -1.21    | 0.03053 | -1.26    | 0.02758 | -1.21    | 0.02549 | -1.32    | 0.00386 | -1.26    | 0.03819 | -1.59    | 0.00028 |
| CCR1                                                                        | 205099_s_at  | chemokine (C-C motif) receptor 1                                                                                                                                                                                              | 940                     | 2.06     | 0.00000 | 1.42     | 0.00804 | 2.04     | 0.00000 | 1.74     | 0.00006 | 1.43     | 0.00456 | 1.5      | 0.00162 | 1.45     | 0.00233 |
| CCR1                                                                        | 205098_at    | chemokine (C-C motif) receptor 1                                                                                                                                                                                              | 2924                    | 1.89     | 0.00001 | 1.26     | 0.15310 | 1.83     | 0.00094 | 1.75     | 0.00014 | 1.21     | 0.02645 | 1.54     | 0.00115 | 1.16     | 0.33288 |

Supplementary table 1 (a)\_h\_j1

| Gene Symbol                                                     | Probe Set ID | Gene Title                                                                                                                                                                       | Day 1<br>mean<br>signal | Day 3    |         | Day 6    |         | Day 10   |         | Day 13   |         | Day 27   |         | Day 42   |         | Day 70   |         |
|-----------------------------------------------------------------|--------------|----------------------------------------------------------------------------------------------------------------------------------------------------------------------------------|-------------------------|----------|---------|----------|---------|----------|---------|----------|---------|----------|---------|----------|---------|----------|---------|
|                                                                 |              |                                                                                                                                                                                  |                         | Fold Chg | p-value |
| <i>CCR2</i> ///<br><i>LOC729230</i>                             | 206978_at    | chemokine (C-C motif) receptor 2 /// similar to C-C chemokine receptor type 2 (C-C CKR-2) (CCR-2) (CCR2) (Monocyte chemoattractant protein 1 receptor) (MCP-1-R) (CD192 antigen) | 4664                    | -1.36    | 0.07241 | -1.37    | 0.09056 | -1.36    | 0.09553 | -1.14    | 0.33118 | -1.76    | 0.00017 | -1.25    | 0.13419 | -1.91    | 0.00714 |
| <i>CD1C</i>                                                     | 205987_at    | CD1c molecule                                                                                                                                                                    | 1300                    | -2.51#   | 0.00000 | -1.82#   | 0.00000 | -1.89#   | 0.00000 | -1.57#   | 0.00028 | -1.28#   | 0.00217 | -1.48#   | 0.00006 | -1.57#   | 0.00000 |
| <i>CD2AP</i>                                                    | 203593_at    | CD2-associated protein                                                                                                                                                           | 549                     | 1.63     | 0.00000 | 1.42     | 0.00005 | 1.67     | 0.00001 | 1.45     | 0.00089 | 1.45     | 0.00000 | 1.49     | 0.00000 | 1.48     | 0.00000 |
| <i>CD302</i>                                                    | 203799_at    | CD302 molecule                                                                                                                                                                   | 5393                    | -1.46    | 0.00007 | -1.56    | 0.00008 | -1.57    | 0.00001 | -1.43    | 0.00019 | -1.51    | 0.00002 | -1.37    | 0.00033 | -1.41    | 0.00005 |
| <i>CD33</i>                                                     | 206120_at    | CD33 molecule                                                                                                                                                                    | 1564                    | -1.02    | 0.83604 | -1.43    | 0.00218 | -1.36    | 0.00760 | -1.44    | 0.00234 | -1.63    | 0.00009 | -1.35    | 0.03709 | -1.57    | 0.00080 |
| <i>CD38</i>                                                     | 205692_s_at  | CD38 molecule                                                                                                                                                                    | 994                     | 1.95     | 0.00000 | 1.34     | 0.00082 | 1.67     | 0.00005 | 1.3      | 0.01166 | 1.19     | 0.12365 | 1.16     | 0.22909 | 1.25     | 0.00448 |
| <i>CD44</i>                                                     | 212014_x_at  | CD44 molecule (Indian blood group)                                                                                                                                               | 6681                    | -1.5     | 0.00001 | -1.37    | 0.00053 | -1.57    | 0.00000 | -1.6     | 0.00001 | -1.42    | 0.00005 | -1.49    | 0.00003 | -1.34    | 0.00088 |
| <i>CD44</i>                                                     | 209835_x_at  | CD44 molecule (Indian blood group)                                                                                                                                               | 8053                    | -1.56    | 0.00000 | -1.35    | 0.00068 | -1.49    | 0.00002 | -1.52    | 0.00013 | -1.33    | 0.00012 | -1.4     | 0.00036 | -1.39    | 0.00009 |
| <i>CD93</i>                                                     | 202878_s_at  | CD93 molecule                                                                                                                                                                    | 5776                    | -1.29    | 0.00124 | -1.41    | 0.00041 | -1.43    | 0.00043 | -1.32    | 0.00128 | -1.52    | 0.00000 | -1.33    | 0.00846 | -1.44    | 0.00065 |
| <i>CDKN1C</i>                                                   | 213182_x_at  | cyclin-dependent kinase inhibitor 1C (p57, Kip2)                                                                                                                                 | 846                     | 1.81     | 0.00016 | -1.97#   | 0.00015 | -1.12    | 0.34801 | -2.07#   | 0.00035 | -1.85    | 0.00105 | -1.90#   | 0.00419 | -2.18#   | 0.00030 |
| <i>CDKN1C</i>                                                   | 213348_at    | cyclin-dependent kinase inhibitor 1C (p57, Kip2)                                                                                                                                 | 2473                    | 1.88     | 0.00000 | -2.11    | 0.00000 | -1.1     | 0.29000 | -1.73    | 0.00000 | -1.69    | 0.00001 | -1.69    | 0.00006 | -1.66    | 0.00001 |
| <i>CDKN1C</i>                                                   | 216894_x_at  | cyclin-dependent kinase inhibitor 1C (p57, Kip2)                                                                                                                                 | 813                     | 2.21     | 0.00002 | -2.44    | 0.00001 | -1.16    | 0.37159 | -1.99    | 0.00298 | -2.08    | 0.00049 | -2.02    | 0.00294 | -2.05    | 0.00223 |
| <i>CDKN1C</i>                                                   | 219534_x_at  | cyclin-dependent kinase inhibitor 1C (p57, Kip2)                                                                                                                                 | 1148                    | 2.2      | 0.00003 | -2.47    | 0.00001 | -1.18    | 0.24011 | -2.03    | 0.00080 | -2.17    | 0.00034 | -1.98    | 0.00129 | -2.19    | 0.00073 |
| <i>CES1</i>                                                     | 209616_s_at  | carboxylesterase 1 (monocyte/macrophage serine esterase 1)                                                                                                                       | 941                     | 2.06     | 0.00000 | 1.27     | 0.00162 | 1.91     | 0.00002 | 1.47     | 0.00078 | 1.33     | 0.01051 | 1.5      | 0.04238 | 1.54     | 0.00845 |
| <i>CHKB</i> /// <i>CPT1B</i>                                    | 210069_at    | choline kinase beta /// carnitine palmitoyltransferase 1B (muscle)                                                                                                               | 739                     | 1.29     | 0.00004 | 1.47     | 0.00001 | 1.42     | 0.00007 | 1.41     | 0.00000 | 1.53     | 0.00000 | 1.72     | 0.01064 | 1.77     | 0.00000 |
| <i>CHMP5</i>                                                    | 219356_s_at  | chromatin modifying protein 5                                                                                                                                                    | 1478                    | 2.78     | 0.00000 | 1.93     | 0.00000 | 2.63     | 0.00000 | 2.03     | 0.00002 | 1.88     | 0.00003 | 1.8      | 0.00005 | 1.92     | 0.00000 |
| <i>CHMP5</i>                                                    | 218085_at    | chromatin modifying protein 5                                                                                                                                                    | 692                     | 2.56     | 0.00000 | 1.69     | 0.00003 | 2.43     | 0.00000 | 1.83     | 0.00004 | 1.52     | 0.00005 | 1.76     | 0.00001 | 1.62     | 0.00003 |
| <i>CHST12</i>                                                   | 218927_s_at  | carbohydrate (chondroitin 4) sulfotransferase 12                                                                                                                                 | 1538                    | 1.58     | 0.00000 | 1.2      | 0.00114 | 1.52     | 0.00022 | 1.39     | 0.00006 | 1.24     | 0.01121 | 1.29     | 0.00243 | 1.23     | 0.01747 |
| <i>CIITA</i>                                                    | 205101_at    | class II, major histocompatibility complex, transactivator                                                                                                                       | 707                     | -1.74#   | 0.00000 | -1.38#   | 0.00266 | -1.63#   | 0.00000 | -1.43#   | 0.00141 | -1.28#   | 0.00337 | -1.36#   | 0.00059 | -1.45#   | 0.00001 |
| <i>CLIC5</i>                                                    | 213317_at    | chloride intracellular channel 5                                                                                                                                                 | 208                     | -1.79#   | 0.00038 | -1.17    | 0.33599 | -1.3     | 0.02574 | -1.42    | 0.00828 | -1.36    | 0.00822 | -1.44#   | 0.00865 | -1.71#   | 0.00037 |
| <i>CLU</i>                                                      | 208792_s_at  | clusterin                                                                                                                                                                        | 1057                    | 1.62     | 0.00005 | -1.1     | 0.41693 | 1.51     | 0.00684 | -1.12    | 0.43963 | -1.1     | 0.33045 | 1        | 0.97406 | 1.35     | 0.02369 |
| <i>CMKLR1</i>                                                   | 207652_s_at  | chemokine-like receptor 1                                                                                                                                                        | 341                     | 2.03*    | 0.00000 | ND       | ND      |
| <i>CMKLR1</i>                                                   | 210659_at    | chemokine-like receptor 1                                                                                                                                                        | 349                     | 1.69*    | 0.00000 | ND       | ND      | 1.44*    | 0.00004 | ND       | ND      | ND       | ND      | ND       | ND      | 1.40*    | 0.00007 |
| <i>CNP</i>                                                      | 208912_s_at  | 2',3'-cyclic nucleotide 3' phosphodiesterase                                                                                                                                     | 1503                    | 1.37*    | 0.00001 | 1.10*    | 0.12872 | 1.50*    | 0.00000 | 1.39*    | 0.00008 | 1.24*    | 0.00068 | 1.32*    | 0.00192 | 1.36*    | 0.00004 |
| <i>COL6A2</i>                                                   | 209156_s_at  | collagen, type VI, alpha 2                                                                                                                                                       | 565                     | -1.08    | 0.28423 | 1.05     | 0.47226 | -1.37    | 0.00189 | -1.14    | 0.17298 | -1.54    | 0.00005 | -1.39#   | 0.02494 | -1.27    | 0.04430 |
| <i>COX15</i>                                                    | 221550_at    | COX15 homolog, cytochrome c oxidase assembly protein (yeast)                                                                                                                     | 239                     | -1.13    | 0.25508 | -1.56    | 0.01527 | -1.4     | 0.01383 | -1.32    | 0.04235 | -1.53#   | 0.00084 | -1.50#   | 0.00088 | -1.47#   | 0.00288 |
| <i>CPD</i>                                                      | 201942_s_at  | carboxypeptidase D                                                                                                                                                               | 475                     | -1.1     | 0.10638 | -1.24    | 0.00090 | -1.35    | 0.00091 | -1.33    | 0.02211 | -1.53    | 0.00078 | -1.57    | 0.00058 | -1.84    | 0.00012 |
| <i>CPVL</i>                                                     | 208146_s_at  | carboxypeptidase, vitellogenic-like                                                                                                                                              | 4561                    | -1.37    | 0.00061 | -1.54    | 0.00004 | -1.48    | 0.00020 | -1.43    | 0.00033 | -1.65    | 0.00000 | -1.6     | 0.00005 | -1.53    | 0.00006 |
| <i>CRIM1</i>                                                    | 202551_s_at  | cysteine rich transmembrane BMP regulator 1 (chordin-like)                                                                                                                       | 154                     | -1.60#   | 0.00100 | -1.21#   | 0.02097 | -1.30#   | 0.01241 | -1.65#   | 0.00000 | -1.20#   | 0.06283 | -1.23#   | 0.04054 | -1.27#   | 0.05431 |
| <i>CRTAP</i>                                                    | 201380_at    | cartilage associated protein                                                                                                                                                     | 1014                    | -1.52    | 0.00000 | -1.43    | 0.00000 | -1.53    | 0.00000 | -1.39    | 0.00003 | -1.34    | 0.00003 | -1.37    | 0.00001 | -1.49    | 0.00000 |
| <i>CSF1R</i>                                                    | 203104_at    | colony stimulating factor 1 receptor, formerly McDonough feline sarcoma viral (v-fms) oncogene homolog                                                                           | 6075                    | 1.11     | 0.09692 | -1.36    | 0.00005 | -1.16    | 0.01038 | -1.31    | 0.00193 | -1.5     | 0.00000 | -1.39    | 0.00014 | -1.41    | 0.00003 |
| <i>CSF3R</i>                                                    | 203591_s_at  | colony stimulating factor 3 receptor (granulocyte)                                                                                                                               | 2554                    | -1.25    | 0.01115 | -1.3     | 0.01244 | -1.36    | 0.00009 | -1.44    | 0.00157 | -1.72    | 0.00000 | -1.65    | 0.00006 | -1.47    | 0.00277 |
| <i>CTBP1</i>                                                    | 213980_s_at  | C-terminal binding protein 1                                                                                                                                                     | 3019                    | -1.18    | 0.00609 | -1.11    | 0.17033 | -1.24    | 0.04028 | -1.19    | 0.11318 | -1.42    | 0.00083 | -1.17    | 0.08941 | -1.67    | 0.00000 |
| <i>CTSL</i>                                                     | 202087_s_at  | cathepsin L1                                                                                                                                                                     | 771                     | 2.4      | 0.00000 | 1.31     | 0.00084 | 1.82     | 0.00000 | 1.25     | 0.01816 | 1.32     | 0.00181 | 1.4      | 0.01327 | 1.45     | 0.00009 |
| <i>CTSZ</i>                                                     | 210042_s_at  | cathepsin Z                                                                                                                                                                      | 1329                    | -1.35    | 0.06234 | -1.43    | 0.04157 | -1.6     | 0.00571 | -1.83    | 0.00096 | -1.5     | 0.01524 | -2.31    | 0.00023 | -1.76    | 0.00098 |
| <i>CUTL1</i>                                                    | 202367_at    | cut-like 1, CCAAT displacement protein (Drosophila)                                                                                                                              | 1156                    | 1.53     | 0.00001 | -1.24    | 0.01218 | 1.05     | 0.58619 | -1.23    | 0.01092 | -1.25    | 0.00061 | -1.16    | 0.09641 | -1.21    | 0.00453 |
| <i>CXCL10</i>                                                   | 204533_at    | chemokine (C-X-C motif) ligand 10                                                                                                                                                | 703                     | 3.95     | 0.00001 | -1.13    | 0.24698 | 2.39     | 0.00005 | -1.16    | 0.24142 | -1.21    | 0.11369 | -1.03    | 0.78536 | -1.09    | 0.50500 |
| <i>CXCL5</i>                                                    | 214974_x_at  | chemokine (C-X-C motif) ligand 5                                                                                                                                                 | 527                     | -1.02    | 0.83780 | -1.59    | 0.00008 | -1.07    | 0.32346 | -1.68    | 0.00175 | -1.86    | 0.00019 | -1.85    | 0.00025 | -1.4     | 0.00082 |
| <i>CYP1B1</i>                                                   | 202435_s_at  | cytochrome P450, family 1, subfamily B, polypeptide 1                                                                                                                            | 887                     | -1.46    | 0.00004 | -1.29    | 0.00984 | -1.53    | 0.00040 | -1.44    | 0.00108 | -1.49    | 0.00024 | -1.41    | 0.00954 | -1.46    | 0.01437 |
| <i>CYP1B1</i>                                                   | 202437_s_at  | cytochrome P450, family 1, subfamily B, polypeptide 1                                                                                                                            | 1524                    | -1.38    | 0.00329 | -1.23    | 0.02353 | -1.6     | 0.00067 | -1.31    | 0.02331 | -1.56    | 0.00019 | -1.26    | 0.06591 | -1.51    | 0.00577 |
| <i>DDB2</i>                                                     | 203409_at    | damage-specific DNA binding protein 2, 48kDa                                                                                                                                     | 848                     | 1.82     | 0.00000 | 1.35     | 0.00000 | 1.54     | 0.00001 | 1.31     | 0.00000 | 1.3      | 0.00001 | 1.5      | 0.00011 | 1.44     | 0.00000 |
| <i>DDX24</i>                                                    | 200702_s_at  | DEAD (Asp-Glu-Ala-Asp) box polypeptide 24                                                                                                                                        | 593                     | 1.3      | 0.02330 | 1.53     | 0.00087 | 1.45     | 0.00004 | 1.27     | 0.02055 | 1.52     | 0.00519 | 1.36     | 0.06102 | 1.55     | 0.00436 |
| <i>DDX58</i>                                                    | 218943_s_at  | DEAD (Asp-Glu-Ala-Asp) box polypeptide 58                                                                                                                                        | 809                     | 2.83     | 0.00000 | 1.77     | 0.00000 | 2.62     | 0.00000 | 1.65     | 0.00001 | 1.79     | 0.00003 | 1.63     | 0.00002 | 1.71     | 0.00000 |
| <i>DGAT1</i>                                                    | 203669_s_at  | diacylglycerol O-acyltransferase homolog 1 (mouse)                                                                                                                               | 529                     | -1.11    | 0.17625 | -1.37    | 0.00108 | -1.53    | 0.00020 | -1.34    | 0.00394 | -1.36#   | 0.00121 | -1.3     | 0.05321 | -1.53    | 0.00073 |
| <i>DHX58</i>                                                    | 219364_at    | DEXH (Asp-Glu-X-His) box polypeptide 58                                                                                                                                          | 255                     | 2.97*    | 0.00000 | 2.17*    | 0.00000 | 2.75*    | 0.00000 | 2.35*    | 0.00001 | ND       | ND      | 2.45*    | 0.00000 | ND       | ND      |
| <i>DPEP2</i>                                                    | 219452_at    | dipeptidase 2                                                                                                                                                                    | 2087                    | -1.13    | 0.03831 | -1.27    | 0.00006 | -1.57    | 0.00000 | -1.53    | 0.00000 | -1.5     | 0.00000 | -1.43    | 0.00003 | -1.39    | 0.00002 |
| <i>DSC2</i>                                                     | 204751_x_at  | desmocollin 2                                                                                                                                                                    | 198                     | -1.29    | 0.01506 | -1.38    | 0.00079 | -1.3     | 0.00752 | -1.46    | 0.00006 | -1.4     | 0.00182 | -1.37#   | 0.00158 | -1.51    | 0.00002 |
| <i>ECGF1</i>                                                    | 217497_at    | endothelial cell growth factor 1 (platelet-derived)                                                                                                                              | 1083                    | 2.03     | 0.00000 | 1.67     | 0.00006 | 1.72     | 0.00002 | 1.54     | 0.00167 | 1.43     | 0.00232 | 1.41     | 0.00025 | 1.52     | 0.00058 |
| <i>ECGF1</i>                                                    | 204858_s_at  | endothelial cell growth factor 1 (platelet-derived)                                                                                                                              | 2627                    | 1.71     | 0.00000 | 1.24     | 0.00379 | 1.67     | 0.00002 | 1.32     | 0.01047 | 1.15     | 0.19014 | 1.29     | 0.04971 | 1.46     | 0.00076 |
| <i>EEF1B2</i> ///<br><i>hCG_19809</i> ///<br><i>hCG_1983058</i> | 200705_s_at  | eukaryotic translation elongation factor 1 beta 2 /// hCG1983058 /// eukaryotic translation elongation factor 1 beta 2-like                                                      | 27667                   | -1.67    | 0.00000 | -1.29    | 0.00000 | -1.51    | 0.00000 | -1.39    | 0.00000 | -1.24    | 0.00012 | -1.32    | 0.00000 | -1.39    | 0.00000 |
| <i>EEF1D</i>                                                    | 203113_s_at  | eukaryotic translation elongation factor 1 delta (guanine nucleotide exchange protein)                                                                                           | 12411                   | -1.5     | 0.00001 | -1.07    | 0.36102 | -1.58    | 0.00001 | -1.55    | 0.00170 | -1.9     | 0.00000 | -1.73    | 0.00005 | -2.16    | 0.00000 |

Supplementary table 1 (a)\_h\_1

| Gene Symbol             | Probe Set ID | Gene Title                                                                                                          | Day 1<br>mean<br>signal | Day 3<br>Fold Chg | p-value | Day 6<br>Fold Chg | p-value | Day 10<br>Fold Chg | p-value | Day 13<br>Fold Chg | p-value | Day 27<br>Fold Chg | p-value | Day 42<br>Fold Chg | p-value | Day 70<br>Fold Chg | p-value |
|-------------------------|--------------|---------------------------------------------------------------------------------------------------------------------|-------------------------|-------------------|---------|-------------------|---------|--------------------|---------|--------------------|---------|--------------------|---------|--------------------|---------|--------------------|---------|
| EEF2                    | 204102_s_at  | eukaryotic translation elongation factor 2                                                                          | 19263                   | -1.58             | 0.00000 | -1.31             | 0.00003 | -1.51              | 0.00000 | -1.36              | 0.00000 | -1.19              | 0.00145 | -1.31              | 0.00001 | -1.33              | 0.00001 |
| EEF2                    | 200094_s_at  | eukaryotic translation elongation factor 2                                                                          | 19261                   | -1.88             | 0.00000 | -1.52             | 0.00000 | -1.79              | 0.00000 | -1.41              | 0.00052 | -1.4               | 0.00001 | -1.57              | 0.00000 | -1.58              | 0.00000 |
| EHBP1L1 ///<br>MGC15523 | 91703_at     | hypothetical protein MGC15523 /// EH domain<br>binding protein 1-like 1                                             | 1364                    | -1.1              | 0.17847 | -1.07             | 0.33105 | -1.23              | 0.02427 | -1.41              | 0.00029 | -1.64              | 0.00000 | -1.51              | 0.00026 | -1.55              | 0.00000 |
| EIF2AK2                 | 204211_x_at  | eukaryotic translation initiation factor 2-alpha kinase 2                                                           | 901                     | 2.59              | 0.00000 | 1.89              | 0.00000 | 2.55               | 0.00000 | 2.2                | 0.00002 | 2.03               | 0.00002 | 1.99               | 0.00001 | 2.44               | 0.00000 |
| EIF3EIP                 | 217719_at    | eukaryotic translation initiation factor 3, subunit E interacting protein                                           | 16353                   | -2.02             | 0.00000 | -1.59             | 0.00000 | -2.02              | 0.00000 | -1.76              | 0.00000 | -1.6               | 0.00000 | -1.63              | 0.00000 | -1.74              | 0.00000 |
| EIF4B                   | 211938_at    | eukaryotic translation initiation factor 4B                                                                         | 8307                    | -1.88             | 0.00000 | -1.37             | 0.00026 | -1.77              | 0.00000 | -1.43              | 0.00001 | -1.43              | 0.00001 | -1.53              | 0.00000 | -1.55              | 0.00000 |
| EIF4B                   | 219599_at    | eukaryotic translation initiation factor 4B                                                                         | 1955                    | -1.58             | 0.00008 | -1.3              | 0.00293 | -1.42              | 0.00018 | -1.46              | 0.00074 | -1.25              | 0.02002 | -1.4               | 0.00245 | -1.7               | 0.00000 |
| EIF4B                   | 211937_at    | eukaryotic translation initiation factor 4B                                                                         | 7116                    | -1.97             | 0.00000 | -1.48             | 0.00000 | -1.96              | 0.00000 | -1.6               | 0.00009 | -1.54              | 0.00000 | -1.85              | 0.00000 | -1.82              | 0.00000 |
| EIF4EBP1                | 221539_at    | eukaryotic translation initiation factor 4E binding protein 1                                                       | 997                     | -1.21             | 0.02424 | -1.51             | 0.00022 | -1.33              | 0.00191 | -1.26              | 0.00361 | -1.29              | 0.00105 | -1.23              | 0.00859 | -1.22              | 0.01284 |
| EIF4H                   | 206621_s_at  | eukaryotic translation initiation factor 4H                                                                         | 7326                    | -1.15             | 0.04048 | -1.11             | 0.01691 | -1.16              | 0.01007 | -1.31              | 0.00199 | -1.37              | 0.00012 | -1.31              | 0.00075 | -1.54              | 0.00001 |
| EMR2                    | 207610_s_at  | egf-like module containing, mucin-like, hormone receptor-like 2                                                     | 1134                    | 1.1               | 0.10056 | -1.5              | 0.00002 | -1.14              | 0.01079 | -1.38              | 0.00179 | -1.24              | 0.02291 | -1.18              | 0.08326 | -1.23              | 0.01023 |
| EMR3                    | 210724_at    | egf-like module containing, mucin-like, hormone receptor-like 3                                                     | 369                     | -1.17             | 0.09383 | -1.65#            | 0.00303 | -1.95#             | 0.00001 | -2.42#             | 0.00009 | -1.98#             | 0.00002 | -2.51#             | 0.00000 | -1.90#             | 0.00031 |
| EPB41L3                 | 206710_s_at  | erythrocyte membrane protein band 4.1-like 3                                                                        | 753                     | 1.63              | 0.00014 | 1.05              | 0.43380 | 1.38               | 0.00065 | 1.15               | 0.27164 | 1.01               | 0.89993 | 1.1                | 0.42522 | 1.28               | 0.03095 |
| EPHB2                   | 209589_s_at  | EPH receptor B2                                                                                                     | 119                     | 3.25*             | 0.00000 | ND                |         | 3.46*              | 0.00000 | ND                 |         | ND                 |         | ND                 |         | ND                 |         |
| ERGIC3                  | 216032_s_at  | ERGIC and golgi 3                                                                                                   | 4084                    | -1.46             | 0.00000 | -1.36             | 0.00000 | -1.5               | 0.00000 | -1.34              | 0.00000 | -1.38              | 0.00000 | -1.36              | 0.00000 | -1.53              | 0.00000 |
| ETV7                    | 221680_s_at  | ets variant gene 7 (TEL2 oncogene)                                                                                  | 422                     | 1.55              | 0.00000 | 1.33              | 0.00026 | 1.55               | 0.00000 | 1.29               | 0.00300 | 1.27               | 0.00746 | 1.42               | 0.00024 | 1.28               | 0.00001 |
| EVIS                    | 209717_at    | ecotropic viral integration site 5                                                                                  | 303                     | -1.29#            | 0.00646 | -1.43#            | 0.00300 | -1.35#             | 0.00096 | -1.44#             | 0.00065 | -1.47#             | 0.00020 | -1.28#             | 0.00423 | -1.75#             | 0.00003 |
| FAM46A                  | 221766_s_at  | family with sequence similarity 46, member A                                                                        | 3034                    | 1.6               | 0.00000 | 1.21              | 0.00621 | 1.3                | 0.00335 | 1.09               | 0.17658 | 1.1                | 0.32120 | 1.12               | 0.10782 | 1.16               | 0.08447 |
| FAM70A                  | 219895_at    | family with sequence similarity 70, member A                                                                        | 78                      | 3.57*             | 0.00000 | 1.74*             | 0.00000 | 2.64*              | 0.00000 | 1.56*              | 0.01254 | ND                 |         | 1.78*              | 0.00126 | 1.67*              | 0.01016 |
| FANCL                   | 218397_at    | Fanconi anemia, complementation group L                                                                             | 264                     | 1.63              | 0.00001 | 1.39              | 0.00056 | 1.45               | 0.00108 | 1.25               | 0.02494 | 1.19               | 0.03011 | 1.32               | 0.00191 | 1.23               | 0.01400 |
| FBL                     | 211623_s_at  | fibrillarin                                                                                                         | 8706                    | -1.74             | 0.00000 | -1.37             | 0.00000 | -1.6               | 0.00000 | -1.37              | 0.00000 | -1.34              | 0.00000 | -1.34              | 0.00000 | -1.44              | 0.00000 |
| FCER1A                  | 211734_s_at  | Fc fragment of IgE, high affinity I, receptor for; alpha polypeptide                                                | 2024                    | -1.46             | 0.00277 | -1.69             | 0.00016 | -2.13              | 0.00000 | -2.19              | 0.00001 | -2.4               | 0.00000 | -3.01              | 0.00000 | -2.78              | 0.00000 |
| FCGR1A                  | 216950_s_at  | Fc fragment of IgG, high affinity Ia, receptor (CD64)                                                               | 1770                    | 1.54              | 0.00001 | 1.14              | 0.30537 | 1.5                | 0.00096 | 1.1                | 0.46389 | -1.09              | 0.23476 | 1.06               | 0.53759 | 1.07               | 0.35360 |
| FCGR1B                  | 214511_x_at  | Fc fragment of IgG, high affinity Ib, receptor (CD64)                                                               | 1704                    | 1.69              | 0.00000 | 1.11              | 0.48728 | 1.53               | 0.00190 | 1.2                | 0.21883 | 1.08               | 0.43579 | 1.24               | 0.10048 | 1.21               | 0.02724 |
| FCGR3A ///<br>FCGR3B    | 204006_s_at  | Fc fragment of IgG, low affinity IIIa, receptor (CD16a) /// Fc fragment of IgG, low affinity IIIb, receptor (CD16b) | 7216                    | 1.44              | 0.00013 | -1.32             | 0.00078 | 1.04               | 0.61541 | -1.34              | 0.00598 | -1.45              | 0.00096 | -1.46              | 0.00675 | -1.51              | 0.00056 |
| FCGR3B                  | 218831_s_at  | Fc fragment of IgG, receptor, transporter, alpha                                                                    | 3650                    | -1.2              | 0.01467 | -1.32             | 0.00115 | -1.38              | 0.00005 | -1.33              | 0.00013 | -1.63              | 0.00000 | -1.44              | 0.00028 | -1.45              | 0.00021 |
| FFAR2                   | 221345_at    | free fatty acid receptor 2                                                                                          | 546                     | 2.68              | 0.00004 | 1.29              | 0.23929 | 2.11               | 0.00106 | 1.24               | 0.49632 | 1.13               | 0.56929 | 1.06               | 0.80657 | 1.24               | 0.33917 |
| FGL1                    | 205305_at    | fibrinogen-like 1                                                                                                   | 285                     | -1.12             | 0.18950 | -1.04             | 0.62991 | -1.08              | 0.33694 | 1.16               | 0.19839 | 1.1                | 0.28414 | 1.5                | 0.00007 | 1.25               | 0.03465 |
| FKBP8                   | 40850_at     | FK506 binding protein 8, 38kDa                                                                                      | 444                     | ND                |         | ND                |         | ND                 |         | ND                 |         | ND                 |         | ND                 |         | 3.47*              | 0.00053 |
| FLJ11151                | 218610_s_at  | hypothetical protein FLJ11151                                                                                       | 733                     | -1.18             | 0.02682 | -1.32             | 0.03634 | -1.43              | 0.00050 | -1.44              | 0.00004 | -1.45              | 0.00031 | -1.55              | 0.00003 | -1.43              | 0.00006 |
| FLJ11286                | 218429_s_at  | hypothetical protein FLJ11286                                                                                       | 3098                    | 1.78              | 0.00000 | 1.53              | 0.00000 | 1.77               | 0.00000 | 1.61               | 0.00001 | 1.51               | 0.00000 | 1.58               | 0.00000 | 1.6                | 0.00000 |
| FLJ11286                | 53720_at     | hypothetical protein FLJ11286                                                                                       | 1603                    | 1.71              | 0.00000 | 1.49              | 0.00000 | 1.69               | 0.00000 | 1.44               | 0.00001 | 1.49               | 0.00000 | 1.49               | 0.00000 | 1.49               | 0.00000 |
| FLJ20035                | 218986_s_at  | hypothetical protein FLJ20035                                                                                       | 1446                    | 3.75              | 0.00000 | 2.96              | 0.00000 | 3.55               | 0.00000 | 2.67               | 0.00002 | 2.46               | 0.00000 | 2.61               | 0.00000 | 2.66               | 0.00000 |
| FOS                     | 209189_at    | v-fos FBJ murine osteosarcoma viral oncogene homolog                                                                | 18955                   | -1.4              | 0.00094 | -1.02             | 0.91257 | -1.49              | 0.00285 | -1.67              | 0.00837 | -1.53              | 0.00282 | -1.62              | 0.00085 | -1.52              | 0.00331 |
| FPRL1                   | 210773_s_at  | formyl peptide receptor-like 1                                                                                      | 736                     | 1.57              | 0.00034 | 1.11              | 0.28332 | 1.54               | 0.00032 | 1.11               | 0.19963 | 1.09               | 0.14171 | 1.05               | 0.65384 | -1.07              | 0.45145 |
| FZD2                    | 210220_at    | frizzled homolog 2 (Drosophila)                                                                                     | 332                     | 1.02              | 0.79654 | -1.22#            | 0.14621 | -1.05              | 0.72692 | -1.12              | 0.31604 | -1.52#             | 0.00037 | -1.12#             | 0.24087 | -1.64#             | 0.00288 |
| GAB2                    | 203853_s_at  | GRB2-associated binding protein 2                                                                                   | 1285                    | -1.08             | 0.35801 | -1.46#            | 0.00027 | -1.42#             | 0.00026 | -1.63#             | 0.00048 | -1.77#             | 0.00001 | -1.71#             | 0.00017 | -1.80#             | 0.00001 |
| GAS7                    | 202192_s_at  | growth arrest-specific 7                                                                                            | 2980                    | -1.55             | 0.00000 | -1.47             | 0.00000 | -1.62              | 0.00000 | -1.45              | 0.00000 | -1.43              | 0.00000 | -1.34              | 0.00002 | -1.4               | 0.00000 |
| GAS7                    | 202191_s_at  | growth arrest-specific 7                                                                                            | 1784                    | -1.48             | 0.00004 | -1.33             | 0.00030 | -1.51              | 0.00004 | -1.66              | 0.00002 | -1.47              | 0.00000 | -1.64              | 0.00004 | -1.43              | 0.00068 |
| GATA2                   | 209710_at    | GATA binding protein 2                                                                                              | 563                     | -1.12             | 0.13536 | -1.27             | 0.02946 | -1.19              | 0.17124 | -1.3               | 0.08284 | -1.89              | 0.00018 | -1.76              | 0.00296 | -1.74              | 0.00773 |
| GATM                    | 203178_at    | glycine amidinotransferase (L-arginine:glycine amidinotransferase)                                                  | 129                     | -1.61             | 0.00086 | -1.37             | 0.04764 | -1.44              | 0.00339 | -1.12              | 0.35500 | -1.26              | 0.04576 | -1.26              | 0.03167 | -1.65              | 0.00023 |
| GBP1                    | 202270_at    | guanylate binding protein 1, interferon-inducible, 67kDa                                                            | 929                     | 2.32              | 0.00000 | 1.33              | 0.00787 | 2.13               | 0.00000 | 1.37               | 0.00975 | 1.19               | 0.18167 | 1.34               | 0.01591 | 1.26               | 0.05329 |
| GBP1                    | 202269_x_at  | guanylate binding protein 1, interferon-inducible, 67kDa                                                            | 2762                    | 1.8               | 0.00000 | 1.17              | 0.00425 | 1.73               | 0.00000 | 1.26               | 0.00026 | 1.21               | 0.03786 | 1.11               | 0.23141 | 1.23               | 0.01037 |
| GCA                     | 203765_at    | grancalcin, EF-hand calcium binding protein                                                                         | 2367                    | -1.12             | 0.18707 | -1.27             | 0.02101 | -1.3               | 0.00766 | -1.34              | 0.00095 | -1.56              | 0.00000 | -1.32              | 0.00263 | -1.59              | 0.00002 |
| GIMAP4                  | 219243_at    | GTPase, IMAP family member 4                                                                                        | 6893                    | 1.53              | 0.00040 | 1.04              | 0.79506 | 1.29               | 0.06113 | 1.43               | 0.00331 | 1.03               | 0.73730 | 1.12               | 0.34266 | -1.04              | 0.80989 |
| GIT1                    | 218030_at    | G protein-coupled receptor kinase interactor 1                                                                      | 940                     | 1.04              | 0.70275 | 1.11              | 0.32720 | 1.3                | 0.00428 | 1.53               | 0.07368 | 1.64               | 0.00063 | 1.67               | 0.00498 | 1.96               | 0.00042 |
| GLS                     | 203159_at    | glutaminase                                                                                                         | 2115                    | -1.51             | 0.00000 | -1.19             | 0.03761 | -1.41              | 0.00022 | 1.02               | 0.83490 | -1.09              | 0.15077 | -1.11              | 0.15643 | -1.28              | 0.00901 |
| GLUL                    | 200648_s_at  | glutamate-ammonia ligase (glutamine synthetase)                                                                     | 1147                    | 1.56              | 0.00005 | -1.02             | 0.91021 | 1.35               | 0.05554 | 1.19               | 0.35193 | 1.25               | 0.16702 | 1.2                | 0.23483 | 1.8                | 0.05642 |
| GMPPR                   | 204187_at    | guanosine monophosphate reductase                                                                                   | 480                     | 1.86*             | 0.00000 | 1.27*             | 0.04478 | 2.14*              | 0.00000 | 2.36*              | 0.05103 | 2.43*              | 0.00161 | 2.76*              | 0.03489 | 4.48*              | 0.00448 |
| GNG11                   | 204115_at    | guanine nucleotide binding protein (G protein), gamma 11                                                            | 1677                    | 1.37              | 0.03951 | -1.31             | 0.01728 | 1.35               | 0.06739 | -1.56              | 0.00081 | -1.32              | 0.01298 | -1.2               | 0.15963 | 1.06               | 0.63679 |
| GPR109B                 | 205220_at    | G protein-coupled receptor 109B                                                                                     | 1859                    | 1.27              | 0.31025 | 1.23              | 0.49550 | -1.03              | 0.90008 | -1                 | 0.99470 | -1.37              | 0.13537 | -2.73              | 0.00030 | -1.79              | 0.02396 |
| GPR18                   | 210279_at    | G protein-coupled receptor 18                                                                                       | 1618                    | 1.33              | 0.00333 | 1.45              | 0.00541 | 1.36               | 0.01453 | 1.5                | 0.00082 | 1.43               | 0.00285 | 1.15               | 0.10211 | 1.05               | 0.59431 |

Supplementary table 1 (a)\_h\_j1

|                |              |                                                                                                                                       | Day 1       | Day 3    |         | Day 6    |         | Day 10   |         | Day 13   |         | Day 27   |         | Day 42   |         | Day 70   |         |
|----------------|--------------|---------------------------------------------------------------------------------------------------------------------------------------|-------------|----------|---------|----------|---------|----------|---------|----------|---------|----------|---------|----------|---------|----------|---------|
| Gene Symbol    | Probe Set ID | Gene Title                                                                                                                            | mean signal | Fold Chg | p-value |
| GRN            | 216041_x_at  | granulin                                                                                                                              | 10638       | 1.5      | 0.00000 | 1.06     | 0.23158 | 1.3      | 0.00094 | 1.2      | 0.05348 | 1        | 0.99417 | 1.13     | 0.28612 | 1.15     | 0.13857 |
| GSP71          | 215438_x_at  | G1 to S phase transition 1                                                                                                            | 1400        | -1.13    | 0.12739 | -1.05    | 0.37751 | 1.18     | 0.08714 | 1.65     | 0.09908 | 1.92     | 0.00063 | 2.18     | 0.01772 | 2.63     | 0.01075 |
| GYP A          | 211820_x_at  | glycophorin A (MNS blood group)                                                                                                       | 93          | ND       |         | 6.86*    | 0.00046 |
| GYP A          | 211821_x_at  | glycophorin A (MNS blood group)                                                                                                       | 54          | ND       |         | ND       |         | ND       |         | ND       |         | 14.69*   | 0.00141 | ND       |         | 17.33*   | 0.00020 |
| GYP B          | 214407_x_at  | glycophorin B (MNS blood group)                                                                                                       | 244         | ND       |         | ND       |         | ND       |         | ND       |         | 6.04*    | 0.00355 | 6.47*    | 0.00856 | 7.52*    | 0.00022 |
| GYP B          | 207459_x_at  | glycophorin B (MNS blood group)                                                                                                       | 299         | ND       |         | 5.02*    | 0.00003 |
| GYP B /// GYPE | 216833_x_at  | glycophorin B (MNS blood group) /// glycophorin E<br>granzyme B (granzyme 2, cytotoxic T-lymphocyte-associated serine esterase 1)     | 235         | ND       |         | ND       |         | ND       |         | ND       |         | 3.15*    | 0.01193 | 3.29*    | 0.00824 | 3.67*    | 0.00013 |
| GZMB           | 210164_at    | H1 histone family, member 0                                                                                                           | 6882        | 1.61     | 0.00000 | 1.28     | 0.00004 | 1.48     | 0.00110 | 1.53     | 0.00056 | 1.33     | 0.00117 | 1.37     | 0.00220 | 1.51     | 0.00010 |
| H1F0           | 208886_at    | H2B histone family, member S                                                                                                          | 651         | 3.13     | 0.00001 | 1.62     | 0.00000 | 2.14     | 0.00000 | 1.78     | 0.00010 | 1.89     | 0.00001 | 2.11     | 0.00003 | 2.54     | 0.00001 |
| H2BFS          | 208579_x_at  | H3 histone, family 3B (H3.3B)                                                                                                         | 1578        | 1.94     | 0.00003 | 1.4      | 0.00813 | 1.93     | 0.00018 | 1.19     | 0.21376 | 1.26     | 0.09250 | 1.13     | 0.33230 | 1.73     | 0.00106 |
| H3F3B          | 211998_at    | hydroxyacyl-Coenzyme A dehydrogenase/3-ketoacyl-Coenzyme A thiolase/enoyl-Coenzyme A hydratase (trifunctional protein), alpha subunit | 5179        | 1.1      | 0.29117 | 1.01     | 0.90243 | 1.07     | 0.56375 | -1.17    | 0.15029 | 1.28     | 0.00093 | 1.24     | 0.01746 | 1.66     | 0.00005 |
| HADHA          | 208631_s_at  | hemoglobin, alpha 1 /// hemoglobin, alpha 2                                                                                           | 3917        | -1.51    | 0.00000 | -1.49    | 0.00001 | -1.62    | 0.00000 | -1.43    | 0.00002 | -1.55    | 0.00000 | -1.54    | 0.00000 | -1.69    | 0.00000 |
| HBA1 /// HBA2  | 211699_x_at  | hemoglobin, delta                                                                                                                     | 57541       | 1.09     | 0.38622 | -1.09    | 0.39088 | 1.19     | 0.10586 | 1.26     | 0.06477 | 1.49     | 0.00009 | 1.33     | 0.00472 | 1.52     | 0.00001 |
| HBD            | 206834_at    | hemoglobin, gamma A /// hemoglobin, gamma G                                                                                           | 2510        | -1.12    | 0.65336 | -1       | 0.98347 | 2.78     | 0.00888 | 4.78     | 0.02411 | 7.61     | 0.00015 | 6.98     | 0.00251 | 9.39     | 0.00001 |
| HBG1 /// HBG2  | 213515_x_at  | hemoglobin, gamma A /// hemoglobin, gamma G                                                                                           | 6275        | -1.19    | 0.44359 | -1.19    | 0.37492 | 1.62     | 0.02309 | 2.45     | 0.08160 | 4.67     | 0.00014 | 4.72     | 0.00088 | 6.53     | 0.00000 |
| HBG1 /// HBG2  | 204848_x_at  | hemoglobin, gamma A /// hemoglobin, gamma G                                                                                           | 6641        | -1.2     | 0.51621 | -1.28    | 0.41289 | 1.76     | 0.02209 | 2.47     | 0.09180 | 4.9      | 0.00001 | 4.64     | 0.00093 | 6.45     | 0.00000 |
| HBG2           | 204419_x_at  | hemoglobin, gamma G                                                                                                                   | 7115        | -1.21    | 0.48469 | -1.26    | 0.44314 | 1.79     | 0.01860 | 2.49     | 0.08914 | 5.04     | 0.00002 | 5.02     | 0.00079 | 6.75     | 0.00000 |
| hCG 1776259    | 206548_at    | hypothetical protein FLJ23556                                                                                                         | 166         | 1.91*    | 0.00050 | ND       |         |
| HEMK1          | 218621_at    | HemK methyltransferase family member 1                                                                                                | 382         | 1.10*    | 0.30026 | 1.23*    | 0.02160 | 1.27*    | 0.01584 | 1.22*    | 0.10372 | 1.53*    | 0.00006 | 1.54*    | 0.00184 | 1.51*    | 0.00019 |
| HERC5          | 219863_at    | hect domain and RLD 5                                                                                                                 | 1046        | 4.54     | 0.00000 | 2.14     | 0.00000 | 4.07     | 0.00000 | 2.46     | 0.00000 | 2.55     | 0.00000 | 2.52     | 0.00000 | 2.72     | 0.00000 |
| HERC6          | 219352_at    | hect domain and RLD 6                                                                                                                 | 651         | 5.88     | 0.00000 | 4.09     | 0.00000 | 5.74     | 0.00000 | 4.07     | 0.00000 | 4.07     | 0.00000 | 4.22     | 0.00000 | 4.23     | 0.00000 |
| HESX1          | 211267_at    | HESX homeobox 1                                                                                                                       | 34          | 11.52*   | 0.00000 | ND       |         | 10.31*   | 0.00000 | ND       |         | ND       |         | ND       |         | ND       |         |
| HIST1H1C       | 209398_at    | histone cluster 1, H1c                                                                                                                | 712         | 2.56     | 0.00000 | 1.63     | 0.00014 | 2.4      | 0.00000 | 1.73     | 0.00000 | 2.63     | 0.00047 | 2.39     | 0.00035 | 3.18     | 0.00000 |
| HIST1H2AC      | 215071_s_at  | histone cluster 1, H2ac                                                                                                               | 3816        | 1.51     | 0.00142 | 1.08     | 0.28337 | 1.6      | 0.00091 | 1.01     | 0.92044 | 1.13     | 0.20578 | 1.19     | 0.14911 | 1.71     | 0.00081 |
| HIST1H2AE      | 214469_at    | histone cluster 1, H2ae                                                                                                               | 153         | 2.40*    | 0.00002 | 1.95*    | 0.00002 | 3.30*    | 0.00001 | 2.12*    | 0.00023 | 2.53*    | 0.00006 | 2.60*    | 0.00003 | 3.84*    | 0.00000 |
| HIST1H2AG      | 207156_at    | histone cluster 1, H2ag                                                                                                               | 203         | ND       |         | ND       |         | 1.84*    | 0.00161 | ND       |         | ND       |         | 1.26*    | 0.10246 | 1.84*    | 0.00003 |
| HIST1H2AJ      | 208583_x_at  | histone cluster 1, H2aj                                                                                                               | 577         | 1.77*    | 0.00004 | ND       |         |
| HIST1H2BC ///  |              |                                                                                                                                       |             |          |         |          |         |          |         |          |         |          |         |          |         |          |         |
| HIST1H2BG      | 214455_at    | histone cluster 1, H2bg /// histone cluster 1, H2bc                                                                                   | 132         | 2.52*    | 0.00011 | 1.96*    | 0.00091 | 2.73*    | 0.00000 | 1.91*    | 0.00013 | 2.03*    | 0.00003 | 2.16*    | 0.00229 | 2.82*    | 0.00000 |
| HIST1H2BD      | 222067_x_at  | histone cluster 1, H2bd                                                                                                               | 1191        | 3.37     | 0.00000 | 2.51     | 0.00001 | 3.42     | 0.00000 | 2.04     | 0.00108 | 2.42     | 0.00003 | 2.02     | 0.00349 | 3.28     | 0.00000 |
| HIST1H2BD      | 209911_x_at  | histone cluster 1, H2bd                                                                                                               | 1283        | 2.14     | 0.00000 | 1.72     | 0.00001 | 2.26     | 0.00001 | 1.58     | 0.00007 | 1.69     | 0.00000 | 1.61     | 0.00041 | 2.2      | 0.00000 |
| HIST1H2BE      | 208527_x_at  | histone cluster 1, H2be                                                                                                               | 711         | 1.9      | 0.00002 | 1.54     | 0.00020 | 2.04     | 0.00002 | 1.41     | 0.00674 | 1.56     | 0.00104 | 1.4      | 0.00624 | 2        | 0.00000 |
| HIST1H2BF      | 208490_x_at  | histone cluster 1, H2bf                                                                                                               | 731         | 2.4      | 0.00001 | 1.92     | 0.00001 | 2.54     | 0.00001 | 1.75     | 0.00025 | 1.91     | 0.00003 | 1.5      | 0.01006 | 2.19     | 0.00000 |
| HIST1H2BG      | 210387_at    | histone cluster 1, H2bg                                                                                                               | 165         | 4.25*    | 0.00002 | 2.76*    | 0.00012 | 3.62*    | 0.00010 | 3.47*    | 0.00002 | 3.29*    | 0.00000 | 2.43*    | 0.00534 | 3.37*    | 0.00000 |
| HIST1H2BG      | 215779_s_at  | histone cluster 1, H2bg                                                                                                               | 231         | 3.13*    | 0.00000 | 2.23*    | 0.00001 | 2.65*    | 0.00002 | 1.96*    | 0.00000 | 2.18*    | 0.00000 | ND       |         | 2.19*    | 0.00001 |
| HIST1H2BH      | 208546_x_at  | histone cluster 1, H2bh                                                                                                               | 361         | 2.10*    | 0.00016 | 1.58*    | 0.00266 | 2.50*    | 0.00001 | 1.43*    | 0.07162 | 1.70*    | 0.00590 | 1.38*    | 0.09242 | 2.45*    | 0.00026 |
| HIST1H2BI      | 208523_x_at  | histone cluster 1, H2bi                                                                                                               | 345         | 2.35     | 0.00001 | 1.93     | 0.00003 | 2.52     | 0.00004 | 1.86     | 0.00050 | 1.95     | 0.00002 | 1.47     | 0.02142 | 2.19     | 0.00002 |
| HIST1H3D       | 214472_at    | histone cluster 1, H3d                                                                                                                | 116         | 3.11*    | 0.00000 | 2.76*    | 0.00000 | 3.53*    | 0.00000 | ND       |         | ND       |         | ND       |         | ND       |         |
| HIST1H3H       | 206110_at    | histone cluster 1, H3h                                                                                                                | 1317        | 1.54     | 0.00224 | 1.47     | 0.00406 | 1.95     | 0.00021 | 1.39     | 0.02999 | 1.79     | 0.00009 | 1.93     | 0.00045 | 2.82     | 0.00000 |
| HIST1H4H       | 208180_s_at  | histone cluster 1, H4h                                                                                                                | 190         | 1.63     | 0.00126 | 1.85     | 0.00255 | 3.12     | 0.00004 | 2.18     | 0.00084 | 3.04     | 0.00111 | 2.42     | 0.00001 | 4.65     | 0.00013 |
| HIST2H2AA3 /// |              |                                                                                                                                       |             |          |         |          |         |          |         |          |         |          |         |          |         |          |         |
| HIST2H2AA4     | 214290_s_at  | histone cluster 2, H2aa3 /// histone cluster 2, H2aa4                                                                                 | 7248        | 3.14     | 0.00000 | 1.76     | 0.00004 | 2.83     | 0.00000 | 1.79     | 0.00059 | 2.09     | 0.00000 | 2.08     | 0.00006 | 2.76     | 0.00000 |
| HIST2H2AA3 /// |              |                                                                                                                                       |             |          |         |          |         |          |         |          |         |          |         |          |         |          |         |
| HIST2H2AA4     | 218280_x_at  | histone cluster 2, H2aa3 /// histone cluster 2, H2aa4                                                                                 | 2660        | 2.89     | 0.00000 | 1.56     | 0.00089 | 2.55     | 0.00001 | 1.5      | 0.01173 | 1.86     | 0.00002 | 1.87     | 0.00013 | 2.45     | 0.00000 |
| HIST2H2BE      | 202708_s_at  | histone cluster 2, H2be                                                                                                               | 1609        | 2.62     | 0.00000 | 1.63     | 0.00008 | 2.47     | 0.00000 | 1.47     | 0.00770 | 1.75     | 0.00019 | 1.68     | 0.00141 | 2.28     | 0.00000 |
| HIST3H2A       | 221582_at    | histone cluster 3, H2a                                                                                                                | 953         | 1.11     | 0.22967 | 1.12     | 0.24862 | 1.21     | 0.05131 | 1.33     | 0.00969 | 1.44     | 0.00050 | 1.53     | 0.00000 | 1.29     | 0.00226 |
| HK3            | 205936_s_at  | hexokinase 3 (white cell)                                                                                                             | 2708        | -1.08    | 0.19525 | -1.45    | 0.00039 | -1.28    | 0.03063 | -1.37    | 0.00345 | -1.64    | 0.00007 | -1.32    | 0.02022 | -1.45    | 0.00026 |
| HLA-DMB        | 203932_at    | major histocompatibility complex, class II, DM beta                                                                                   | 9491        | -1.23    | 0.04403 | -1.34    | 0.02458 | -1.49    | 0.00797 | -1.4     | 0.01691 | -1.88    | 0.00006 | -1.87    | 0.00001 | -2.01    | 0.00000 |
| HLA-DQB1       | 209823_x_at  | major histocompatibility complex, class II, DQ beta 1                                                                                 | 5133        | -1.45    | 0.00005 | -1.4     | 0.00142 | -1.59    | 0.00005 | -1.26    | 0.03170 | -1.42    | 0.00018 | -1.41    | 0.00372 | -1.48    | 0.00756 |
| HMBS           | 203040_s_at  | hydroxymethylbilane synthase                                                                                                          | 939         | -1.05    | 0.26165 | -1.05    | 0.30238 | -1.01    | 0.79700 | 1.26     | 0.06478 | 1.4      | 0.00116 | 1.47     | 0.00136 | 1.5      | 0.00020 |
| HNRPNA1 ///    |              |                                                                                                                                       |             |          |         |          |         |          |         |          |         |          |         |          |         |          |         |
| LOC728844      | 222040_at    | hypothetical protein LOC728844                                                                                                        | 1693        | -1.07    | 0.51167 | 1.2      | 0.17571 | 1.09     | 0.52122 | -1.04    | 0.80102 | 1.3      | 0.03336 | 1.19     | 0.06884 | 1.62     | 0.00099 |
| HPSE           | 219403_s_at  | heparanase                                                                                                                            | 1257        | 1.7      | 0.00000 | 1.2      | 0.00428 | 1.57     | 0.00000 | 1.29     | 0.01857 | 1.21     | 0.03036 | 1.32     | 0.02143 | 1.55     | 0.00005 |
| HRASLS         | 219983_at    | HRAS-like suppressor                                                                                                                  | 172         | -1.33#   | 0.00621 | -1.48#   | 0.00168 | -1.28#   | 0.00793 | -1.52#   | 0.00053 | -1.22#   | 0.02570 | -1.20#   | 0.04041 | -1.23#   | 0.07581 |
| ICAM3          | 204949_at    | intercellular adhesion molecule 3                                                                                                     | 5713        | -1.28    | 0.00000 | -1.32    | 0.00031 | -1.43    | 0.00000 | -1.41    | 0.00007 | -1.56    | 0.00002 | -1.37    | 0.00026 | -1.56    | 0.00024 |
| IFI16          | 206332_s_at  | interferon, gamma-inducible protein 16                                                                                                | 4915        | 1.78     | 0.00000 | 1.51     | 0.00006 | 1.74     | 0.00000 | 1.47     | 0.00007 | 1.44     | 0.00006 | 1.52     | 0.00000 | 1.48     | 0.00001 |
| IFI16          | 208966_x_at  | interferon, gamma-inducible protein 16                                                                                                | 7072        | 1.76     | 0.00000 | 1.45     | 0.00001 | 1.68     | 0.00000 | 1.51     | 0.00008 | 1.45     | 0.00044 | 1.57     | 0.00001 | 1.4      | 0.00008 |
| IFI16          | 208965_s_at  | interferon, gamma-inducible protein 16                                                                                                | 2462        | 1.74     | 0.00000 | 1.45     | 0.00001 | 1.76     | 0.00000 | 1.37     | 0.00758 | 1.34     | 0.01364 | 1.22     | 0.01812 | 1.28     | 0.00340 |
| IFI27          | 202411_at    | interferon, alpha-inducible protein 27                                                                                                | 322         | 73.30*   | 0.00000 | 70.29*   | 0.00000 | 98.01*   | 0.00000 | 93.53*   | 0.00000 | 94.83*   | 0.00000 | 97.44*   | 0.00000 | 107.70*  | 0.00000 |
| IFI35          | 209417_s_at  | interferon-induced protein 35                                                                                                         | 1906        | 3.19     | 0.00000 | 2.03     | 0.00000 | 2.86     | 0.00000 | 2.02     | 0.00000 | 1.76     | 0.00011 | 1.88     | 0.00013 | 1.88     | 0.00000 |
| IFI44          | 214453_s_at  | interferon-induced protein 44                                                                                                         | 2711        | 5.97     | 0.00000 | 4.61     | 0.00000 | 6        | 0.00000 | 4.65     | 0.00000 | 4.91     | 0.00000 | 5.2      | 0.00000 | 5.45     | 0.00000 |
| IFI44          | 214059_at    | interferon-induced protein 44                                                                                                         | 523         | 7.09     | 0.00000 | 4.75     | 0.00000 | 6.45     | 0.00000 | 4.78     | 0.00000 | 4.53     | 0.00000 | 5.15     | 0.00000 | 4.98     | 0.00000 |

Supplementary table 1 (a)\_h\_j1

| Gene Symbol                                              | Probe Set ID | Gene Title                                                                                                                                         | mean<br>signal | Day 1    |         | Day 3    |         | Day 6    |         | Day 10   |         | Day 13   |         | Day 27   |         | Day 42   |         | Day 70   |         |
|----------------------------------------------------------|--------------|----------------------------------------------------------------------------------------------------------------------------------------------------|----------------|----------|---------|----------|---------|----------|---------|----------|---------|----------|---------|----------|---------|----------|---------|----------|---------|
|                                                          |              |                                                                                                                                                    |                | Fold Chg | p-value |
| IF44L                                                    | 204439_at    | interferon-induced protein 44-like                                                                                                                 | 1836           | 10.07    | 0.00000 | 8.17     | 0.00000 | 9.68     | 0.00000 | 7.58     | 0.00000 | 7.5      | 0.00000 | 7.99     | 0.00000 | 8.38     | 0.00000 | 8.38     | 0.00000 |
| IFIH1                                                    | 219209_at    | interferon induced with helicase C domain 1                                                                                                        | 616            | 3.31     | 0.00000 | 2.01     | 0.00000 | 3.26     | 0.00000 | 2.37     | 0.00000 | 2.12     | 0.00000 | 2.29     | 0.00000 | 2.15     | 0.00000 | 2.15     | 0.00000 |
| IFIT1                                                    | 203153_at    | interferon-induced protein with tetratricopeptide repeats 1                                                                                        | 828            | 12.23*   | 0.00000 | 4.06*    | 0.00000 | 9.91*    | 0.00000 | 6.00*    | 0.00000 | 4.76*    | 0.00000 | 5.59*    | 0.00000 | 4.81*    | 0.00006 | 4.81*    | 0.00006 |
| IFIT2                                                    | 217502_at    | interferon-induced protein with tetratricopeptide repeats 2                                                                                        | 929            | 4.16*    | 0.00001 | ND       |         | 3.73*    | 0.00018 | 1.71*    | 0.00064 | ND       |         | ND       |         | 1.40*    | 0.02177 | 1.40*    | 0.02177 |
| IFIT3                                                    | 204747_at    | interferon-induced protein with tetratricopeptide repeats 3                                                                                        | 1316           | 7.11     | 0.00000 | 3.3      | 0.00000 | 6.76     | 0.00000 | 3.79     | 0.00000 | 3.43     | 0.00001 | 3.54     | 0.00001 | 3.85     | 0.00000 | 3.85     | 0.00000 |
| IFIT5                                                    | 203596_s_at  | interferon-induced protein with tetratricopeptide repeats 5                                                                                        | 677            | 2.74*    | 0.00000 | 1.86*    | 0.00015 | 2.72*    | 0.00000 | 2.36*    | 0.00000 | 2.03*    | 0.00001 | 2.24*    | 0.00000 | 1.80*    | 0.00028 | 1.80*    | 0.00028 |
| IFIT5                                                    | 203595_s_at  | interferon-induced protein with tetratricopeptide repeats 5                                                                                        | 965            | 2.25     | 0.00000 | 1.41     | 0.00015 | 1.99     | 0.00001 | 1.56     | 0.00002 | 1.45     | 0.00054 | 1.52     | 0.00001 | 1.3      | 0.02059 | 1.3      | 0.02059 |
| IFITM1                                                   | 201601_x_at  | interferon induced transmembrane protein 1 (9-27)                                                                                                  | 18622          | 2.01     | 0.00000 | 1.63     | 0.00000 | 1.89     | 0.00000 | 1.67     | 0.00000 | 1.67     | 0.00000 | 1.74     | 0.00000 | 1.74     | 0.00000 | 1.74     | 0.00000 |
| IFITM1                                                   | 214022_s_at  | interferon induced transmembrane protein 1 (9-27)                                                                                                  | 22532          | 1.71     | 0.00000 | 1.47     | 0.00000 | 1.68     | 0.00000 | 1.54     | 0.00000 | 1.54     | 0.00000 | 1.55     | 0.00000 | 1.58     | 0.00000 | 1.58     | 0.00000 |
| IFITM2                                                   | 201315_x_at  | interferon induced transmembrane protein 2 (1-8D)                                                                                                  | 22495          | 1.7      | 0.00000 | 1.47     | 0.00000 | 1.64     | 0.00000 | 1.55     | 0.00000 | 1.36     | 0.00001 | 1.43     | 0.00000 | 1.5      | 0.00000 | 1.5      | 0.00000 |
| IFITM3                                                   | 212203_x_at  | interferon induced transmembrane protein 3 (1-8U)                                                                                                  | 15734          | 2.15     | 0.00000 | 1.77     | 0.00000 | 2.07     | 0.00000 | 1.75     | 0.00000 | 1.67     | 0.00000 | 1.78     | 0.00000 | 1.97     | 0.00000 | 1.97     | 0.00000 |
| IFT81                                                    | 219372_at    | intraflagellar transport 81 homolog (Chlamydomonas)                                                                                                | 86             | -1.51#   | 0.00063 | -1.11#   | 0.28166 | -1.18#   | 0.26463 | -1.28#   | 0.03452 | 1.08#    | 0.62846 | -1.09#   | 0.46919 | -1.32#   | 0.02870 | -1.32#   | 0.02870 |
| IGF2BP3                                                  | 203820_s_at  | insulin-like growth factor 2 mRNA binding protein 3                                                                                                | 176            | 1.67     | 0.00002 | 1.17     | 0.02011 | 1.66     | 0.00009 | 1.12     | 0.16337 | -1.05    | 0.61512 | 1.03     | 0.82312 | 1.14     | 0.19708 | 1.14     | 0.19708 |
| IGHA1                                                    | 215118_s_at  | immunoglobulin heavy constant alpha 1                                                                                                              | 1117           | -1.84    | 0.00000 | -1.47    | 0.00016 | -1.97    | 0.00000 | -1.34    | 0.02670 | -1.5     | 0.00002 | -1.47    | 0.06343 | -2.01    | 0.00270 | -2.01    | 0.00270 |
| IGHD                                                     | 214973_x_at  | immunoglobulin heavy constant delta                                                                                                                | 886            | -1.3     | 0.00482 | -1.08    | 0.40400 | -1.5     | 0.00014 | -1.14    | 0.22305 | -1.29    | 0.01542 | -1.35    | 0.00568 | -1.56#   | 0.00112 | -1.56#   | 0.00112 |
| IGHG1 ///<br>IGHG2 ///<br>IGHG3 /// IGHM<br>/// IGHV4-31 | 211430_s_at  | immunoglobulin heavy constant gamma 1 (G1m marker) /// gamma 2 (G2m marker) /// gamma 3 (G3m marker) /// mu /// immunoglobulin heavy variable 4-31 | 6712           | -1.39    | 0.00672 | -1.09    | 0.55640 | -2.17    | 0.00047 | -1.64    | 0.02145 | -2.3     | 0.00077 | -1.83    | 0.02203 | -3.17    | 0.00027 | -3.17    | 0.00027 |
| IGHV1-69                                                 | 211635_x_at  | Immunoglobulin heavy variable 1-69                                                                                                                 | 944            | -1.44    | 0.00149 | -1.11    | 0.31515 | -1.47    | 0.00335 | -1.34    | 0.05517 | -1.24    | 0.07239 | -1.62    | 0.00035 | -1.59    | 0.00875 | -1.59    | 0.00875 |
| IL13RA1                                                  | 201887_at    | interleukin 13 receptor, alpha 1                                                                                                                   | 1657           | -1.53    | 0.00005 | -1.4     | 0.00009 | -1.57    | 0.00002 | -1.44    | 0.00019 | -1.46    | 0.00001 | -1.4     | 0.00009 | -1.47    | 0.00004 | -1.47    | 0.00004 |
| IL1RN                                                    | 212659_s_at  | interleukin 1 receptor antagonist                                                                                                                  | 700            | 1.51     | 0.00000 | 1.12     | 0.01432 | 1.39     | 0.00002 | 1.12     | 0.16678 | ND       |         | ND       |         | ND       |         | ND       |         |
| IL1RN                                                    | 216243_s_at  | interleukin 1 receptor antagonist                                                                                                                  | 982            | 1.56     | 0.00000 | 1.11     | 0.17858 | 1.51     | 0.00005 | 1.27     | 0.00595 | 1.12#    | 0.21890 | 1.13     | 0.34278 | 1.3      | 0.02978 | 1.3      | 0.02978 |
| IL1RN                                                    | 212657_s_at  | interleukin 1 receptor antagonist                                                                                                                  | 1454           | 2.12     | 0.00001 | 1.14     | 0.11428 | 1.56     | 0.00018 | 1.36     | 0.11997 | 1.19     | 0.20644 | 1.18     | 0.10854 | 1.26     | 0.01422 | 1.26     | 0.01422 |
| IL8                                                      | 217281_x_at  | Interleukin 8                                                                                                                                      | 412            | -1.48#   | 0.00728 | -1.17#   | 0.22690 | -1.95#   | 0.00068 | -1.36#   | 0.16970 | -1.30#   | 0.09618 | -1.92#   | 0.00302 | -1.79#   | 0.01762 | -1.79#   | 0.01762 |
| INSR                                                     | 213792_s_at  | insulin receptor                                                                                                                                   | 364            | -1.48    | 0.00320 | -1.56#   | 0.00091 | -1.61#   | 0.00016 | -1.94    | 0.00002 | -1.96#   | 0.00002 | -1.97#   | 0.00000 | -1.60#   | 0.00049 | -1.60#   | 0.00049 |
| IRF1                                                     | 202531_at    | interferon regulatory factor 1                                                                                                                     | 4893           | -1.13    | 0.11828 | -1.36    | 0.00079 | -1.24    | 0.00128 | -1.33    | 0.00200 | -1.62    | 0.00001 | -1.6     | 0.00003 | -1.59    | 0.00000 | -1.59    | 0.00000 |
| IRF7                                                     | 208436_s_at  | interferon regulatory factor 7                                                                                                                     | 3052           | 3.65     | 0.00000 | 2.44     | 0.00000 | 3.34     | 0.00000 | 2.48     | 0.00000 | 2.22     | 0.00000 | 2.49     | 0.00000 | 2.38     | 0.00000 | 2.38     | 0.00000 |
| IRS2                                                     | 209185_s_at  | insulin receptor substrate 2                                                                                                                       | 7235           | -1.69    | 0.00319 | -1.36    | 0.04881 | -1.57    | 0.00380 | -1.74    | 0.00001 | -1.4     | 0.00297 | -1.53    | 0.00113 | -1.32    | 0.05489 | -1.32    | 0.05489 |
| IRS2                                                     | 209184_s_at  | insulin receptor substrate 2                                                                                                                       | 3142           | -1.54    | 0.00254 | -1.22    | 0.12321 | -1.38    | 0.01327 | -1.5     | 0.00000 | -1.21    | 0.02529 | -1.41    | 0.00154 | -1.35    | 0.02744 | -1.35    | 0.02744 |
| ISG15                                                    | 205483_s_at  | ISG15 ubiquitin-like modifier                                                                                                                      | 4167           | 6.76     | 0.00000 | 3.76     | 0.00000 | 6.59     | 0.00000 | 4        | 0.00000 | 3.9      | 0.00000 | 4.36     | 0.00000 | 4.23     | 0.00000 | 4.23     | 0.00000 |
| ISG20                                                    | 204698_at    | interferon stimulated exonuclease gene 20kDa                                                                                                       | 2731           | 2.54     | 0.00000 | 1.82     | 0.00000 | 2.64     | 0.00000 | 1.77     | 0.00000 | 1.71     | 0.00002 | 1.64     | 0.00002 | 1.68     | 0.00000 | 1.68     | 0.00000 |
| ISG20                                                    | 33304_at     | interferon stimulated exonuclease gene 20kDa                                                                                                       | 5053           | 1.79     | 0.00000 | 1.49     | 0.00000 | 1.86     | 0.00000 | 1.51     | 0.00000 | 1.47     | 0.00000 | 1.44     | 0.00000 | 1.44     | 0.00000 | 1.44     | 0.00000 |
| ITGA2B                                                   | 206493_at    | integrin, alpha 2b (platelet glycoprotein IIb of IIb/IIIa complex, antigen CD41)                                                                   | 1644           | 1.44     | 0.00581 | -1.58    | 0.01623 | 1.17     | 0.24084 | -1.79    | 0.00486 | -1.67    | 0.00097 | -1.45    | 0.01784 | -1.19    | 0.14249 | -1.19    | 0.14249 |
| ITGAE                                                    | 205055_at    | lymphocyte antigen 1, alpha polypeptide                                                                                                            | 3873           | -1.57    | 0.00000 | -1.47    | 0.00001 | -1.59    | 0.00000 | -1.43    | 0.00000 | -1.54    | 0.00000 | -1.47    | 0.00000 | -1.71    | 0.00000 | -1.71    | 0.00000 |
| JAK2                                                     | 205842_s_at  | Janus kinase 2 (a protein tyrosine kinase)                                                                                                         | 1457           | 1.64     | 0.00000 | 1.16     | 0.00618 | 1.42     | 0.00000 | 1.15     | 0.13422 | 1.08     | 0.42341 | 1.03     | 0.74974 | 1.12     | 0.22717 | 1.12     | 0.22717 |
| JAK2                                                     | 205841_at    | Janus kinase 2 (a protein tyrosine kinase)                                                                                                         | 326            | 1.65     | 0.00004 | 1.16     | 0.14528 | 1.25     | 0.01794 | -1.29    | 0.05805 | -1.07    | 0.42345 | -1.01    | 0.96680 | -1.16    | 0.14795 | -1.16    | 0.14795 |
| JUP                                                      | 201015_s_at  | junction plakoglobin                                                                                                                               | 549            | 3.39*    | 0.00000 | 1.86*    | 0.00046 | 2.93*    | 0.00000 | 2.51*    | 0.00019 | 1.78*    | 0.00188 | 1.87*    | 0.00646 | 2.03*    | 0.00139 | 2.03*    | 0.00139 |
| KCTD14                                                   | 58916_at     | potassium channel tetramerisation domain containing 14                                                                                             | 151            | 1.82*    | 0.00002 | 1.63*    | 0.00002 | 2.24*    | 0.00001 | 1.50*    | 0.00208 | ND       |         | 1.34*    | 0.02279 | 1.31*    | 0.00084 | 1.31*    | 0.00084 |
| KIAA0125                                                 | 206478_at    | KIAA0125                                                                                                                                           | 947            | -1.57    | 0.00000 | -1.14    | 0.17871 | -1.37    | 0.00081 | -1.18    | 0.20607 | -1.02    | 0.87180 | -1.05    | 0.65459 | -1.13    | 0.24014 | -1.13    | 0.24014 |
| KIAA0430                                                 | 202386_s_at  | KIAA0430                                                                                                                                           | 2757           | 1.07     | 0.12730 | 1.16     | 0.00395 | 1.19     | 0.00030 | 1.39     | 0.00039 | 1.42     | 0.00001 | 1.5      | 0.00235 | 1.6      | 0.00076 | 1.6      | 0.00076 |
| KIAA1466                                                 | 222139_at    | KIAA1466 gene                                                                                                                                      | 430            | 1.64     | 0.00002 | 1.46     | 0.01651 | 1.56     | 0.00192 | 1.05     | 0.62352 | 1.33     | 0.01236 | 1.29     | 0.01021 | 1.45     | 0.00221 | 1.45     | 0.00221 |
| KIR2DL4                                                  | 208426_x_at  | killer cell immunoglobulin-like receptor, two domains, long cytoplasmic tail, 4                                                                    | 606            | 1.19     | 0.02849 | 1.12     | 0.17349 | 1.18     | 0.04725 | 1.14     | 0.10311 | 1.27     | 0.00654 | 1.16     | 0.04997 | 1.52     | 0.00003 | 1.52     | 0.00003 |
| KLF4                                                     | 221841_s_at  | Kruppel-like factor 4 (gut)                                                                                                                        | 7570           | -1.04    | 0.67717 | -1.43    | 0.00123 | -1.23    | 0.03220 | -1.58    | 0.00100 | -1.48    | 0.00016 | -1.55    | 0.00028 | -1.23    | 0.01153 | -1.23    | 0.01153 |
| KLF4                                                     | 220266_s_at  | Kruppel-like factor 4 (gut)                                                                                                                        | 1812           | -1.1     | 0.30637 | -1.26    | 0.02746 | -1.21    | 0.06797 | -1.49    | 0.00716 | -1.64    | 0.00001 | -1.69    | 0.00083 | -1.33    | 0.01373 | -1.33    | 0.01373 |
| KLF9                                                     | 203542_s_at  | Kruppel-like factor 9                                                                                                                              | 1371           | -1.39    | 0.03089 | -1.05    | 0.79164 | -1.1     | 0.53720 | -1.57    | 0.00026 | -1.11    | 0.40340 | -1.49    | 0.00491 | -1.13    | 0.39022 | -1.13    | 0.39022 |
| KLHL21                                                   | 203068_at    | kelch-like 21 (Drosophila)                                                                                                                         | 746            | -1.30#   | 0.01225 | -1.14    | 0.28866 | -1.56#   | 0.00040 | -1.22#   | 0.06043 | -1.47#   | 0.00373 | -1.43#   | 0.00510 | -1.62#   | 0.00025 | -1.62#   | 0.00025 |
| KLRB1                                                    | 214470_at    | killer cell lectin-like receptor subfamily B, member 1                                                                                             | 9732           | -1.41    | 0.00004 | -1.21    | 0.00155 | -1.32    | 0.00004 | -1.25    | 0.00411 | -1.32    | 0.00001 | -1.37    | 0.00002 | -1.5     | 0.00001 | -1.5     | 0.00001 |
| KLRD1                                                    | 207795_s_at  | killer cell lectin-like receptor subfamily D, member 1                                                                                             | 2957           | 1.51     | 0.00000 | 1.34     | 0.00043 | 1.32     | 0.00075 | 1.43     | 0.00004 | 1.11     | 0.23922 | 1.01     | 0.90546 | 1.05     | 0.35928 | 1.05     | 0.35928 |
| KMO                                                      | 211138_s_at  | kynurenine 3-monooxygenase (kynurenine 3-hydroxylase)                                                                                              | 791            | 1.77     | 0.00000 | 1.24     | 0.00395 | 1.64     | 0.00000 | 1.29     | 0.00005 | 1.24     | 0.00379 | 1.3      | 0.00605 | 1.23     | 0.00291 | 1.23     | 0.00291 |
| KMO                                                      | 205306_x_at  | kynurenine 3-monooxygenase (kynurenine 3-hydroxylase)                                                                                              | 699            | 1.73     | 0.00000 | 1.23     | 0.00273 | 1.57     | 0.00000 | 1.33     | 0.00005 | 1.27     | 0.00030 | 1.26     | 0.00193 | 1.22     | 0.00231 | 1.22     | 0.00231 |
| KRT10                                                    | 207023_x_at  | keratin 10 (epidermolytic hyperkeratosis; keratosis palmaris et plantaris)                                                                         | 3120           | -1.54    | 0.00000 | -1.3     | 0.00033 | -1.47    | 0.00000 | -1.46    | 0.00002 | -1.31    | 0.00232 | -1.37    | 0.00004 | -1.43    | 0.00011 | -1.43    | 0.00011 |

Supplementary table 1 (a)\_h\_j1

| Gene Symbol    | Probe Set ID | Gene Title                                                                               | Day 1          | Day 3    |         | Day 6    |         | Day 10   |         | Day 13   |         | Day 27   |         | Day 42   |         | Day 70   |         |
|----------------|--------------|------------------------------------------------------------------------------------------|----------------|----------|---------|----------|---------|----------|---------|----------|---------|----------|---------|----------|---------|----------|---------|
|                |              |                                                                                          | mean<br>signal | Fold Chg | p-value |
| KRT10          | 210633_x_at  | keratin 10 (epidermolytic hyperkeratosis; keratosis palmaris et plantaris)               | 4516           | -1.63    | 0.00000 | -1.37    | 0.00042 | -1.6     | 0.00000 | -1.53    | 0.00003 | -1.37    | 0.00073 | -1.41    | 0.00086 | -1.45    | 0.00036 |
| LAG3           | 206486_at    | lymphocyte-activation gene 3                                                             | 434            | 1.75*    | 0.00000 | 1.47*    | 0.00022 | 1.81*    | 0.00000 | ND       | ND      | ND       | ND      | ND       | ND      | ND       | ND      |
| LAMP3          | 205569_at    | lysosomal-associated membrane protein 3                                                  | 185            | 6.02*    | 0.00000 | 3.11*    | 0.00000 | 6.68*    | 0.00000 | 3.29*    | 0.00000 | 3.80*    | 0.00000 | 3.93*    | 0.00000 | 4.41*    | 0.00000 |
| LAP3           | 217933_s_at  | leucine aminopeptidase 3                                                                 | 3873           | 2.04     | 0.00000 | 1.49     | 0.00001 | 1.96     | 0.00000 | 1.53     | 0.00017 | 1.44     | 0.00035 | 1.48     | 0.00258 | 1.59     | 0.00000 |
| LBA1           | 213261_at    | lupus brain antigen 1                                                                    | 1508           | 1.52     | 0.00000 | 1.29     | 0.00006 | 1.49     | 0.00000 | 1.38     | 0.00003 | 1.26     | 0.00349 | 1.32     | 0.00000 | 1.24     | 0.00008 |
| LCN2           | 212531_at    | lipocalin 2 (oncogene 24p3)                                                              | 559            | 1.75*    | 0.01044 | 1.32*    | 0.07925 | 2.62*    | 0.00001 | 1.92*    | 0.00147 | 1.83*    | 0.00028 | 1.76*    | 0.00162 | 2.84*    | 0.00012 |
| LDLR           | 202068_s_at  | low density lipoprotein receptor (familial hypercholesterolemia)                         | 994            | 1.7      | 0.00001 | 1.39     | 0.00003 | 1.5      | 0.00002 | 1.33     | 0.00168 | 1.35     | 0.00023 | 1.35     | 0.00041 | 1.37     | 0.00001 |
| LEPR           | 209894_at    | leptin receptor                                                                          | 154            | -1.16    | 0.09118 | -1.38    | 0.00131 | -1.09    | 0.18777 | -1.48    | 0.00890 | -1.57    | 0.00010 | -1.22    | 0.05404 | -1.19    | 0.15730 |
| LGALS3BP       | 200923_at    | lectin, galactoside-binding, soluble, 3 binding protein                                  | 970            | 3.99*    | 0.00000 | 2.23*    | 0.00000 | 4.02*    | 0.00000 | 2.84*    | 0.00000 | 2.61*    | 0.00005 | 2.95*    | 0.00000 | 3.14*    | 0.00000 |
| LGALS9         | 203236_s_at  | lectin, galactoside-binding, soluble, 9 (galectin 9)                                     | 1832           | 1.88     | 0.00000 | 1.34     | 0.00037 | 1.75     | 0.00000 | 1.48     | 0.00001 | 1.31     | 0.00145 | 1.54     | 0.00006 | 1.67     | 0.00001 |
| LILRA1         | 210660_at    | leukocyte immunoglobulin-like receptor, subfamily A (with TM domain), member 1           | 2204           | 1.18     | 0.03025 | -1.32    | 0.00001 | -1.06    | 0.40321 | -1.32    | 0.00301 | -1.5     | 0.00003 | -1.28    | 0.02738 | -1.19    | 0.03794 |
| LILRA2         | 211102_s_at  | leukocyte immunoglobulin-like receptor, subfamily A (with TM domain), member 2           | 981            | 1.15     | 0.03835 | -1.1     | 0.13326 | -1.01    | 0.87071 | -1.18    | 0.03044 | -1.54    | 0.00000 | -1.34    | 0.00681 | -1.33    | 0.00169 |
| LILRA3         | 206881_s_at  | leukocyte immunoglobulin-like receptor, subfamily A (without TM domain), member 3        | 1824           | 1.57     | 0.00001 | -1.04    | 0.72135 | 1.29     | 0.01684 | 1.08     | 0.44151 | -1.08    | 0.46215 | 1.18     | 0.26344 | 1.27     | 0.05120 |
| LILRB2         | 210146_x_at  | leukocyte immunoglobulin-like receptor, subfamily B (with TM and ITIM domains), member 2 | 2758           | 1.54     | 0.00000 | 1.07     | 0.43348 | 1.32     | 0.00268 | -1.04    | 0.66149 | -1.08    | 0.36402 | 1.04     | 0.67447 | 1.08     | 0.30925 |
| LOC150759      | 213703_at    | hypothetical protein LOC150759                                                           | 356            | -1.04    | 0.55740 | 1.53     | 0.00006 | 1.26     | 0.07798 | 1.16     | 0.11009 | 1.31     | 0.03802 | 1.43     | 0.00255 | 1.39     | 0.02541 |
| LOC26010       | 222154_s_at  | viral DNA polymerase-transactivated protein 6                                            | 857            | 4.32     | 0.00000 | 2.45     | 0.00000 | 4.17     | 0.00000 | 3.03     | 0.00000 | 2.97     | 0.00000 | 3.06     | 0.00000 | 3.28     | 0.00000 |
| LOC391020      | 216565_x_at  | interferon induced transmembrane protein                                                 | 2444           | 2.68     | 0.00000 | 1.96     | 0.00000 | 2.65     | 0.00000 | 2.17     | 0.00000 | 2.13     | 0.00000 | 2.18     | 0.00000 | 2.48     | 0.00000 |
| LOC442171      | 217379_at    | pseudogene                                                                               | 9003           | -1.65    | 0.00000 | -1.25    | 0.01718 | -1.55    | 0.00000 | -1.44    | 0.00003 | -1.42    | 0.00036 | -1.37    | 0.00039 | -1.52    | 0.00000 |
| LOC442215      | 217142_at    | similar to Elongation Factor family member (eft-4)                                       | 873            | -1.63    | 0.00017 | -1.23    | 0.12208 | -1.59    | 0.00054 | -1.49    | 0.00588 | -1.23    | 0.01830 | -1.47    | 0.00246 | -1.4     | 0.00225 |
| LST1           | 214181_x_at  | leukocyte specific transcript 1                                                          | 6884           | 1.03     | 0.67475 | -1.45    | 0.00024 | -1.27    | 0.01046 | -1.42    | 0.00112 | -1.6     | 0.00006 | -1.39    | 0.00616 | -1.38    | 0.00072 |
| LST1           | 215633_x_at  | leukocyte specific transcript 1                                                          | 6680           | 1.05     | 0.45336 | -1.46    | 0.00005 | -1.25    | 0.00769 | -1.4     | 0.00203 | -1.6     | 0.00009 | -1.39    | 0.00855 | -1.42    | 0.00083 |
| LTA4H          | 208771_s_at  | leukotriene A4 hydrolase                                                                 | 15548          | -1.73    | 0.00000 | -1.74    | 0.00000 | -1.95    | 0.00000 | -1.71    | 0.00001 | -1.55    | 0.00007 | -1.61    | 0.00000 | -1.62    | 0.00001 |
| LY6E           | 202145_at    | lymphocyte antigen 6 complex, locus E                                                    | 2143           | 4.11     | 0.00000 | 2.68     | 0.00000 | 3.98     | 0.00000 | 3.07     | 0.00000 | 2.78     | 0.00000 | 3.04     | 0.00000 | 3.39     | 0.00000 |
| MAFB           | 218559_s_at  | v-maf musculoaponeurotic fibrosarcoma oncogene homolog B (avian)                         | 4224           | 1.65     | 0.00000 | 1.24     | 0.04572 | 1.52     | 0.00011 | 1.23     | 0.24339 | 1.16     | 0.06186 | 1.22     | 0.09459 | 1.12     | 0.21386 |
| MAP3K12        | 205448_s_at  | mitogen-activated protein kinase kinase kinase 12                                        | 560            | -1.14    | 0.07723 | -1.12    | 0.05936 | -1.08    | 0.30760 | -1.43    | 0.00011 | -1.1     | 0.40330 | -1.28#   | 0.00146 | -1.5     | 0.00047 |
| MARCKS         | 201670_s_at  | myristoylated alanine-rich protein kinase C substrate                                    | 896            | 2.43     | 0.00000 | 1.14     | 0.20741 | 1.82     | 0.00002 | 1.13     | 0.42762 | 1.12     | 0.39994 | -1.05    | 0.72064 | 1.26     | 0.12299 |
| MARCKS         | 201669_s_at  | myristoylated alanine-rich protein kinase C substrate                                    | 3083           | 2.07     | 0.00000 | 1.2      | 0.02656 | 1.69     | 0.00000 | 1.25     | 0.05666 | 1.13     | 0.17988 | 1.17     | 0.13138 | 1.22     | 0.02941 |
| MARCKS         | 201668_x_at  | myristoylated alanine-rich protein kinase C substrate                                    | 412            | 1.93     | 0.00069 | 1.19     | 0.06105 | 1.4      | 0.00035 | 1.01     | 0.88069 | 1.13#    | 0.21574 | 1.05#    | 0.73004 | 1.13     | 0.34104 |
| MARCKS         | 213002_at    | myristoylated alanine-rich protein kinase C substrate                                    | 836            | 1.74     | 0.00000 | 1.15     | 0.07049 | 1.44     | 0.00073 | 1.11     | 0.39621 | 1.15     | 0.04558 | 1.04     | 0.62333 | 1.1      | 0.22370 |
| MARCO          | 205819_at    | macrophage receptor with collagenous structure                                           | 140            | 2.58*    | 0.00009 | ND       | ND      |
| MARK2          | 203942_s_at  | MAP/microtubule affinity-regulating kinase 2                                             | 639            | -1.09    | 0.26664 | -1.14    | 0.21105 | -1.2     | 0.03976 | -1.1     | 0.26517 | -1.41#   | 0.00012 | -1.50#   | 0.00050 | -1.25    | 0.01759 |
| MEGF9          | 212831_at    | multiple EGF-like-domains 9                                                              | 510            | -1.37    | 0.00607 | -1.75#   | 0.00014 | -1.45#   | 0.00879 | -1.62#   | 0.01539 | -1.54#   | 0.00246 | -1.72#   | 0.00006 | -1.18#   | 0.13295 |
| MGC5618        | 221477_s_at  | hypothetical protein MGC5618                                                             | 2232           | -1.27    | 0.08924 | -1.57    | 0.00735 | -1.59    | 0.00122 | -1.67    | 0.00007 | -1.48    | 0.00960 | -1.6     | 0.00137 | -1.69    | 0.00040 |
| MICAL2         | 212473_s_at  | microtubule associated monooxygenase, calponin and LIM domain containing 2               | 2623           | -1.63    | 0.00000 | -1.44    | 0.00002 | -1.49    | 0.00000 | 1        | 0.98122 | -1.01    | 0.92530 | 1.01     | 0.92674 | 1.15     | 0.24246 |
| MICAL2         | 212472_at    | microtubule associated monooxygenase, calponin and LIM domain containing 2               | 1906           | -1.68    | 0.00000 | -1.46    | 0.00049 | -1.56    | 0.00004 | -1.07    | 0.73078 | -1.11    | 0.41955 | -1       | 0.99629 | 1.13     | 0.37395 |
| MLC1           | 213395_at    | megalencephalic leukoencephalopathy with subcortical cysts 1                             | 297            | ND       | ND      | ND       | ND      | ND       | ND      | 1.51*    | 0.02751 | ND       | ND      | ND       | ND      | 1.74*    | 0.00022 |
| MMRN1          | 205612_at    | multimerin 1                                                                             | 100            | 1.22     | 0.28054 | -1.32    | 0.01295 | -1.05    | 0.74988 | -1.32#   | 0.03212 | -1.45#   | 0.00734 | -1.67#   | 0.00081 | -1.50#   | 0.00877 |
| MRPL42         | 217919_s_at  | mitochondrial ribosomal protein L42                                                      | 1409           | 1.53     | 0.00003 | 1.27     | 0.00690 | 1.34     | 0.01092 | 1.3      | 0.03812 | 1.16     | 0.10065 | 1.12     | 0.21335 | 1.14     | 0.11808 |
| MRPS12         | 204330_s_at  | mitochondrial ribosomal protein S12                                                      | 148            | 1.19     | 0.10127 | 1.28     | 0.02929 | 1.35     | 0.00857 | 1.26     | 0.09073 | 1.58     | 0.00060 | 1.32     | 0.03246 | 1.5      | 0.00630 |
| MS4A4A         | 219607_s_at  | membrane-spanning 4-domains, subfamily A, member 4                                       | 588            | 3.86     | 0.00000 | 1.36     | 0.02743 | 2.59     | 0.00000 | 1.64     | 0.00163 | 1.54     | 0.00429 | 1.97     | 0.00178 | 1.67     | 0.00009 |
| MT1E           | 212859_x_at  | metallothionein 1E                                                                       | 1847           | 1.74     | 0.00000 | 1.33     | 0.00042 | 1.63     | 0.00001 | 1.34     | 0.00846 | 1.17     | 0.16731 | 1.39     | 0.00576 | 1.44     | 0.00001 |
| MT1F           | 217165_x_at  | metallothionein 1F                                                                       | 1263           | 1.8      | 0.00000 | 1.28     | 0.00067 | 1.77     | 0.00000 | 1.28     | 0.01099 | 1.25     | 0.01476 | 1.23     | 0.01319 | 1.38     | 0.00037 |
| MT1G           | 204745_x_at  | metallothionein 1G                                                                       | 2358           | 1.63     | 0.00000 | 1.19     | 0.01953 | 1.54     | 0.00001 | 1.17     | 0.01654 | 1.18     | 0.00071 | 1.27     | 0.00210 | 1.38     | 0.00000 |
| MT1P2          | 211456_x_at  | metallothionein 1 pseudogene 2                                                           | 2938           | 2.38     | 0.00000 | 1.32     | 0.01842 | 2.01     | 0.00012 | 1.38     | 0.00862 | 1.22     | 0.02554 | 1.35     | 0.02432 | 1.71     | 0.00000 |
| MT1P2 /// MT1A |              | metallothionein 1A /// metallothionein 1M ///                                            |                |          |         |          |         |          |         |          |         |          |         |          |         |          |         |
| /// MT1M       | 216336_x_at  | metallothionein 1 pseudogene 2                                                           | 1363           | 1.72     | 0.00000 | 1.24     | 0.00222 | 1.72     | 0.00000 | 1.34     | 0.00746 | 1.21     | 0.02322 | 1.34     | 0.00141 | 1.56     | 0.00000 |
| MT1P2 /// MT1H | 206461_x_at  | metallothionein 1H /// metallothionein 1 pseudogene 2                                    | 2264           | 2.28     | 0.00000 | 1.45     | 0.00064 | 2.12     | 0.00000 | 1.46     | 0.00079 | 1.34     | 0.00160 | 1.49     | 0.00007 | 1.66     | 0.00017 |
| MT1X           | 208581_x_at  | metallothionein 1X                                                                       | 3045           | 2.49     | 0.00000 | 1.53     | 0.00015 | 2.24     | 0.00000 | 1.4      | 0.00192 | 1.25     | 0.02202 | 1.36     | 0.00081 | 1.67     | 0.00021 |

Supplementary table 1 (a)\_h\_1

| Gene Symbol | Probe Set ID | Gene Title                                                                         | Day 1       | Day 3    |         | Day 6    |         | Day 10   |         | Day 13   |         | Day 27   |         | Day 42   |         | Day 70   |         |
|-------------|--------------|------------------------------------------------------------------------------------|-------------|----------|---------|----------|---------|----------|---------|----------|---------|----------|---------|----------|---------|----------|---------|
|             |              |                                                                                    | mean signal | Fold Chg | p-value |
| MT1X        | 204326_x_at  | metallothionein 1X                                                                 | 1682        | 1.56     | 0.00000 | 1.29     | 0.00005 | 1.57     | 0.00000 | 1.24     | 0.00607 | 1.26     | 0.00311 | 1.28     | 0.00026 | 1.39     | 0.00008 |
| MT2A        | 212185_x_at  | metallothionein 2A                                                                 | 8207        | 2.03     | 0.00000 | 1.37     | 0.00063 | 1.91     | 0.00000 | 1.26     | 0.00606 | 1.29     | 0.00091 | 1.37     | 0.00030 | 1.49     | 0.00001 |
| MTMR11      | 205076_s_at  | myotubularin related protein 11                                                    | 1645        | -1.06    | 0.23040 | -1.43    | 0.00010 | -1.21    | 0.03474 | -1.43    | 0.00013 | -1.5     | 0.00001 | -1.35    | 0.00241 | -1.42    | 0.00013 |
| MX1         | 202086_at    | myxovirus (influenza virus) resistance 1, interferon-inducible protein p78 (mouse) | 4087        | 5.02     | 0.00000 | 3.52     | 0.00000 | 4.88     | 0.00000 | 3.81     | 0.00000 | 3.74     | 0.00000 | 3.93     | 0.00000 | 4.13     | 0.00000 |
| MX2         | 204994_at    | myxovirus (influenza virus) resistance 2 (mouse)                                   | 3661        | 3.13     | 0.00000 | 2.1      | 0.00000 | 2.92     | 0.00000 | 2.21     | 0.00000 | 2.23     | 0.00000 | 2.34     | 0.00000 | 2.43     | 0.00000 |
| MYCL1       | 214058_at    | v-myc myelocytomatosis viral oncogene homolog 1, lung carcinoma derived (avian)    | 1261        | 1.06     | 0.47987 | -1.23    | 0.00602 | -1.07    | 0.37074 | -1.22    | 0.05582 | -1.39    | 0.00048 | -1.29    | 0.00699 | -1.57    | 0.00001 |
| MYL4        | 210088_x_at  | myosin, light chain 4, alkali; atrial, embryonic                                   | 698         | -1.01    | 0.89481 | -1.06    | 0.62400 | 1.41     | 0.00428 | 2.23     | 0.06526 | 2.93     | 0.00301 | 3.23     | 0.01850 | 3.71     | 0.00070 |
| MYL4        | 217274_x_at  | myosin, light chain 4, alkali; atrial, embryonic                                   | 406         | 1.04     | 0.63769 | 1.08#    | 0.56747 | 1.37     | 0.00918 | 1.86     | 0.01837 | 2.52     | 0.00075 | 2.48     | 0.00466 | 3.18     | 0.00010 |
| N4BP1       | 204601_at    | Nedd4 binding protein 1                                                            | 752         | 1.92*    | 0.00000 | 1.46*    | 0.00044 | 1.70*    | 0.00000 | 1.45*    | 0.00001 | 1.27*    | 0.02422 | 1.38*    | 0.00143 | 1.18*    | 0.01345 |
| N4BP1       | 221867_at    | Nedd4 binding protein 1                                                            | 677         | 1.54     | 0.00000 | 1.54     | 0.00000 | 1.71     | 0.00000 | 1.56     | 0.00000 | 1.57     | 0.00002 | 1.71     | 0.00003 | 1.59     | 0.00000 |
| N4BP1       | 32069_at     | Nedd4 binding protein 1                                                            | 889         | 1.83     | 0.00000 | 1.54     | 0.00000 | 1.85     | 0.00000 | 1.56     | 0.00001 | 1.54     | 0.00001 | 1.43     | 0.00007 | 1.54     | 0.00000 |
| NDC80       | 204162_at    | NDC80 homolog, kinetochore complex component (S. cerevisiae)                       | 165         | 1.51     | 0.00001 | 1.15     | 0.15726 | 1.37     | 0.00222 | 1.23#    | 0.11073 | 1.22#    | 0.09451 | 1.32#    | 0.02042 | 1.33#    | 0.01371 |
| NELL2       | 203413_at    | NEL-like 2 (chicken)                                                               | 4486        | -1.51    | 0.00002 | -1.06    | 0.17764 | -1.41    | 0.00000 | -1.28    | 0.00440 | -1.01    | 0.92974 | -1.14    | 0.04230 | -1.1     | 0.09855 |
| NGFRAP1     | 217963_s_at  | nerve growth factor receptor (TNFRSF16)                                            | 3633        | 1.67     | 0.00025 | 1.14     | 0.15893 | 1.71     | 0.00038 | 1.31     | 0.05180 | 1.64     | 0.00000 | 1.61     | 0.00105 | 2.26     | 0.00000 |
| NMI         | 203964_at    | associated protein 1                                                               | 3919        | 1.86     | 0.00000 | 1.27     | 0.00106 | 1.63     | 0.00000 | 1.37     | 0.00000 | 1.23     | 0.01096 | 1.24     | 0.00757 | 1.32     | 0.00005 |
| NRG1        | 206343_s_at  | N-myc (and STAT) interactor                                                        | 863         | -2.73#   | 0.00009 | -1.70#   | 0.00761 | -2.55#   | 0.00032 | -1.78#   | 0.00875 | -1.82#   | 0.00082 | -1.50#   | 0.02875 | -1.55#   | 0.04408 |
| NRGN        | 204081_at    | neuregulin 1                                                                       | 8064        | 1.3      | 0.06488 | -1.43    | 0.01201 | 1.17     | 0.15988 | -1.56    | 0.00188 | -1.62    | 0.00002 | -1.37    | 0.03281 | 1        | 0.96273 |
| OAS1        | 205552_s_at  | neurogranin (protein kinase C substrate, RC3)                                      | 1310        | 4.29     | 0.00000 | 2.4      | 0.00000 | 3.76     | 0.00000 | 2.51     | 0.00000 | 2.08     | 0.00008 | 2.33     | 0.00007 | 2.33     | 0.00000 |
| OAS1        | 202869_at    | 2',5'-oligoadenylate synthetase 1, 40/46kDa                                        | 2334        | 3.91     | 0.00000 | 2.04     | 0.00000 | 3.51     | 0.00000 | 2.37     | 0.00001 | 1.98     | 0.00002 | 2.65     | 0.00003 | 2.3      | 0.00002 |
| OAS2        | 204972_at    | 2',5'-oligoadenylate synthetase 1, 40/46kDa                                        | 2791        | 3.5      | 0.00000 | 2.37     | 0.00000 | 3.4      | 0.00000 | 2.9      | 0.00000 | 2.4      | 0.00000 | 2.49     | 0.00000 | 2.49     | 0.00000 |
| OAS2        | 206553_at    | 2',5'-oligoadenylate synthetase 2, 69/71kDa                                        | 833         | 1.93     | 0.00000 | 1.49     | 0.00000 | 1.99     | 0.00000 | 1.57     | 0.00000 | 1.6      | 0.00007 | 1.51     | 0.00008 | 1.57     | 0.00001 |
| OAS3        | 218400_at    | 2',5'-oligoadenylate synthetase 3, 100kDa                                          | 2136        | 4.48     | 0.00000 | 2.64     | 0.00000 | 3.76     | 0.00000 | 2.74     | 0.00000 | 2.34     | 0.00001 | 2.45     | 0.00001 | 2.83     | 0.00000 |
| OASL        | 205660_at    | 2',5'-oligoadenylate synthetase-like                                               | 954         | 4.56     | 0.00000 | 2.13     | 0.00000 | 4.07     | 0.00000 | 2.65     | 0.00000 | 2.23     | 0.00000 | 2.45     | 0.00000 | 2.58     | 0.00000 |
| OASL        | 210797_s_at  | 2',5'-oligoadenylate synthetase-like                                               | 1144        | 4.02     | 0.00000 | 2.39     | 0.00000 | 3.69     | 0.00000 | 2.55     | 0.00000 | 2.32     | 0.00000 | 2.55     | 0.00000 | 2.51     | 0.00000 |
| OLFM1       | 213131_at    | olfactomedin 1                                                                     | 371         | -2.34#   | 0.00000 | -1.44    | 0.00432 | -1.79#   | 0.00023 | -1.18#   | 0.04273 | -1.38#   | 0.01579 | -1.31#   | 0.00466 | -1.23#   | 0.16443 |
| P2RX7       | 207091_at    | olfactomedin 1                                                                     | 404         | 1.05     | 0.51215 | -1.07    | 0.35499 | -1.14    | 0.07667 | -1.22#   | 0.08093 | -1.55#   | 0.00033 | -1.32#   | 0.01196 | -1.38#   | 0.00094 |
| P2RY13      | 220005_at    | purinergic receptor P2X, ligand-gated ion channel, 7                               | 1470        | 1.41     | 0.03370 | -1.25    | 0.09869 | 1.08     | 0.61443 | -1.09    | 0.34985 | -1.62    | 0.00005 | -1.31    | 0.11287 | -1.58    | 0.01795 |
| PABPC4      | 201064_s_at  | purinergic receptor P2Y, G-protein coupled, 13                                     | 3291        | -1.53    | 0.00000 | -1.31    | 0.00008 | -1.49    | 0.00000 | -1.41    | 0.00001 | -1.27    | 0.00024 | -1.4     | 0.00000 | -1.28    | 0.00003 |
| PALLD       | 200897_s_at  | poly(A) binding protein, cytoplasmic 4 (inducible form)                            | 531         | -1.06    | 0.55671 | -1.3     | 0.00072 | -1.34    | 0.00352 | -1.4     | 0.00134 | -1.62    | 0.00007 | -1.47    | 0.00125 | -1.55    | 0.00007 |
| PAPSS2      | 203060_s_at  | palladin, cytoskeletal associated protein                                          | 319         | -1.73#   | 0.00005 | -1.74#   | 0.00001 | -1.76#   | 0.00001 | -1.58#   | 0.00008 | -1.55#   | 0.00005 | -1.32#   | 0.00424 | -1.57#   | 0.00000 |
| PARP11      | 220315_at    | 3'-phosphoadenosine 5'-phosphosulfate synthase 2                                   | 172         | 1.60*    | 0.00004 | 1.24*    | 0.00717 | 1.51*    | 0.00044 | 1.52*    | 0.00015 | ND       | ND      | ND       | ND      | 1.49*    | 0.00002 |
| PARP12      | 218543_s_at  | poly (ADP-ribose) polymerase family, member 11                                     | 3445        | 2.44     | 0.00000 | 1.79     | 0.00000 | 2.31     | 0.00000 | 1.77     | 0.00000 | 1.91     | 0.00000 | 1.91     | 0.00000 | 1.94     | 0.00000 |
| PARVB       | 216253_s_at  | poly (ADP-ribose) polymerase family, member 12                                     | 349         | -1.1     | 0.28329 | -1.36    | 0.00957 | -1.1     | 0.29959 | -1.18    | 0.08023 | -1.52    | 0.00008 | -1.21    | 0.07586 | -1.28    | 0.01914 |
| PCTP        | 218676_s_at  | parvin, beta                                                                       | 518         | -1.29    | 0.01758 | -1.64    | 0.00058 | -1.31    | 0.05446 | -1.07    | 0.56230 | 1.04     | 0.85209 | 1.17     | 0.62394 | 1.76     | 0.16714 |
| PDGFC       | 218718_at    | phosphatidylcholine transfer protein                                               | 1240        | -1.21    | 0.01160 | -1.51    | 0.00010 | -1.31    | 0.00241 | -1.57    | 0.00004 | -1.4     | 0.00025 | -1.33    | 0.00103 | -1.27    | 0.00560 |
| PDHB        | 211023_at    | platelet derived growth factor C                                                   | 3815        | 1        | 0.95283 | -1.13    | 0.25000 | -1.26    | 0.03026 | -1.14    | 0.16995 | -1.28    | 0.01524 | -1.13    | 0.25622 | -1.57    | 0.00047 |
| PF4         | 206390_x_at  | pyruvate dehydrogenase (lipoamide) beta                                            | 10386       | 1.7      | 0.00028 | 1.04     | 0.62465 | 1.62     | 0.00042 | -1.13    | 0.14207 | -1.12    | 0.13682 | -1.13    | 0.33129 | 1.24     | 0.04945 |
| PGAP1       | 213469_at    | platelet factor 4 (chemokine (C-X-C motif) ligand 4)                               | 67          | 2.00*    | 0.00002 | 1.80*    | 0.00021 | 2.27*    | 0.00000 | ND       | ND      | 1.98*    | 0.00000 | ND       | ND      | 2.04*    | 0.00000 |
| PGAP1       | 220576_at    | GPI deacylase                                                                      | 239         | 1.91     | 0.00000 | 1.7      | 0.00245 | 2.19     | 0.00068 | 1.23     | 0.00341 | 1.83     | 0.00001 | 1.82     | 0.00002 | 2.01     | 0.00014 |
| PHF11       | 221816_s_at  | GPI deacylase                                                                      | 5834        | 1.8      | 0.00000 | 1.59     | 0.00000 | 1.77     | 0.00000 | 1.6      | 0.00000 | 1.66     | 0.00000 | 1.7      | 0.00000 | 1.7      | 0.00000 |
| PHLDA2      | 209803_s_at  | PHD finger protein 11                                                              | 215         | 1.64     | 0.12643 | 1.34     | 0.09865 | 1.51     | 0.04184 | 1.18     | 0.37317 | 1.43     | 0.02906 | 1.28     | 0.05610 | 1.87     | 0.00059 |
| PID1        | 219093_at    | pleckstrin homology-like domain, family A, member 2                                | 1358        | -1.96    | 0.00005 | -1.75    | 0.00019 | -2.29    | 0.00002 | -1.76    | 0.00103 | -1.82    | 0.00007 | -1.87    | 0.00011 | -1.9     | 0.00038 |
| PILRA       | 219788_at    | phosphotyrosine interaction domain containing 1                                    | 1272        | 1.33     | 0.00144 | -1.11    | 0.18600 | -1.07    | 0.38478 | -1.27    | 0.00560 | -1.56    | 0.00000 | -1.44    | 0.00163 | -1.48    | 0.00003 |
| PIP4K2A     | 212829_at    | paired immunoglobulin-like type 2 receptor alpha                                   | 7793        | -1.03    | 0.39496 | 1.01     | 0.84386 | 1.03     | 0.53862 | 1.22     | 0.09077 | 1.24     | 0.00546 | 1.29     | 0.01886 | 1.58     | 0.00017 |
| PLAC8       | 219014_at    | phosphatidylinositol-5-phosphate 4-kinase, type II, alpha                          | 14056       | 1.85     | 0.00000 | 1.3      | 0.00007 | 1.71     | 0.00000 | 1.36     | 0.00001 | 1.35     | 0.00020 | 1.32     | 0.00037 | 1.4      | 0.00000 |
| PLSCR1      | 202446_s_at  | placenta-specific 8                                                                | 3924        | 3.06     | 0.00000 | 1.93     | 0.00000 | 2.8      | 0.00000 | 2.08     | 0.00000 | 2.06     | 0.00000 | 2.06     | 0.00000 | 2.36     | 0.00000 |
| PLSCR1      | 202430_s_at  | phospholipid scramblase 1                                                          | 934         | 2.6      | 0.00000 | 1.73     | 0.00000 | 2.39     | 0.00000 | 2.02     | 0.00000 | 1.81     | 0.00000 | 1.83     | 0.00001 | 1.88     | 0.00000 |
| PML III     | 211012_s_at  | phospholipid scramblase 1                                                          | 745         | 2.34*    | 0.00000 | 1.61*    | 0.00003 | 2.11*    | 0.00000 | ND       | ND      | ND       | ND      | ND       | ND      | 1.55*    | 0.00260 |
| LOC161527   | 205267_at    | promyelocytic leukemia III hypothetical protein                                    | 2449        | -1.51    | 0.00002 | -1.14    | 0.01881 | -1.44    | 0.00008 | -1.12    | 0.19448 | 1.04     | 0.58193 | -1.07    | 0.61991 | -1.15    | 0.24413 |
| POU2AF1     | 205267_at    | LOC161527                                                                          | 2449        | -1.51    | 0.00002 | -1.14    | 0.01881 | -1.44    | 0.00008 | -1.12    | 0.19448 | 1.04     | 0.58193 | -1.07    | 0.61991 | -1.15    | 0.24413 |
| PPBP        | 214146_s_at  | POU class 2 associating factor 1                                                   | 17295       | 1.19     | 0.00770 | -1.4     | 0.00008 | 1.03     | 0.69427 | -1.71    | 0.00001 | -1.61    | 0.00001 | -1.57    | 0.00057 | -1.15    | 0.15638 |
| PPM1F       | 37384_at     | pro-platelet basic protein (chemokine (C-X-C motif) ligand 7)                      | 2234        | -1.43    | 0.00008 | -1.48    | 0.00018 | -1.66    | 0.00000 | -1.42    | 0.00308 | -1.46    | 0.00042 | -1.29    | 0.00440 | -1.45    | 0.00007 |
| PPM1F       | 203063_at    | protein phosphatase 1F (PP2C domain containing)                                    | 2364        | -1.55    | 0.00153 | -1.61    | 0.00150 | -1.84    | 0.00040 | -1.58    | 0.00478 | -1.81    | 0.00051 | -1.37    | 0.02372 | -1.62    | 0.00057 |
| PPM2C       | 218273_s_at  | protein phosphatase 1F (PP2C domain containing)                                    | 1016        | -1.24    | 0.00162 | -1.17    | 0.04965 | -1.22    | 0.01531 | -1.49    | 0.00046 | -1.31    | 0.01081 | -1.51    | 0.00029 | -1.34    | 0.00479 |
| PRDX6       | 200844_s_at  | protein phosphatase 2C, magnesium-dependent, catalytic subunit                     | 3289        | 1.01     | 0.90005 | -1.08    | 0.07951 | 1.13     | 0.01382 | 1.22     | 0.09326 | 1.38     | 0.00503 | 1.37     | 0.02077 | 1.75     | 0.00054 |
| PRDX6       | 200844_s_at  | peroxiredoxin 6                                                                    | 3289        | 1.01     | 0.90005 | -1.08    | 0.07951 | 1.13     | 0.01382 | 1.22     | 0.09326 | 1.38     | 0.00503 | 1.37     | 0.02077 | 1.75     | 0.00054 |
| PRKAR2B     | 203680_at    | protein kinase, cAMP-dependent, regulatory, type II, beta                          | 2192        | 1.18     | 0.13891 | -1.46    | 0.00241 | 1.12     | 0.37012 | -1.69    | 0.00075 | -1.6     | 0.00073 | -1.5     | 0.00834 | -1.11    | 0.40896 |

Supplementary table 1 (a)\_h\_j1

| Gene Symbol                                                                  | Probe Set ID | Gene Title                                                                                  | Day 1          | Day 3    |         | Day 6    |         | Day 10   |         | Day 13   |         | Day 27   |         | Day 42   |         | Day 70   |         |
|------------------------------------------------------------------------------|--------------|---------------------------------------------------------------------------------------------|----------------|----------|---------|----------|---------|----------|---------|----------|---------|----------|---------|----------|---------|----------|---------|
|                                                                              |              |                                                                                             | mean<br>signal | Fold Chg | p-value |
| PRKCD                                                                        | 202545_at    | protein kinase C, delta                                                                     | 2771           | 1.1      | 0.06279 | -1.16    | 0.11778 | -1.08    | 0.24598 | -1.21    | 0.05144 | -1.62    | 0.00000 | -1.38    | 0.00360 | -1.47    | 0.00037 |
| PTAFR                                                                        | 206278_at    | platelet-activating factor receptor                                                         | 419            | -1.21    | 0.04324 | -1.37    | 0.01114 | -1.53    | 0.00058 | -1.60#   | 0.00084 | -1.86#   | 0.00000 | -1.63#   | 0.00028 | -1.81#   | 0.00032 |
| PTCH1                                                                        | 209815_at    | patched homolog 1 (Drosophila)                                                              | 666            | 1.22     | 0.00128 | 1.43     | 0.00025 | 1.26     | 0.00705 | 1.61     | 0.00056 | 1.22     | 0.02253 | 1.17     | 0.10535 | 1.06     | 0.61365 |
| PTOV1                                                                        | 212032_s_at  | prostate tumor overexpressed gene 1                                                         | 704            | -1.47#   | 0.00359 | -1.12    | 0.30765 | -1.54#   | 0.00410 | -1.42#   | 0.00230 | -1.59#   | 0.00097 | -1.54#   | 0.01858 | -1.62#   | 0.00048 |
| PTPRO                                                                        | 208121_s_at  | protein tyrosine phosphatase, receptor type, O                                              | 460            | 1.72     | 0.00001 | 1.22     | 0.03919 | 1.45     | 0.01164 | 1.2      | 0.10154 | 1.1      | 0.24103 | 1.12     | 0.15811 | -1.05    | 0.40871 |
| QARS                                                                         | 217846_at    | glutamyl-tRNA synthetase                                                                    | 6877           | -1.56    | 0.00000 | -1.38    | 0.00000 | -1.51    | 0.00000 | -1.33    | 0.00000 | -1.33    | 0.00000 | -1.3     | 0.00001 | -1.4     | 0.00000 |
| RAB31                                                                        | 217763_s_at  | RAB31, member RAS oncogene family                                                           | 3665           | -1.22    | 0.00393 | -1.53    | 0.00001 | -1.35    | 0.00002 | -1.44    | 0.00001 | -1.48    | 0.00001 | -1.35    | 0.00239 | -1.21    | 0.03929 |
| RABGAP1L                                                                     | 213982_s_at  | RAB GTPase activating protein 1-like                                                        | 2002           | 1.61     | 0.00000 | 1.17     | 0.00454 | 1.41     | 0.00000 | 1.22     | 0.00528 | 1.14     | 0.02797 | 1.22     | 0.00395 | 1.14     | 0.06268 |
| RBX1                                                                         | 218117_at    | ring-box 1                                                                                  | 3462           | 1.46     | 0.00000 | 1.2      | 0.01619 | 1.5      | 0.00000 | 1.41     | 0.00019 | 1.4      | 0.00004 | 1.4      | 0.00011 | 1.64     | 0.00000 |
| RGL1                                                                         | 209568_s_at  | ral guanine nucleotide dissociation stimulator-like 1                                       | 659            | 1.54     | 0.00000 | 1.28     | 0.00334 | 1.56     | 0.00002 | 1.22     | 0.00839 | 1.3      | 0.00002 | 1.42     | 0.00013 | 1.27     | 0.00003 |
| RGS1                                                                         | 216834_at    | regulator of G-protein signaling 1                                                          | 4361           | -1.43    | 0.06423 | -1.23    | 0.40107 | -1.43    | 0.13300 | -1.71    | 0.01831 | -1.33    | 0.10865 | -1.78    | 0.02656 | -2.36    | 0.00094 |
| RGS2                                                                         | 202388_at    | regulator of G-protein signaling 2, 24kDa                                                   | 19526          | -1.34    | 0.00201 | -1.42    | 0.00011 | -1.79    | 0.00000 | -1.57    | 0.00009 | -1.5     | 0.00004 | -1.56    | 0.00002 | -1.73    | 0.00000 |
| RHOB                                                                         | 212099_at    | ras homolog gene family, member B                                                           | 4049           | 1.65     | 0.00059 | 1.37     | 0.09397 | 1.18     | 0.32632 | 1.17     | 0.40469 | 1.19     | 0.34697 | -1.08    | 0.70536 | 1.07     | 0.60849 |
| RHOBTB1                                                                      | 212651_at    | Rho-related BTB domain containing 1                                                         | 102            | 2.50*    | 0.00009 | ND       |         | 2.41*    | 0.00065 | ND       |         | ND       |         | ND       |         | ND       |         |
| RIN2                                                                         | 209684_at    | Ras and Rab interactor 2                                                                    | 947            | 1.53     | 0.00010 | 1.01     | 0.93518 | 1.35     | 0.00395 | 1.11     | 0.15205 | -1.02    | 0.68325 | 1.08     | 0.44990 | 1.07     | 0.36964 |
| RNASE1                                                                       | 201785_at    | ribonuclease, RNase A family, 1 (pancreatic)                                                | 495            | 1.32*    | 0.01349 | 1.28*    | 0.05466 | 1.66*    | 0.00061 | ND       |         | 1.50*    | 0.01894 | 1.59*    | 0.00871 | 2.12*    | 0.00267 |
|                                                                              |              | ribonuclease, RNase A family, 2 (liver, eosinophil-derived neurotoxin)                      |                |          |         |          |         |          |         |          |         |          |         |          |         |          |         |
| RNASE2                                                                       | 206111_at    |                                                                                             | 3620           | 2.86     | 0.00000 | 1.85     | 0.00001 | 2.32     | 0.00000 | 1.76     | 0.00132 | 1.65     | 0.00002 | 1.73     | 0.00045 | 1.94     | 0.00000 |
| ROGDI                                                                        | 218394_at    | rogdi homolog (Drosophila)                                                                  | 1530           | -1.28    | 0.00001 | -1.52    | 0.00000 | -1.4     | 0.00002 | -1.26    | 0.00062 | -1.38    | 0.00002 | -1.23    | 0.00269 | -1.27    | 0.00627 |
| RP2                                                                          | 205191_at    | retinitis pigmentosa 2 (X-linked recessive)                                                 | 346            | 1.05     | 0.60752 | -1.29    | 0.02624 | -1.1     | 0.36854 | -1.16    | 0.07932 | -1.41    | 0.00011 | -1.16    | 0.09760 | -1.52    | 0.00001 |
| RPH3A                                                                        | 205230_at    | rabphilin 3A homolog (mouse)                                                                | 523            | -1.79    | 0.00188 | -1.71    | 0.00099 | -1.86    | 0.00054 | -1.68    | 0.00721 | -1.52    | 0.00212 | -1.68    | 0.00095 | -1.64    | 0.00524 |
|                                                                              |              | ribose 5-phosphate isomerase A (ribose 5-phosphate epimerase)                               |                |          |         |          |         |          |         |          |         |          |         |          |         |          |         |
| RPIA                                                                         | 212973_at    |                                                                                             | 2172           | -1.08    | 0.18904 | 1.02     | 0.62404 | 1.06     | 0.17144 | 1.37     | 0.05336 | 1.42     | 0.00048 | 1.43     | 0.01382 | 1.63     | 0.00085 |
| RPL10L                                                                       | 217559_at    | ribosomal protein L10-like                                                                  | 297            | -1.76#   | 0.00058 | -1.55    | 0.00041 | -1.11    | 0.23911 | -1.25#   | 0.11655 | 1.07     | 0.52035 | -1.21#   | 0.10899 | -1       | 0.96511 |
| RPL18A ///<br>hCG_2040224<br>/// LOC285053<br>/// LOC390354<br>/// LOC729955 |              | 60S ribosomal protein L18a /// similar to ribosomal protein L18a;                           | 988            | -1.48    | 0.00179 | -1.08    | 0.39132 | -1.4     | 0.01108 | -1.33    | 0.05189 | -1.24    | 0.06867 | -1.57    | 0.00229 | -1.67    | 0.00013 |
| RPL22                                                                        | 214042_s_at  | ribosomal protein L22                                                                       | 9528           | -1.52    | 0.00000 | -1.2     | 0.00051 | -1.4     | 0.00000 | -1.19    | 0.00400 | -1.13    | 0.07384 | -1.22    | 0.00069 | -1.22    | 0.00041 |
| RPL3                                                                         | 211666_x_at  | ribosomal protein L3                                                                        | 41213          | -1.51    | 0.00000 | -1.18    | 0.00000 | -1.35    | 0.00000 | -1.23    | 0.00017 | -1.12    | 0.00371 | -1.23    | 0.00000 | -1.22    | 0.00000 |
| RPL4                                                                         | 211710_x_at  | ribosomal protein L4                                                                        | 40945          | -1.58    | 0.00000 | -1.27    | 0.00000 | -1.5     | 0.00000 | -1.34    | 0.00002 | -1.22    | 0.00010 | -1.26    | 0.00006 | -1.36    | 0.00000 |
| RPL4                                                                         | 201154_x_at  | ribosomal protein L4                                                                        | 41802          | -1.63    | 0.00000 | -1.27    | 0.00000 | -1.55    | 0.00000 | -1.36    | 0.00004 | -1.27    | 0.00003 | -1.3     | 0.00016 | -1.42    | 0.00000 |
| RPL4                                                                         | 200089_s_at  | ribosomal protein L4                                                                        | 19883          | -1.56    | 0.00000 | -1.23    | 0.00000 | -1.45    | 0.00000 | -1.35    | 0.00001 | -1.25    | 0.00009 | -1.32    | 0.00005 | -1.43    | 0.00000 |
| RP55 ///<br>LOC392424                                                        |              | ribosomal protein S5 /// similar to ribosomal protein S5                                    | 27131          | -1.56    | 0.00000 | -1.26    | 0.00033 | -1.46    | 0.00000 | -1.28    | 0.00046 | -1.12    | 0.01883 | -1.18    | 0.00523 | -1.23    | 0.00295 |
| RRAS                                                                         | 212647_at    | related RAS viral (r-ras) oncogene homolog                                                  | 610            | 1.92     | 0.00000 | -1.02    | 0.87555 | 1.46     | 0.00231 | 1.16     | 0.19707 | -1.01    | 0.92829 | 1.12     | 0.38602 | 1.11     | 0.46655 |
| RSAD2                                                                        | 213797_at    | radical S-adenosyl methionine domain containing 2                                           | 616            | 12.78    | 0.00000 | 5.26     | 0.00000 | 11.56    | 0.00000 | 6.79     | 0.00000 | 6.43     | 0.00005 | 6.42     | 0.00000 | 6.59     | 0.00000 |
| RSL1D1                                                                       | 212019_at    | ribosomal L1 domain containing 1                                                            | 399            | -1.38#   | 0.00029 | -1.13#   | 0.09480 | -1.50#   | 0.00004 | -1.12    | 0.11135 | -1.14    | 0.10320 | -1.13#   | 0.14310 | -1.19    | 0.03466 |
| RTN1                                                                         | 210222_s_at  | reticulon 1                                                                                 | 1330           | -2.05    | 0.00000 | -1.97    | 0.00000 | -2.15    | 0.00000 | -1.93    | 0.00000 | -2.15    | 0.00000 | -1.93    | 0.00000 | -2.05    | 0.00000 |
| RTN1                                                                         | 203485_at    | reticulon 1                                                                                 | 985            | -2.17    | 0.00000 | -1.94    | 0.00004 | -2.29    | 0.00000 | -1.96    | 0.00001 | -1.99    | 0.00000 | -1.98    | 0.00000 | -2.25    | 0.00000 |
| RTN2                                                                         | 34408_at     | reticulon 2                                                                                 | 492            | -1.11    | 0.16442 | -1.53    | 0.00019 | -1.07    | 0.33146 | -1.18    | 0.08834 | -1.14    | 0.09135 | -1.06    | 0.46576 | 1.01     | 0.89214 |
| RTP4                                                                         | 219684_at    | receptor (chemosensory) transporter protein 4                                               | 638            | 3.13*    | 0.00000 | 1.71*    | 0.00307 | 2.59*    | 0.00005 | 2.04*    | 0.00002 | ND       |         | 1.72*    | 0.00193 | ND       |         |
| SAMD4A                                                                       | 215495_s_at  | sterile alpha motif domain containing 4A                                                    | 167            | 2.56*    | 0.00000 | ND       |         | 2.03*    | 0.00000 | ND       |         | ND       |         | ND       |         | ND       |         |
| SAMD4A                                                                       | 212845_at    | sterile alpha motif domain containing 4A                                                    | 541            | 2.77     | 0.00000 | 1.35     | 0.00423 | 2.18     | 0.00000 | 1.56     | 0.00038 | 1.32     | 0.02468 | 1.56     | 0.00346 | 1.48     | 0.00027 |
| SAMD9                                                                        | 219691_at    | sterile alpha motif domain containing 9                                                     | 514            | 3.82     | 0.00000 | 2.1      | 0.00001 | 3.26     | 0.00000 | 2.62     | 0.00000 | 2.05     | 0.00015 | 2.12     | 0.00004 | 2.01     | 0.00001 |
|                                                                              |              | SCO cytochrome oxidase deficient homolog 2 (yeast)                                          |                |          |         |          |         |          |         |          |         |          |         |          |         |          |         |
| SCO2                                                                         | 205241_at    |                                                                                             | 3018           | 2.28     | 0.00000 | 1.7      | 0.00020 | 2.03     | 0.00001 | 1.61     | 0.00580 | 1.58     | 0.00223 | 1.71     | 0.00017 | 1.94     | 0.00000 |
|                                                                              |              | sema domain, immunoglobulin domain (Ig), short                                              |                |          |         |          |         |          |         |          |         |          |         |          |         |          |         |
| SEMA3C                                                                       | 203789_s_at  | basic domain, secreted, (semaphorin) 3C                                                     | 194            | -1.66    | 0.00002 | -1.4     | 0.00700 | -1.5     | 0.00005 | -1.39    | 0.00296 | -1.48    | 0.00037 | -1.36    | 0.00215 | -1.5     | 0.00005 |
|                                                                              |              | serpin peptidase inhibitor, clade G (C1 inhibitor), member 1, (angioedema, hereditary)      |                |          |         |          |         |          |         |          |         |          |         |          |         |          |         |
| SERPING1                                                                     | 200986_at    |                                                                                             | 415            | 4.93     | 0.00000 | 1.87     | 0.00015 | 4.07     | 0.00000 | 2.25     | 0.00008 | 1.9      | 0.00062 | 1.99     | 0.00029 | 2.12     | 0.00000 |
| SIGLEC1                                                                      | 219519_s_at  | sialic acid binding Ig-like lectin 1, sialoadhesin                                          | 183            | 27.14*   | 0.00000 | 16.48*   | 0.00000 | 23.13*   | 0.00000 | 17.00*   | 0.00000 | 13.68*   | 0.00000 | 18.17*   | 0.00000 | 20.93*   | 0.00000 |
| SIGLEC1                                                                      | 44673_at     | sialic acid binding Ig-like lectin 1, sialoadhesin                                          | 679            | 6.41     | 0.00000 | 4.28     | 0.00000 | 5.54     | 0.00000 | 4.33     | 0.00000 | 3.55     | 0.00000 | 4.57     | 0.00000 | 4.88     | 0.00000 |
| SKAP2                                                                        | 204361_s_at  | src kinase associated phosphoprotein 2                                                      | 775            | -1.07    | 0.22501 | -1.26    | 0.00617 | -1.16    | 0.00805 | -1.31    | 0.00232 | -1.38    | 0.00004 | -1.52    | 0.00004 | -1.34    | 0.00010 |
|                                                                              |              | solute carrier family 14 (urea transporter), member 1 (Kidd blood group)                    |                |          |         |          |         |          |         |          |         |          |         |          |         |          |         |
| SLC14A1                                                                      | 205856_at    |                                                                                             | 124            | -1.24    | 0.02589 | 1.07     | 0.47745 | 1.21     | 0.11107 | 1.85     | 0.14698 | 1.91     | 0.04938 | 2.05     | 0.01073 | 2.19     | 0.00066 |
|                                                                              |              | solute carrier family 25 (mitochondrial carrier; adenine nucleotide translocator), member 6 |                |          |         |          |         |          |         |          |         |          |         |          |         |          |         |
| SLC25A6                                                                      | 212826_s_at  |                                                                                             | 18507          | -1.4     | 0.00001 | -1.36    | 0.00061 | -1.58    | 0.00000 | -1.64    | 0.00000 | -1.43    | 0.00003 | -1.42    | 0.00001 | -1.46    | 0.00000 |
|                                                                              |              | solute carrier family 25 (mitochondrial carrier; adenine nucleotide translocator), member 6 |                |          |         |          |         |          |         |          |         |          |         |          |         |          |         |
| SLC25A6                                                                      | 212085_at    |                                                                                             | 16829          | -1.57    | 0.00000 | -1.44    | 0.00000 | -1.59    | 0.00000 | -1.52    | 0.00000 | -1.42    | 0.00000 | -1.5     | 0.00000 | -1.55    | 0.00000 |
|                                                                              |              | solute carrier family 31 (copper transporters), member 2                                    |                |          |         |          |         |          |         |          |         |          |         |          |         |          |         |
| SLC31A2                                                                      | 204204_at    |                                                                                             | 2025           | 1.74     | 0.00000 | -1.17    | 0.08792 | 1.41     | 0.00051 | 1.08     | 0.35602 | -1.09    | 0.08252 | 1.08     | 0.48747 | -1.05    | 0.54131 |
|                                                                              |              | solute carrier family 7 (cationic amino acid transporter, y+ system), member 7              |                |          |         |          |         |          |         |          |         |          |         |          |         |          |         |
| SLC7A7                                                                       | 204588_s_at  |                                                                                             | 8576           | -1.07    | 0.19910 | -1.51    | 0.00000 | -1.29    | 0.00011 | -1.49    | 0.00001 | -1.64    | 0.00000 | -1.41    | 0.00041 | -1.57    | 0.00000 |

Supplementary table 1 (a)\_h\_1

| Gene Symbol | Probe Set ID   | Gene Title                                                                  | Day 1          | Day 3    |         | Day 6    |         | Day 10   |         | Day 13   |         | Day 27   |         | Day 42   |         | Day 70   |         |
|-------------|----------------|-----------------------------------------------------------------------------|----------------|----------|---------|----------|---------|----------|---------|----------|---------|----------|---------|----------|---------|----------|---------|
|             |                |                                                                             | mean<br>signal | Fold Chg | p-value |
| SMCHD1      | 212569_at      | structural maintenance of chromosomes flexible hinge domain containing 1    | 1402           | 1.66     | 0.00000 | 1.49     | 0.00003 | 1.63     | 0.00002 | 1.3      | 0.01137 | 1.4      | 0.00018 | 1.33     | 0.00097 | 1.42     | 0.00099 |
| SMCHD1      | 212579_at      | structural maintenance of chromosomes flexible hinge domain containing 1    | 1697           | 1.53     | 0.00000 | 1.37     | 0.00001 | 1.54     | 0.00002 | 1.33     | 0.00032 | 1.31     | 0.00000 | 1.26     | 0.00126 | 1.41     | 0.00013 |
| SMCHD1      | 212577_at      | structural maintenance of chromosomes flexible hinge domain containing 1    | 3613           | 1.58     | 0.00000 | 1.48     | 0.00000 | 1.57     | 0.00000 | 1.34     | 0.00055 | 1.36     | 0.00000 | 1.22     | 0.02942 | 1.27     | 0.00553 |
| SMOX        | 210357_s_at    | spermine oxidase                                                            | 569            | 1.84*    | 0.00035 | 1.29*    | 0.02582 | 1.92*    | 0.00011 | 1.30*    | 0.18036 | 1.39*    | 0.04419 | 1.63*    | 0.01551 | 2.03*    | 0.00110 |
| SMPDL3A     | 213624_at      | sphingomyelin phosphodiesterase, acid-like 3A                               | 762            | 1.23     | 0.02865 | -1.45    | 0.00346 | -1.29    | 0.00986 | -1.47    | 0.00142 | -1.66    | 0.00001 | -1.41    | 0.00096 | -1.43    | 0.00088 |
| SNAP23      | 209131_s_at    | synaptosomal-associated protein, 23kDa                                      | 626            | 1.01     | 0.92998 | -1.16    | 0.07157 | -1.07    | 0.25177 | -1.41    | 0.01308 | -1.31    | 0.03291 | -1.63    | 0.00053 | -1.49    | 0.00350 |
| SOBP        | 218974_at      | sine oculis binding protein homolog (Drosophila)                            | 233            | 1.41     | 0.00021 | 1.35     | 0.01005 | 1.56     | 0.00001 | 1.44     | 0.00063 | 1.41     | 0.00016 | 1.41     | 0.00117 | 1.33     | 0.00545 |
| SOD2        | 215223_s_at    | superoxide dismutase 2, mitochondrial                                       | 2499           | -1.11    | 0.41139 | -1.57    | 0.01628 | -1.38    | 0.03394 | -1.7     | 0.00276 | -1.41    | 0.00707 | -1.52    | 0.00055 | -1.1     | 0.52876 |
| SOX15       | 217040_x_at    | SRY (sex determining region Y)-box 15                                       | 820            | ND       |         | ND       |         | 1.17*    | 0.05558 | ND       |         | 1.49*    | 0.00386 | 1.39*    | 0.06922 | 1.71*    | 0.00048 |
| SOX4        | 210417_at      | SRY (sex determining region Y)-box 4                                        | 721            | -1.37    | 0.00016 | -1.23    | 0.03696 | -1.46    | 0.00003 | -1.48    | 0.00016 | -1.47    | 0.00011 | -1.69    | 0.00007 | -1.38    | 0.00050 |
| SP100       | 210218_s_at    | SP100 nuclear antigen                                                       | 348            | 1.85     | 0.00000 | 1.66     | 0.00006 | 1.89     | 0.00000 | 1.64     | 0.00006 | 1.64     | 0.00001 | 1.5      | 0.00001 | 1.75     | 0.00000 |
| SP100       | 202864_s_at    | SP100 nuclear antigen                                                       | 2387           | 1.93     | 0.00000 | 1.77     | 0.00002 | 1.83     | 0.00000 | 1.44     | 0.00028 | 1.62     | 0.00003 | 1.54     | 0.00005 | 1.6      | 0.00006 |
| SP100       | 202863_at      | SP100 nuclear antigen                                                       | 2231           | 1.77     | 0.00000 | 1.52     | 0.00001 | 1.73     | 0.00000 | 1.37     | 0.00012 | 1.44     | 0.00000 | 1.45     | 0.00000 | 1.55     | 0.00000 |
| SP100       | 210985_s_at    | SP100 nuclear antigen                                                       | 175            | 1.66     | 0.00002 | 1.56     | 0.00056 | 1.82     | 0.00002 | 1.43     | 0.00881 | 1.46     | 0.00130 | 1.33     | 0.00559 | 1.37     | 0.00104 |
| SP110       | 208012_x_at    | SP110 nuclear body protein                                                  | 5268           | 1.94     | 0.00000 | 1.46     | 0.00000 | 1.85     | 0.00000 | 1.52     | 0.00001 | 1.54     | 0.00000 | 1.5      | 0.00000 | 1.59     | 0.00000 |
| SP110       | 209762_x_at    | SP110 nuclear body protein                                                  | 4433           | 1.87     | 0.00000 | 1.4      | 0.00011 | 1.81     | 0.00000 | 1.57     | 0.00000 | 1.53     | 0.00000 | 1.58     | 0.00000 | 1.56     | 0.00000 |
| SP110       | 208392_x_at    | SP110 nuclear body protein                                                  | 1737           | 1.72     | 0.00000 | 1.46     | 0.00004 | 1.77     | 0.00000 | 1.44     | 0.00000 | 1.57     | 0.00001 | 1.39     | 0.00030 | 1.5      | 0.00000 |
| SP110       | 209761_s_at    | SP110 nuclear body protein                                                  | 5876           | 1.7      | 0.00000 | 1.44     | 0.00000 | 1.63     | 0.00000 | 1.3      | 0.00042 | 1.37     | 0.00001 | 1.29     | 0.00075 | 1.41     | 0.00000 |
| SPTLC2      | 203127_s_at    | serine palmitoyltransferase, long chain base subunit 2                      | 2699           | 1.56     | 0.00000 | 1.13     | 0.04549 | 1.5      | 0.00005 | 1.21     | 0.03547 | 1.18     | 0.00356 | 1.31     | 0.00200 | 1.35     | 0.00036 |
| SPTLC2      | 216202_s_at    | serine palmitoyltransferase, long chain base subunit 2                      | 1091           | 1.92     | 0.00000 | 1.16     | 0.15527 | 1.73     | 0.00072 | 1.26     | 0.04730 | 1.07     | 0.56961 | 1.27     | 0.08534 | 1.29     | 0.05098 |
| SSPN        | 204963_at      | sarcospan (Kras oncogene-associated gene)                                   | 134            | -1.52#   | 0.00304 | -1.08#   | 0.42101 | -1.80#   | 0.00065 | -1.00#   | 0.99059 | -1.62#   | 0.00191 | -1.17#   | 0.20517 | -1.65#   | 0.00549 |
| STAP1       | 220059_at      | signal transducing adaptor family member 1                                  | 629            | 1.32     | 0.00503 | 1.4      | 0.00822 | 1.46     | 0.00786 | 1.41     | 0.01629 | 1.58     | 0.00006 | 1.32     | 0.01030 | 1.84     | 0.00013 |
| STAT1       | AFFX-HUMISGF   | 91kDa                                                                       | 1305           | 2.46     | 0.00000 | 1.54     | 0.00007 | 2.42     | 0.00000 | 1.65     | 0.00033 | 1.49     | 0.00174 | 1.37     | 0.01116 | 1.47     | 0.00171 |
| STAT1       | 209969_s_at    | signal transducer and activator of transcription 1, 91kDa                   | 2479           | 2.37     | 0.00000 | 1.45     | 0.00077 | 2.26     | 0.00000 | 1.4      | 0.00143 | 1.46     | 0.00107 | 1.52     | 0.00658 | 1.44     | 0.00194 |
| STAT1       | AFFX-HUMISGF3A | 91kDa                                                                       |                |          |         |          |         |          |         |          |         |          |         |          |         |          |         |
| STAT1       | /M97935_3_at   | signal transducer and activator of transcription 1, 91kDa                   | 4980           | 1.78     | 0.00000 | 1.35     | 0.00001 | 1.76     | 0.00000 | 1.43     | 0.00014 | 1.41     | 0.00001 | 1.41     | 0.00001 | 1.39     | 0.00000 |
| STAT1       | AFFX-HUMISGF   | 91kDa                                                                       | 569            | 2.56     | 0.00000 | 1.7      | 0.00068 | 2.71     | 0.00001 | 1.72     | 0.00261 | 1.58     | 0.01509 | 1.33     | 0.04333 | 1.39     | 0.04431 |
| STAT1       | AFFX-HUMISGF   | 91kDa                                                                       | 2027           | 2.57     | 0.00000 | 1.66     | 0.00002 | 2.48     | 0.00000 | 1.73     | 0.00030 | 1.46     | 0.00327 | 1.36     | 0.02601 | 1.38     | 0.00945 |
| STAT1       | 200887_s_at    | signal transducer and activator of transcription 1, 91kDa                   | 9193           | 1.69     | 0.00000 | 1.3      | 0.00006 | 1.7      | 0.00000 | 1.41     | 0.00014 | 1.38     | 0.00008 | 1.45     | 0.00000 | 1.36     | 0.00009 |
| STAT2       | 205170_at      | signal transducer and activator of transcription 2, 113kDa                  | 637            | 1.69     | 0.00102 | 1.22     | 0.06832 | 1.7      | 0.00015 | 1.13     | 0.14572 | 1.19     | 0.11073 | -1.04    | 0.73713 | 1.2      | 0.06244 |
| TAL1        | 216925_s_at    | T-cell acute lymphocytic leukemia 1                                         | 274            | ND       |         | ND       |         | 1.43*    | 0.04380 | 1.63*    | 0.07204 | 2.09*    | 0.00160 | 1.87*    | 0.05818 | 2.71*    | 0.00055 |
| TAP1        | 202307_s_at    | transporter 1, ATP-binding cassette, sub-family B (MDR/TAP)                 | 3093           | 2.09     | 0.00000 | 1.37     | 0.00006 | 1.93     | 0.00000 | 1.47     | 0.00159 | 1.22     | 0.08957 | 1.39     | 0.00689 | 1.29     | 0.01117 |
| TBC1D22A    | 210144_at      | TBC1 domain family, member 22A                                              | 703            | -1.3     | 0.00039 | -1.24    | 0.02330 | -1.32    | 0.00173 | -1.27    | 0.00397 | -1.48    | 0.00026 | -1.48    | 0.00005 | -1.89    | 0.00000 |
| TBC1D9      | 212956_at      | TBC1 domain family, member 9 (with GRAM domain)                             | 2064           | -1.51    | 0.00006 | -1.55    | 0.00001 | -1.69    | 0.00000 | -1.38    | 0.00056 | -1.45    | 0.00000 | -1.49    | 0.00002 | -1.76    | 0.00000 |
| TBCD        | 201759_at      | tubulin folding cofactor D                                                  | 340            | -1.31#   | 0.01483 | -1.23    | 0.05912 | 1.03     | 0.83393 | 1.19     | 0.37024 | 1.64     | 0.00046 | 1.47     | 0.01017 | 1.52     | 0.00091 |
| TBXAS1      | 208130_s_at    | thromboxane A synthase 1 (platelet, cytochrome P450, family 5, subfamily A) | 1567           | -1.08    | 0.36451 | -1.3     | 0.00532 | -1.27    | 0.00561 | -1.28    | 0.01657 | -1.57    | 0.00004 | -1.3     | 0.04686 | -1.29    | 0.02243 |
| TCN2        | 204043_at      | transcobalamin II; macrocytic anemia                                        | 552            | 2.16     | 0.00000 | 1.24     | 0.00537 | 1.68     | 0.00000 | 1.31     | 0.00875 | 1.3      | 0.00920 | 1.45     | 0.00096 | 1.42     | 0.00005 |
| TDRD7       | 213361_at      | tudor domain containing 7                                                   | 1338           | 1.64     | 0.00000 | 1.28     | 0.00000 | 1.6      | 0.00000 | 1.49     | 0.00000 | 1.39     | 0.00004 | 1.46     | 0.00000 | 1.46     | 0.00000 |
| TFDP2       | 203588_s_at    | transcription factor Dp-2 (E2F dimerization partner 2)                      | 490            | 1.14     | 0.04720 | 1.14     | 0.15297 | 1.22     | 0.03339 | 1.27     | 0.01546 | 1.51     | 0.00001 | 1.37     | 0.01297 | 1.54     | 0.00117 |
| TK2         | 204276_at      | thymidine kinase 2, mitochondrial                                           | 503            | 1.03     | 0.67289 | -1.09    | 0.39985 | -1.21    | 0.03306 | -1.05    | 0.61286 | -1.19    | 0.04185 | -1.16    | 0.04035 | -1.51    | 0.00032 |
| TKT         | 208699_x_at    | transketolase (Wernicke-Korsakoff syndrome)                                 | 9769           | -1.3     | 0.00004 | -1.53    | 0.00000 | -1.51    | 0.00000 | -1.45    | 0.00001 | -1.61    | 0.00000 | -1.54    | 0.00001 | -1.48    | 0.00000 |
| TKT         | 208700_s_at    | transketolase (Wernicke-Korsakoff syndrome)                                 | 10936          | -1.18    | 0.02885 | -1.33    | 0.00620 | -1.35    | 0.00179 | -1.43    | 0.00007 | -1.51    | 0.00043 | -1.5     | 0.00009 | -1.58    | 0.00000 |
| TLR1        | 210176_at      | tol-like receptor 1                                                         | 846            | 1.59     | 0.00032 | -1.06    | 0.52935 | 1.23     | 0.03395 | 1.02     | 0.79288 | -1.01    | 0.91169 | 1.09     | 0.38678 | -1.07    | 0.43712 |
| TLR3        | 206271_at      | tol-like receptor 3                                                         | 147            | 1.50*    | 0.00319 | 1.34*    | 0.03399 | 1.49*    | 0.00695 | 1.54*    | 0.00070 | ND       |         | ND       |         | 1.13*    | 0.31138 |
| TLR7        | 220146_at      | tol-like receptor 7                                                         | 399            | 2.24     | 0.00001 | 1.17     | 0.22160 | 1.96     | 0.00025 | 1.39     | 0.06554 | 1        | 0.99649 | 1.33     | 0.02171 | 1.01     | 0.91565 |
| TMED2       | 204426_at      | transmembrane emp24 domain trafficking protein 2                            | 667            | -1.17    | 0.08846 | -1.11    | 0.22827 | -1.11    | 0.27462 | -1.34    | 0.02184 | -1.18    | 0.13850 | -1.76    | 0.00032 | -1.34    | 0.03497 |
| TMEM140     | 218999_at      | transmembrane protein 140                                                   | 1049           | 2.41     | 0.00000 | 1.31     | 0.00094 | 2.22     | 0.00000 | 1.31     | 0.00420 | 1.2      | 0.05455 | 1.35     | 0.00928 | 1.54     | 0.00073 |
| TMOD3       | 220800_s_at    | tropomodulin 3 (ubiquitous)                                                 | 169            | 1.63     | 0.00055 | 1.39     | 0.04117 | 1.48     | 0.00071 | 1.39     | 0.02636 | 1.31     | 0.09044 | 1.01     | 0.90932 | 1.16     | 0.37191 |
| TNFAIP6     | 206025_s_at    | tumor necrosis factor, alpha-induced protein 6                              | 233            | 1.87**   | 0.00322 | ND       |         | 1.51*    | 0.00051 | ND       |         | ND       |         | ND       |         | ND       |         |
| TNFAIP6     | 206026_s_at    | tumor necrosis factor, alpha-induced protein 6                              | 231            | 2.07     | 0.00099 | -1       | 0.99210 | 1.59     | 0.00253 | 1.2      | 0.29455 | 1.1      | 0.54454 | 1.09     | 0.56358 | 1.08     | 0.63088 |

Supplementary table 1 (a )\_h\_j1

| Gene Symbol   | Probe Set ID | Gene Title                                                                                  | Day 1          | Day 3    |         | Day 6    |         | Day 10   |         | Day 13   |         | Day 27   |         | Day 42   |         | Day 70   |         |
|---------------|--------------|---------------------------------------------------------------------------------------------|----------------|----------|---------|----------|---------|----------|---------|----------|---------|----------|---------|----------|---------|----------|---------|
|               |              |                                                                                             | mean<br>signal | Fold Chg | p-value |
| TNFRSF25      | 211841_s_at  | tumor necrosis factor receptor superfamily, member 25                                       | 683            | 1.15     | 0.07056 | 1.51     | 0.00002 | 1.35     | 0.00044 | 1.59     | 0.00034 | 1.44     | 0.00003 | 1.55     | 0.01370 | 1.46     | 0.00076 |
| TNFRSF8       | 206729_at    | tumor necrosis factor receptor superfamily, member 8                                        | 658            | 1        | 0.96923 | -1.49    | 0.00039 | -1.34    | 0.00732 | -1.64    | 0.00003 | -1.61    | 0.00000 | -1.6     | 0.00005 | -1.7     | 0.00000 |
| TNFSF10       | 202687_s_at  | tumor necrosis factor (ligand) superfamily, member 10                                       | 2896           | 2.34     | 0.00000 | 1.16     | 0.06597 | 1.95     | 0.00000 | 1.4      | 0.00149 | 1.1      | 0.27355 | 1.11     | 0.40561 | 1.11     | 0.43599 |
| TNFSF10       | 202688_at    | tumor necrosis factor (ligand) superfamily, member 10                                       | 7233           | 2.04     | 0.00000 | 1.06     | 0.46959 | 1.59     | 0.00002 | 1.17     | 0.03032 | -1.01    | 0.87814 | 1.09     | 0.39137 | 1.08     | 0.48364 |
| TNFSF10       | 214329_x_at  | tumor necrosis factor (ligand) superfamily, member 10                                       | 1467           | 2.01     | 0.00000 | -1       | 0.99181 | 1.72     | 0.00182 | 1.29     | 0.07697 | -1.16    | 0.22638 | 1.16     | 0.30896 | -1.19    | 0.25887 |
| TNS1          | 221748_s_at  | tensin 1                                                                                    | 562            | 1.4      | 0.00545 | 1.08     | 0.53973 | 1.7      | 0.00001 | 2.37     | 0.07299 | 2.29     | 0.00167 | 2.6      | 0.02500 | 3.26     | 0.00243 |
| TOB2          | 222243_s_at  | transducer of ERBB2, 2                                                                      | 702            | -1.1     | 0.20294 | -1.05    | 0.55289 | -1.15    | 0.05550 | -1.02    | 0.81786 | -1.39    | 0.00027 | -1.2     | 0.01561 | -1.71    | 0.00000 |
| TOR1B         | 209593_s_at  | torsin family 1, member B (torsin B)                                                        | 1585           | 1.89     | 0.00000 | 1.29     | 0.00026 | 1.65     | 0.00000 | 1.53     | 0.00000 | 1.3      | 0.00191 | 1.39     | 0.00448 | 1.35     | 0.00043 |
| TRAFD1        | 202837_at    | TRAF-type zinc finger domain containing 1                                                   | 387            | 1.99*    | 0.00001 | ND       |         | 1.37*    | 0.04119 | ND       |         | ND       |         | ND       |         | ND       |         |
| TRAK2         | 202125_s_at  | trafficking protein, kinesin binding 2                                                      | 1770           | 1.04     | 0.24888 | 1.08     | 0.07092 | 1.16     | 0.00112 | 1.41     | 0.00617 | 1.5      | 0.00010 | 1.62     | 0.00022 | 1.67     | 0.00064 |
| TREX1         | 205875_s_at  | three prime repair exonuclease 1                                                            | 1871           | 1.97*    | 0.00000 | 1.13*    | 0.08996 | 1.79*    | 0.00000 | 1.32*    | 0.00683 | ND       |         | 1.36*    | 0.00350 | 1.35*    | 0.00137 |
| TRIM14        | 203148_s_at  | tripartite motif-containing 14                                                              | 2531           | 1.51     | 0.00001 | 1.29     | 0.00952 | 1.4      | 0.00053 | 1.33     | 0.00121 | 1.13     | 0.14676 | 1.22     | 0.01181 | 1.06     | 0.34513 |
| TRIM21        | 204804_at    | tripartite motif-containing 21                                                              | 1531           | 1.64     | 0.00002 | 1.2      | 0.05582 | 1.69     | 0.00012 | 1.4      | 0.00472 | 1.19     | 0.06869 | 1.27     | 0.03776 | 1.23     | 0.04461 |
| TRIM22        | 213293_s_at  | tripartite motif-containing 22                                                              | 10465          | 1.72     | 0.00000 | 1.45     | 0.00000 | 1.65     | 0.00000 | 1.47     | 0.00000 | 1.46     | 0.00000 | 1.41     | 0.00000 | 1.5      | 0.00000 |
| TRIM38        | 203567_s_at  | tripartite motif-containing 38                                                              | 3072           | 1.63     | 0.00000 | 1.32     | 0.00002 | 1.5      | 0.00000 | 1.34     | 0.00001 | 1.29     | 0.00004 | 1.21     | 0.00418 | 1.23     | 0.00274 |
| TRIM38        | 203610_s_at  | tripartite motif-containing 38                                                              | 1396           | 1.82     | 0.00000 | 1.35     | 0.00003 | 1.55     | 0.00000 | 1.34     | 0.00016 | 1.19     | 0.00987 | 1.1      | 0.17158 | 1.13     | 0.06292 |
| TRIM5         | 210705_s_at  | tripartite motif-containing 5                                                               | 459            | 1.81     | 0.00003 | 1.22     | 0.08498 | 1.55     | 0.00183 | 1.46     | 0.00592 | 1.34     | 0.00791 | 1.34     | 0.01796 | 1.24     | 0.08066 |
| TRIM58        | 215047_at    | tripartite motif-containing 58                                                              | 726            | 1.73     | 0.05524 | -1.12    | 0.72417 | 2.53     | 0.00073 | 2.6      | 0.04365 | 4        | 0.00094 | 3.28     | 0.00928 | 4.16     | 0.00018 |
| TRIM6-TRIM34  | 221044_s_at  | tripartite motif-containing 34                                                              | 1196           | 1.69     | 0.00000 | 1.29     | 0.00342 | 1.51     | 0.00006 | 1.35     | 0.00013 | 1.23     | 0.00110 | 1.23     | 0.02391 | 1.17     | 0.06064 |
| TRIP6         | 209129_at    | thyroid hormone receptor interactor 6                                                       | 245            | 1.57     | 0.00001 | 1.37     | 0.00086 | 1.41     | 0.00034 | 1.28     | 0.00661 | 1.35     | 0.00225 | 1.42     | 0.00115 | 1.28     | 0.00085 |
| TSC22D1       | 215111_s_at  | TSC22 domain family, member 1                                                               | 2072           | 1.33     | 0.00448 | 1.24     | 0.01004 | 1.57     | 0.00029 | 1.07     | 0.37527 | 1.21     | 0.00656 | 1.23     | 0.00487 | 1.69     | 0.00016 |
| TSC22D3       | 207001_x_at  | TSC22 domain family, member 3                                                               | 2220           | -1.53    | 0.00869 | 1.09     | 0.66441 | -1.13    | 0.51701 | -2.03    | 0.00053 | -1.65    | 0.00519 | -1.83    | 0.00665 | -1.57    | 0.01786 |
| TUBA1A        | 209118_s_at  | tubulin, alpha 1a                                                                           | 7743           | -1.2     | 0.00212 | -1.36    | 0.00081 | -1.4     | 0.00015 | -1.7     | 0.00022 | -1.42    | 0.00022 | -1.43    | 0.00002 | -1.4     | 0.00002 |
| TUBB1         | 208601_s_at  | tubulin, beta 1                                                                             | 1467           | 1.57     | 0.02238 | -1.18    | 0.30296 | 1.05     | 0.71619 | -1.38    | 0.04566 | -1.68#   | 0.00089 | -1.27    | 0.22907 | -1.01    | 0.94267 |
| TXNDC5        | 221253_s_at  | thioredoxin domain containing 5                                                             | 3419           | -1.43    | 0.00657 | -1.22    | 0.14290 | -1.78    | 0.00053 | -1.41    | 0.04817 | -1.48    | 0.02379 | -1.4     | 0.16100 | -1.85    | 0.00559 |
| TYMS          | 202589_at    | thymidylate synthetase                                                                      | 744            | 1.25     | 0.03261 | 1.22     | 0.10831 | 1.37     | 0.01644 | 1.19     | 0.12184 | 1.3      | 0.01334 | 1.48     | 0.00068 | 1.5      | 0.00039 |
| UBAP2L        | 201377_at    | ubiquitin associated protein 2-like                                                         | 1133           | 1.07     | 0.22277 | 1.26     | 0.00480 | 1.23     | 0.00520 | 1.19     | 0.05869 | 1.36     | 0.01194 | 1.24     | 0.01020 | 1.51     | 0.00008 |
| UBE2L6        | 201649_at    | ubiquitin-conjugating enzyme E2L 6                                                          | 6323           | 1.91     | 0.00000 | 1.32     | 0.00001 | 1.81     | 0.00000 | 1.31     | 0.00093 | 1.25     | 0.00218 | 1.26     | 0.00085 | 1.27     | 0.00008 |
| UBL3          | 201534_s_at  | ubiquitin-like 3                                                                            | 2189           | -1.29    | 0.00801 | -1.16    | 0.26636 | -1.33    | 0.01555 | -1.35    | 0.01097 | -1.66    | 0.00062 | -1.61    | 0.00162 | -1.85    | 0.00002 |
| UNC119B       | 202365_at    | unc-119 homolog B (C. elegans)                                                              | 995            | -1.58    | 0.00000 | -1.28    | 0.00204 | -1.61    | 0.00000 | -1.24    | 0.00233 | -1.22    | 0.00282 | -1.25    | 0.00078 | -1.33    | 0.00013 |
| UQCRCB        | 209066_x_at  | ubiquinol-cytochrome c reductase binding protein                                            | 10284          | -1.27    | 0.01217 | -1.07    | 0.52318 | -1.36    | 0.00081 | -1.41    | 0.01819 | -1.54    | 0.00069 | -1.53    | 0.00013 | -1.58    | 0.00003 |
| USP18 ///     |              |                                                                                             |                |          |         |          |         |          |         |          |         |          |         |          |         |          |         |
| LOC727996 /// |              |                                                                                             |                |          |         |          |         |          |         |          |         |          |         |          |         |          |         |
| LOC728216 /// |              |                                                                                             |                |          |         |          |         |          |         |          |         |          |         |          |         |          |         |
| LOC728438     | 219211_at    | ubiquitin specific peptidase 18 /// similar to ubiquitin specific peptidase 18              | 287            | 7.43*    | 0.00000 | 4.93*    | 0.00000 | 7.47*    | 0.00000 | 5.07*    | 0.00000 | 4.50*    | 0.00000 | 5.28*    | 0.00000 | 5.50*    | 0.00000 |
| UTRN          | 213023_at    | utrophin                                                                                    | 691            | 1.51     | 0.00008 | 1.24     | 0.00304 | 1.32     | 0.00111 | 1.17     | 0.04872 | 1.16     | 0.13223 | -1.04    | 0.65005 | -1.03    | 0.73095 |
| VDR           | 204255_s_at  | vitamin D (1,25-dihydroxyvitamin D3) receptor                                               | 539            | 1.6      | 0.00001 | 1.02     | 0.80767 | 1.17     | 0.04634 | 1.08     | 0.33407 | 1.03     | 0.66745 | 1.16     | 0.25408 | 1.22     | 0.06791 |
| VPREB3        | 220068_at    | pre-B lymphocyte gene 3                                                                     | 600            | ND       |         | 1.44     | 0.01914 | ND       |         | 1.46     | 0.00615 | 1.5      | 0.00093 | 1.48     | 0.05441 | 1.28     | 0.05493 |
| WARS          | 200629_at    | tryptophanyl-tRNA synthetase                                                                | 6088           | 1.09     | 0.26161 | -1.44    | 0.00177 | -1.16    | 0.12151 | -1.61    | 0.00040 | -1.52    | 0.00059 | -1.45    | 0.00407 | -1.4     | 0.01123 |
| WBP5          | 217975_at    | WW domain binding protein 5                                                                 | 158            | 1.31     | 0.00146 | 1.47     | 0.00005 | 1.63     | 0.00021 | 1.43     | 0.00250 | 1.65     | 0.00006 | 1.77     | 0.00002 | 1.91     | 0.00000 |
| WDR1          | 210935_s_at  | WD repeat domain 1                                                                          | 992            | -1.12    | 0.11360 | -1.26    | 0.03185 | -1.2     | 0.07726 | -1.12    | 0.22391 | -1.35    | 0.00407 | -1.51    | 0.00066 | -1.57    | 0.00098 |
| WRB           | 202749_at    | tryptophan rich basic protein                                                               | 1069           | -1       | 0.99843 | -1.04    | 0.63399 | -1.11    | 0.26350 | -1.09    | 0.54838 | -1.52    | 0.00012 | -1.26    | 0.05054 | -1.67    | 0.00012 |
| WSB1          | 210561_s_at  | WD repeat and SOCS box-containing 1                                                         | 3340           | 1.52     | 0.00000 | 1.19     | 0.03237 | 1.37     | 0.00063 | 1.2      | 0.07249 | 1.12     | 0.10727 | -1.03    | 0.74941 | 1.15     | 0.11347 |
| XAF1          | 206133_at    | XIAP associated factor-1                                                                    | 1551           | 4.25     | 0.00000 | 3.29     | 0.00000 | 3.76     | 0.00000 | 2.93     | 0.00000 | 2.93     | 0.00001 | 2.47     | 0.00000 | 3.08     | 0.00000 |
| XK            | 206698_at    | X-linked Kx blood group (McLeod syndrome)                                                   | 293            | 1.61     | 0.00353 | 1.17     | 0.15331 | 2.06     | 0.00002 | 2.6      | 0.03571 | 3.84     | 0.00433 | 4.42     | 0.01340 | 5.68     | 0.00211 |
| ZBP1          | 208087_s_at  | Z-DNA binding protein 1                                                                     | 176            | 3.03*    | 0.00000 | 2.19*    | 0.00001 | 3.03*    | 0.00000 | 2.22*    | 0.00001 | 2.05*    | 0.00003 | 2.16*    | 0.00029 | 2.21*    | 0.00001 |
| ZCCHC2        | 219062_s_at  | zinc finger, CCHC domain containing 2                                                       | 1318           | 2.26     | 0.00000 | 1.89     | 0.00001 | 2.24     | 0.00000 | 1.68     | 0.00032 | 1.79     | 0.00000 | 1.84     | 0.00000 | 1.76     | 0.00000 |
| ZEB2          | 203603_s_at  | zinc finger E-box binding homeobox 2                                                        | 924            | 1.12     | 0.20456 | -1.26    | 0.00240 | -1.23    | 0.05835 | -1.39    | 0.00849 | -1.47    | 0.00138 | -1.41    | 0.00221 | -1.53    | 0.00034 |
| ZFX           | 214678_x_at  | zinc finger protein, X-linked                                                               | 215            | -1.15    | 0.16097 | -1.1     | 0.41807 | -1.22    | 0.06382 | -1.45    | 0.00488 | -1.32    | 0.01256 | -1.37    | 0.00833 | -1.54    | 0.00034 |
| ZNF652        | 205594_at    | zinc finger protein 652                                                                     | 805            | -1.48    | 0.00141 | -1.26    | 0.04962 | -1.7     | 0.00008 | -1.28    | 0.05005 | -1.28    | 0.05052 | -1.5     | 0.00015 | -1.48    | 0.00255 |
| ---           | 212605_s_at  | AF034176 Human mRNA (Tripodis and Ragoussis)                                                | 1616           | -1.6     | 0.00000 | -1.16    | 0.01702 | -1.48    | 0.00000 | -1.36    | 0.00010 | -1.34    | 0.00002 | -1.29    | 0.00020 | -1.35    | 0.00000 |
| ---           | 221973_at    | Homo sapiens cDNA clone ntcon5 contig                                                       | 701            | 1.05     | 0.60288 | 1.39     | 0.00090 | 1.28     | 0.02683 | 1.16     | 0.04008 | 1.31     | 0.00514 | 1.5      | 0.00032 | 1.43     | 0.01323 |
| ---           | 215617_at    | CDNA FLJ11754 fis. clone HEMBA1005588                                                       | 90             | 3.12*    | 0.00000 | 2.38*    | 0.00003 | 3.12*    | 0.00000 | 2.32*    | 0.00001 | 2.57*    | 0.00000 | 2.55*    | 0.00000 | 2.61*    | 0.00000 |
| ---           | 213817_at    | CDNA FLJ13601 fis. clone PLACE1010069                                                       | 591            | -1.14    | 0.14782 | -1.23    | 0.05893 | -1.24    | 0.09077 | -1.28    | 0.03051 | -1.55    | 0.00001 | -1.18    | 0.14125 | -1.42    | 0.00004 |
| ---           | 213294_at    | Full-length cDNA clone CS0DK002YF13 of HeLa cells Cot 25-normalized of Homo sapiens (human) | 2142           | 3.34     | 0.00000 | 2.64     | 0.00000 | 3.39     | 0.00000 | 2.55     | 0.00000 | 2.5      | 0.00000 | 2.67     | 0.00000 | 2.8      | 0.00000 |
| ---           | 213710_s_at  | Transcribed locus                                                                           | 1343           | -1.31    | 0.00082 | -1.21    | 0.03008 | -1.19    | 0.02478 | -1.11    | 0.34402 | -1.13    | 0.16092 | -1.22    | 0.02284 | -1.54    | 0.00029 |
| ---           | 202015_x_at  | ---                                                                                         | 46             | 1.38*    | 0.18350 | 1.31*    | 0.13573 | 1.58*    | 0.00093 | 1.18*    | 0.39859 | ND       |         | ND       |         | ND       |         |

Supplementary table 1 (a )\_h\_j1

| Gene Symbol | Probe Set ID | Gene Title | Day 1       | Day 3    |         | Day 6    |         | Day 10   |         | Day 13   |         | Day 27   |         | Day 42   |         | Day 70   |         |
|-------------|--------------|------------|-------------|----------|---------|----------|---------|----------|---------|----------|---------|----------|---------|----------|---------|----------|---------|
|             |              |            | mean signal | Fold Chg | p-value |
| ---         | 211781_x_at  | ---        | 295         | 1.18*    | 0.20604 | 1.33*    | 0.09583 | 2.57*    | 0.00094 | 4.81*    | 0.00781 | 7.37*    | 0.00100 | 7.68*    | 0.01292 | 11.19*   | 0.00083 |
| ---         | 217019_at    | ---        | 196         | -1.63    | 0.00107 | -1.32    | 0.02501 | -1.61#   | 0.00083 | -1.33    | 0.08376 | -1.59#   | 0.00288 | -1.48    | 0.02907 | -1.98#   | 0.00003 |
| ---         | 211600_at    | ---        | 15352       | -1.37    | 0.00534 | -1.32    | 0.02561 | -1.53    | 0.00078 | -1.63    | 0.00107 | -1.52    | 0.00161 | -1.77    | 0.00008 | -1.48    | 0.00174 |
| ---         | 210596_at    | ---        | 671         | -1.15    | 0.06996 | -1.27    | 0.01484 | -1.18    | 0.07926 | -1.38    | 0.02024 | -1.08    | 0.40754 | -1.29    | 0.01053 | -1.55    | 0.00056 |
| ---         | 220494_s_at  | ---        | 1723        | -1.08    | 0.37671 | -1.09    | 0.38333 | -1.13    | 0.17846 | -1.23    | 0.04707 | -1.32    | 0.01359 | -1.31    | 0.00385 | -1.72    | 0.00026 |

\* Gene turned on: not detected on day 1, but expressed at this time point; fold change may be inaccurate.

# Gene turned off: detected on day 1 but not detected at this time point; fold change may be inaccurate.

ND: gene not detected either at day 1 or this time point.
